# Supplementary material for: Leaps and bounds: geographical and ecological distance constrained the colonisation of the Afrotemperate by Erica
Source: bioRxiv preprint, doi:10.1101/290791, version 5 (2018-12-21)
Supplement: Appendix 5 [file 290791_file06.nex]

#NEXUS
[written Thu Sep 28 14:12:47 CEST 2017 by Mesquite  version 3.31 (build 859) at PC13-SPEZBOT-01/134.93.156.253]

BEGIN TAXA;
	TITLE Taxa;
	DIMENSIONS NTAX=483;
	TAXLABELS
		abietina_abi_MP1013 accommodata_EO11382 acuta_MP506 adnata_MP501 adunca_EO12746 agglutinans_EO7679 albens_ANA albertyniae_MP927 albescens_MP898 alexandri_EO12449 alfredii_FR algida_MP645 alopecurus_MP630 amidae_EO12272 amoena_MP1032 ampullacea_MP1277 aneimena_EO12757 anguliger_MP597 angulosa_S2105 annectens_ANA arachnocalyx_EO12453 arborea_EO12619 arborescens_FM747 arcuata_MP523 ardens_MP1076 areolata_EO12502 argentea_EO12475 artemisioides_MP551 aspalathifolia_DB1408 astroites_EO12758 atherstonei_EO12261 atromontana_EO12544 atrovinosa_MP864 australis_b_ANA autumnalis_MP665 axillaris_MP1052 axilliflora_MP916 baccans_BG645 banksii_com_ANA barbigeroides_MP735 baroniana_cf_Lar8 baueri_bau_MP1233 benguelensis_A1 benthamiana_MP560 bergiana_MP768 bicolor_MP1098 blandfordii_MM4208 blenna_ANA bodkinii_TdV204 bojeri_MP1087 bokkeveldia_EO12769 bolusanthus_DEB1720 bolusiae_ANA boutonii_EO12666 brachialis_MP734 brachysepala_EO12727 bracteolaris_MP577 brevifolia_EO12459 bruniades_EO12465 bruniifolia_EO12460 caespitosa_MP642 caffra_ANA caffrorum_MP644 calcareophila_EO30159 caledonica_JW103 Calluna_vulgaris_ANA calycina_EO12532 cameronii_ANA canaliculata_BG590 canescens_ANA capensis_MP1047 capillaris_MP1066 capitata_ANA caprina_EO12772 carnea_ATsn5 caterviflora_EO12785 cereris_MP863 cerinthoides_ANA cernua_EO12474 cetrata_EO12064 chamissonis_RT2188 chartacea_EO11408 chionodes_EO11699 chionophila_MP790 chiroptera_MP814 chrysocodon_ANA ciliaris_c_ANA cinerea_a_ANA clavisepala_ANA coacervata_MP761 coarctata_ANA coarctata_MP590 coccinea_coc_MP598 collina_EO12613 colorans_EO12717 condensata_MP890 conspicua_CS1 cooperi_EO12588 copiosa_BG610 cordata_MP571 corifolia_ANA corydalis_MP1005 cristata_MP820 cruenta_MP745 cryptoclada_EO12684 cubica_MP623 cumuliflora_EO12699 curtophylla_EO12750 curviflora_MP765 curvifolia_MP700 curvirostris_MP817 cyathiformis_a_ANA cylindrica_MP1240 cyrilliflora_CM10 Daboecia_cantabrica_ANA daphniflora_MP567 deflexa_MP1247 demissa_EO12540 densifolia_BG591 denticulata_MP799 depressa_MP942 desmantha_MP562 dianthifolia_MP583 diaphana_BG611 discolor_heb_MP1214 dispar_EO12749 dissimulans_EO12596 distorta_EO12500 dodii_EO11417 dolfiana_MP1297 doliiformis_MP797 dominans_MP648 drakensbergensis_DB1443 dregei_EO12711 duthieae_ANA eburnea_MP1037 ecklonii_EO12739 elimensis_EO12843 empetrina_EO12786 equisetifolia_MP829 erasmia_MP874 eremioides_MP533 ericoides_MP742 erigena_a_ANA erinus_MP907 eriophoros_EO12478 esterhuyseniae_EO11831 esteriana_EO12545 eustacei_MP1259 evansii_MP641 excavata_GK1532 exleeana_EO12499 fascicularis_fac_MP809 fastigiata_MP830 fausta_MP663 ferrea_EO12494 filago_BG93 filamentosa_EO12728 fillipendula_fil_MP914 fimbriata_MP606 flacca_MP840 floccifera_MP987 florifera_EO12536 fontana_MP1069 frigida_MP658 galioides_FN745 garciae_MP1253 georgica_ANA gerhardii_EO12700 gibbosa_ANA glabella_la_EO11224 glandulipila_MP521 glandulosa_fou_ANA glaphyra_MP647 glauca_gla_MP850 globiceps_con_EO12519 glomiflora_EO12548 glutinosa_MP687 gnaphaloides_MP511 goatcheriana_dra_EO12694 goudotiana_EO12636 gracilipes_MM5014 gracilis_BG622 grata_MP879 greyi_EO12501 gysbertii_MP826 haemastoma_MP871 haematocodon_MP1033 halicacaba_ANA hanekomii_EO11172 hansfordii_MP1239 hebeclada_EO12686 heleogena_MP1064 heleophila_ANA hendricksei_EO12524 hermani_EO12498 hexandra_RC465 hibbertii_MP982 hillburtii_EO12593 hirtiflora_MP958 hispidula_MP801 hispiduloides_EO11544 holosericea_EO12842 holtii_TO hottentotica_EO humbertii_EO12638 humidicola_EO11353 humifusa_MP846 imbricata_MP688 inaequalis_MP539 incarnata_EO12771 inflata_MP784 infundibuliformis_MP1238 ingeana_EO12759 innovans_MP918 inordinata_EO11823 intermedia_MM5082 interrupta_MP911 ioniana_EO12781 isaloensis_DB1253 jasminiflora_EO12612 johnstoniana_RC464 jonasiana_MP985 juniperina_SV952 junonia_min_MP866 karooica_MP1285 karwyderi_EO12718 kingaensis_rug_BB2981 krugeri_EO12807 labialis_MP696 lachnaeifolia_MP994 laeta_MP1045 lambertii_ANA lanata_MP1220 lanceolifera_RC463 lasciva_MP906 lateralis_MP721 lateriflora_EO12482 lavandulifolia_EO12506 lehmannii_MP625 leonis_RTsn lepidota_MP541 leptopus_ANA leucanthera_EO12452 leucodesmia_MP724 leucopelta_EO12598 leucosiphon_MP776 leucotrachela_ANA lignosa_EO11763 lithophila_MP1301 loganii_MP1258 longimontana_MP587 lucida_MP690 mackayana_b_ANA macowanii_mac_MP810 macrotrema_MM4625 madagascariensis_MP1086 maderensis_AH maderi_MP757 madida_MP573 magistrati_EO11750 magnisylvae_EO10708 malmesburiensis_EO12575 mammosaP_MP951 manipuliflora_a_ANA margaritacea_ANA marifolia_CM4 massonii_MP811 mauritiensis_CB2632 maximilianii_EO12484 melanthera_MP610 melastoma_mel_MP773 microdonta_A5 mira_MP1257 modesta_ANA monadelphia_FO monsoniana_MP986 montis_hominis_EO11827 multiflexuosa_EO12445 multiflora_a_ANA multumbellifera_MP822 muscosa_MP775 myriadenia_EO12679 nabea_ANA nana_ANA natalitia_EO12514 nematophylla_EO12747 nemerosa_MP1208 nervata_EO12541 nevillei_MP1056 nubigena_MP868 nudiflora_MP802 nutans_BG599 oatesii_ANA oblongiflora_ANA obtusata_EO12458 occulta_EO ocellata_MP574 odorata_MP561 oligantha_TdV86 oliveri_MP1278 oreotragus_ANA oresigena_MP759 orientalis_EO12608 ovina_EO12487 oxycoccifolia_MP1275 oxysepala_MP780 pageana_ANA palliiflora_EO12533 paniculata_MP1274 pannosa_EO12490 parilis_MP751 parkeri_EO12682 parviflora_EO12492 parviporandra_MP877 passerinae_MP1302 patens_EO12457 patersonii_a_ANA paucifolia_cil_EO12528 pectinifolia_BG601 peltata_MP1231 penduliflora_MP923 penicilliformis_MP889 perlata_MP960 perplexa_EO12788 perrieri_EO12635 perspicua_per_MP821 petiolaris_EO12783 petricola_MP996 petrophila_EO7592 phacelanthera_EO12489 phaeocarpa_SM2003 phillipsii_MP794 physantha_MP1242 physodes_ANA physophylla_EO11418 pillansii_pil_MP813 pinea_MP789 piquetbergensis_MM5532 placentiflora_EO12477 planifolia_MP1012 platycalyx_MP1243 pleiotricha_RC461 plukenetii_plu_EO plumigera_EO11341 plumosa_EO12480 podophylla_MP582 pogonanthera_EO12835 polycoma_FR praecox_MP795 prolata_EO12748 propendens_EO12464 psittacina_IJ1237 pubescens_EO12503 pubigera_MP572 pulchella_MP736 pulvinata_MP1304 pycnantha_MP1011 pyxidiflora_ANA quadrangularis_MP620 quadrisulcata_MP1031 radicans_sch_MP1018 rakotozafyana_EO12661 recta_ANA recurvifolia_EO12475a reenensis_MP661 regerminans_MP576 regia_reg_MP922 remota_EO10386 retorta_ANA reunionensis_FN744 revoluta_BT13679 rhodopis_BAB13 rigidula_MP534 riparia_MP908 rivularis_BB13936 rosacea_gla_BG628 rubens_EO12479 rubiginosa_RT1554 rugata_EO12516 russakiana_MP684 rusticula_EO12471 salteri_S2065 savileae_MP975 saxicola_EO12515 scoparia_AH scytophylla_MP1021 selaginifolia_EO12488 senilis_EO12483 serrata_MP818 sessiliflora_MP604 setacea_MP589 shannonii_TdV262 sicula_sic_AM silvatica_A2 simii_RC466 similis_MP804 simulans_ANA sitiens_MP827 sociorum_cf_MP1055 solandri_EO12753 sonderiana_MP756 sparrmanii_ANA sparsa_BG602 spectabilis_MP929 sphaerocephala_MP848 spiculifolia_AS57234 sp_mad3_EO12632 sp_mad5_EO12641 sp_mitrastylus2_EO12691 sp_muscosa_EO12639 sp_nov_MP1291 sp_pachysa_EO12720 spumosa_MP978 squarrosa_EO11742 stagnalis_sta_MP668 steinbergiana_EO12763 stokoeanthus_EO4790 stokoei_MP825 straussiana_MP638 strigilifolia_MP619 strigosa_MP673 stylaris_ANA subcapitata_MP1042 subdivaricata_MP671 subulata_MdV2 subverticillaris_EO12625 swaziensis_L1187 tegulifolia_MP557 tenuis_EO12491 terminalis_a_ANA tetralix_c_ANA tetrathecoides_MP1252 thamnoides_MP1211 thimifolia_CM7 thodei_MP656 thomae_MP807 thomensis_EO12615 thunbergii_AH2612 tomentosa_MP961 toringbergensis_ANA totta_MP525 tradouwensis_MP903 transparens_MP893 trichophora_EO12701 trichophylla_EO10906 trichroma_EO12517 triflora_MP564 trimera_MsnA tristis_MP932 tumida_MP755 turgida_S1962 tysonii_EO12583 uberiflora_BG586 umbellata_DS umbelliflora_RT2182 umbratica_EO12760 unicolor_uni_MP1249 unilateralis_MP1205 urceolata_MP955 urna_viridis_MP946 ustulescens_RT1553 uysii_ANA vagans_MP972 vallis_aranearum_ANA vallis_fluminis_EO12761 velatiflora_EO12547 ventricosa_MP713 verecunda_CS5 vernicosa_MP928 versicolor_ver_MP1232 verticillata_ANA vestita_EO12702 villosa_EO11394 viridiflora_MP1246 viscaria_vis_MdV4 walkeri_MP1237 wendlandiana_EO12731 whyteana_A4 woodii_DB1444 zebrensis_EO12787 zeyheriana_EO zwartbergensis_MP608 
	;

END;


BEGIN CHARACTERS;
	TITLE  Character_Matrix;
	DIMENSIONS  NCHAR=1;
	FORMAT DATATYPE = STANDARD GAP = - MISSING = ? SYMBOLS = "  0 1 2 3 4";
	CHARSTATELABELS 
		1 Distribution /  Cape Europe Madagascar Drakensberg Tropical_Africa ; 
	MATRIX
	abietina_abi_MP1013       0
	accommodata_EO11382       0
	acuta_MP506               0
	adnata_MP501              0
	adunca_EO12746            0
	agglutinans_EO7679        0
	albens_ANA                0
	albertyniae_MP927         0
	albescens_MP898           0
	alexandri_EO12449         0
	alfredii_FR               0
	algida_MP645              3
	alopecurus_MP630          3
	amidae_EO12272            0
	amoena_MP1032             0
	ampullacea_MP1277         0
	aneimena_EO12757          0
	anguliger_MP597           0
	angulosa_S2105            0
	annectens_ANA             0
	arachnocalyx_EO12453      0
	arborea_EO12619           1
	arborescens_FM747         2
	arcuata_MP523             0
	ardens_MP1076             0
	areolata_EO12502          0
	argentea_EO12475          0
	artemisioides_MP551       0
	aspalathifolia_DB1408     3
	astroites_EO12758         0
	atherstonei_EO12261       3
	atromontana_EO12544       0
	atrovinosa_MP864          0
	australis_b_ANA           1
	autumnalis_MP665          0
	axillaris_MP1052          0
	axilliflora_MP916         0
	baccans_BG645             0
	banksii_com_ANA           0
	barbigeroides_MP735       0
	baroniana_cf_Lar8         2
	baueri_bau_MP1233         0
	benguelensis_A1           4
	benthamiana_MP560         0
	bergiana_MP768            0
	bicolor_MP1098            0
	blandfordii_MM4208        0
	blenna_ANA                0
	bodkinii_TdV204           0
	bojeri_MP1087             2
	bokkeveldia_EO12769       0
	bolusanthus_DEB1720       0
	bolusiae_ANA              0
	boutonii_EO12666          2
	brachialis_MP734          0
	brachysepala_EO12727      0
	bracteolaris_MP577        0
	brevifolia_EO12459        0
	bruniades_EO12465         0
	bruniifolia_EO12460       0
	caespitosa_MP642          0
	caffra_ANA                (0 3)
	caffrorum_MP644           3
	calcareophila_EO30159     0
	caledonica_JW103          0
	Calluna_vulgaris_ANA      1
	calycina_EO12532          0
	cameronii_ANA             0
	canaliculata_BG590        0
	canescens_ANA             0
	capensis_MP1047           0
	capillaris_MP1066         0
	capitata_ANA              0
	caprina_EO12772           0
	carnea_ATsn5              1
	caterviflora_EO12785      0
	cereris_MP863             0
	cerinthoides_ANA          (0 3)
	cernua_EO12474            0
	cetrata_EO12064           0
	chamissonis_RT2188        0
	chartacea_EO11408         0
	chionodes_EO11699         0
	chionophila_MP790         0
	chiroptera_MP814          0
	chrysocodon_ANA           0
	ciliaris_c_ANA            1
	cinerea_a_ANA             1
	clavisepala_ANA           0
	coacervata_MP761          0
	coarctata_ANA             0
	coarctata_MP590           0
	coccinea_coc_MP598        0
	collina_EO12613           0
	colorans_EO12717          0
	condensata_MP890          0
	conspicua_CS1             0
	cooperi_EO12588           0
	copiosa_BG610             0
	cordata_MP571             0
	corifolia_ANA             0
	corydalis_MP1005          0
	cristata_MP820            0
	cruenta_MP745             0
	cryptoclada_EO12684       2
	cubica_MP623              0
	cumuliflora_EO12699       0
	curtophylla_EO12750       0
	curviflora_MP765          0
	curvifolia_MP700          0
	curvirostris_MP817        0
	cyathiformis_a_ANA        0
	cylindrica_MP1240         0
	cyrilliflora_CM10         0
	Daboecia_cantabrica_ANA   1
	daphniflora_MP567         0
	deflexa_MP1247            0
	demissa_EO12540           0
	densifolia_BG591          0
	denticulata_MP799         0
	depressa_MP942            0
	desmantha_MP562           0
	dianthifolia_MP583        0
	diaphana_BG611            3
	discolor_heb_MP1214       0
	dispar_EO12749            0
	dissimulans_EO12596       3
	distorta_EO12500          0
	dodii_EO11417             0
	dolfiana_MP1297           0
	doliiformis_MP797         0
	dominans_MP648            3
	drakensbergensis_DB1443   3
	dregei_EO12711            0
	duthieae_ANA              0
	eburnea_MP1037            0
	ecklonii_EO12739          0
	elimensis_EO12843         0
	empetrina_EO12786         0
	equisetifolia_MP829       0
	erasmia_MP874             0
	eremioides_MP533          0
	ericoides_MP742           0
	erigena_a_ANA             1
	erinus_MP907              0
	eriophoros_EO12478        0
	esterhuyseniae_EO11831    0
	esteriana_EO12545         0
	eustacei_MP1259           0
	evansii_MP641             3
	excavata_GK1532           0
	exleeana_EO12499          0
	fascicularis_fac_MP809    0
	fastigiata_MP830          0
	fausta_MP663              0
	ferrea_EO12494            0
	filago_BG93               4
	filamentosa_EO12728       0
	fillipendula_fil_MP914    0
	fimbriata_MP606           0
	flacca_MP840              0
	floccifera_MP987          0
	florifera_EO12536         0
	fontana_MP1069            0
	frigida_MP658             3
	galioides_FN745           2
	garciae_MP1253            0
	georgica_ANA              0
	gerhardii_EO12700         0
	gibbosa_ANA               0
	glabella_la_EO11224       0
	glandulipila_MP521        0
	glandulosa_fou_ANA        0
	glaphyra_MP647            3
	glauca_gla_MP850          0
	globiceps_con_EO12519     0
	glomiflora_EO12548        0
	glutinosa_MP687           0
	gnaphaloides_MP511        0
	goatcheriana_dra_EO12694  0
	goudotiana_EO12636        2
	gracilipes_MM5014         0
	gracilis_BG622            0
	grata_MP879               0
	greyi_EO12501             0
	gysbertii_MP826           0
	haemastoma_MP871          0
	haematocodon_MP1033       0
	halicacaba_ANA            0
	hanekomii_EO11172         0
	hansfordii_MP1239         0
	hebeclada_EO12686         2
	heleogena_MP1064          0
	heleophila_ANA            0
	hendricksei_EO12524       0
	hermani_EO12498           0
	hexandra_RC465            4
	hibbertii_MP982           0
	hillburtii_EO12593        3
	hirtiflora_MP958          0
	hispidula_MP801           0
	hispiduloides_EO11544     0
	holosericea_EO12842       0
	holtii_TO                 3
	hottentotica_EO           0
	humbertii_EO12638         2
	humidicola_EO11353        0
	humifusa_MP846            0
	imbricata_MP688           0
	inaequalis_MP539          0
	incarnata_EO12771         0
	inflata_MP784             0
	infundibuliformis_MP1238  0
	ingeana_EO12759           0
	innovans_MP918            0
	inordinata_EO11823        0
	intermedia_MM5082         0
	interrupta_MP911          0
	ioniana_EO12781           0
	isaloensis_DB1253         2
	jasminiflora_EO12612      0
	johnstoniana_RC464        4
	jonasiana_MP985           0
	juniperina_SV952          0
	junonia_min_MP866         0
	karooica_MP1285           0
	karwyderi_EO12718         0
	kingaensis_rug_BB2981     4
	krugeri_EO12807           0
	labialis_MP696            0
	lachnaeifolia_MP994       0
	laeta_MP1045              0
	lambertii_ANA             0
	lanata_MP1220             0
	lanceolifera_RC463        4
	lasciva_MP906             0
	lateralis_MP721           0
	lateriflora_EO12482       0
	lavandulifolia_EO12506    0
	lehmannii_MP625           0
	leonis_RTsn               0
	lepidota_MP541            0
	leptopus_ANA              0
	leucanthera_EO12452       0
	leucodesmia_MP724         0
	leucopelta_EO12598        3
	leucosiphon_MP776         0
	leucotrachela_ANA         0
	lignosa_EO11763           0
	lithophila_MP1301         0
	loganii_MP1258            0
	longimontana_MP587        0
	lucida_MP690              0
	mackayana_b_ANA           1
	macowanii_mac_MP810       0
	macrotrema_MM4625         0
	madagascariensis_MP1086   2
	maderensis_AH             1
	maderi_MP757              0
	madida_MP573              0
	magistrati_EO11750        0
	magnisylvae_EO10708       0
	malmesburiensis_EO12575   0
	mammosaP_MP951            0
	manipuliflora_a_ANA       1
	margaritacea_ANA          0
	marifolia_CM4             0
	massonii_MP811            0
	mauritiensis_CB2632       2
	maximilianii_EO12484      0
	melanthera_MP610          0
	melastoma_mel_MP773       0
	microdonta_A5             4
	mira_MP1257               0
	modesta_ANA               0
	monadelphia_FO            0
	monsoniana_MP986          0
	montis_hominis_EO11827    0
	multiflexuosa_EO12445     0
	multiflora_a_ANA          1
	multumbellifera_MP822     0
	muscosa_MP775             0
	myriadenia_EO12679        2
	nabea_ANA                 0
	nana_ANA                  0
	natalitia_EO12514         3
	nematophylla_EO12747      0
	nemerosa_MP1208           0
	nervata_EO12541           0
	nevillei_MP1056           0
	nubigena_MP868            0
	nudiflora_MP802           0
	nutans_BG599              0
	oatesii_ANA               3
	oblongiflora_ANA          0
	obtusata_EO12458          0
	occulta_EO                0
	ocellata_MP574            0
	odorata_MP561             0
	oligantha_TdV86           0
	oliveri_MP1278            0
	oreotragus_ANA            0
	oresigena_MP759           0
	orientalis_EO12608        0
	ovina_EO12487             0
	oxycoccifolia_MP1275      0
	oxysepala_MP780           0
	pageana_ANA               0
	palliiflora_EO12533       0
	paniculata_MP1274         0
	pannosa_EO12490           0
	parilis_MP751             0
	parkeri_EO12682           2
	parviflora_EO12492        0
	parviporandra_MP877       0
	passerinae_MP1302         0
	patens_EO12457            0
	patersonii_a_ANA          0
	paucifolia_cil_EO12528    0
	pectinifolia_BG601        0
	peltata_MP1231            0
	penduliflora_MP923        0
	penicilliformis_MP889     0
	perlata_MP960             0
	perplexa_EO12788          0
	perrieri_EO12635          2
	perspicua_per_MP821       0
	petiolaris_EO12783        0
	petricola_MP996           0
	petrophila_EO7592         0
	phacelanthera_EO12489     0
	phaeocarpa_SM2003         0
	phillipsii_MP794          0
	physantha_MP1242          0
	physodes_ANA              0
	physophylla_EO11418       0
	pillansii_pil_MP813       0
	pinea_MP789               0
	piquetbergensis_MM5532    0
	placentiflora_EO12477     0
	planifolia_MP1012         0
	platycalyx_MP1243         0
	pleiotricha_RC461         4
	plukenetii_plu_EO         0
	plumigera_EO11341         0
	plumosa_EO12480           0
	podophylla_MP582          0
	pogonanthera_EO12835      0
	polycoma_FR               0
	praecox_MP795             0
	prolata_EO12748           0
	propendens_EO12464        0
	psittacina_IJ1237         3
	pubescens_EO12503         0
	pubigera_MP572            0
	pulchella_MP736           0
	pulvinata_MP1304          0
	pycnantha_MP1011          0
	pyxidiflora_ANA           0
	quadrangularis_MP620      0
	quadrisulcata_MP1031      0
	radicans_sch_MP1018       0
	rakotozafyana_EO12661     2
	recta_ANA                 0
	recurvifolia_EO12475a     0
	reenensis_MP661           3
	regerminans_MP576         0
	regia_reg_MP922           0
	remota_EO10386            0
	retorta_ANA               0
	reunionensis_FN744        2
	revoluta_BT13679          3
	rhodopis_BAB13            0
	rigidula_MP534            0
	riparia_MP908             0
	rivularis_BB13936         3
	rosacea_gla_BG628         0
	rubens_EO12479            0
	rubiginosa_RT1554         0
	rugata_EO12516            0
	russakiana_MP684          0
	rusticula_EO12471         0
	salteri_S2065             0
	savileae_MP975            0
	saxicola_EO12515          0
	scoparia_AH               1
	scytophylla_MP1021        0
	selaginifolia_EO12488     0
	senilis_EO12483           0
	serrata_MP818             0
	sessiliflora_MP604        0
	setacea_MP589             0
	shannonii_TdV262          0
	sicula_sic_AM             1
	silvatica_A2              4
	simii_RC466               3
	similis_MP804             0
	simulans_ANA              0
	sitiens_MP827             0
	sociorum_cf_MP1055        0
	solandri_EO12753          0
	sonderiana_MP756          0
	sparrmanii_ANA            0
	sparsa_BG602              0
	spectabilis_MP929         0
	sphaerocephala_MP848      0
	spiculifolia_AS57234      1
	sp_mad3_EO12632           2
	sp_mad5_EO12641           2
	sp_mitrastylus2_EO12691   2
	sp_muscosa_EO12639        2
	sp_nov_MP1291             0
	sp_pachysa_EO12720        0
	spumosa_MP978             0
	squarrosa_EO11742         0
	stagnalis_sta_MP668       0
	steinbergiana_EO12763     0
	stokoeanthus_EO4790       0
	stokoei_MP825             0
	straussiana_MP638         3
	strigilifolia_MP619       0
	strigosa_MP673            0
	stylaris_ANA              0
	subcapitata_MP1042        0
	subdivaricata_MP671       0
	subulata_MdV2             0
	subverticillaris_EO12625  3
	swaziensis_L1187          3
	tegulifolia_MP557         0
	tenuis_EO12491            0
	terminalis_a_ANA          1
	tetralix_c_ANA            1
	tetrathecoides_MP1252     0
	thamnoides_MP1211         0
	thimifolia_CM7            0
	thodei_MP656              3
	thomae_MP807              0
	thomensis_EO12615         4
	thunbergii_AH2612         0
	tomentosa_MP961           0
	toringbergensis_ANA       0
	totta_MP525               0
	tradouwensis_MP903        0
	transparens_MP893         0
	trichophora_EO12701       0
	trichophylla_EO10906      0
	trichroma_EO12517         0
	triflora_MP564            0
	trimera_MsnA              4
	tristis_MP932             0
	tumida_MP755              0
	turgida_S1962             0
	tysonii_EO12583           3
	uberiflora_BG586          0
	umbellata_DS              1
	umbelliflora_RT2182       0
	umbratica_EO12760         0
	unicolor_uni_MP1249       0
	unilateralis_MP1205       0
	urceolata_MP955           0
	urna_viridis_MP946        0
	ustulescens_RT1553        0
	uysii_ANA                 0
	vagans_MP972              1
	vallis_aranearum_ANA      0
	vallis_fluminis_EO12761   0
	velatiflora_EO12547       0
	ventricosa_MP713          0
	verecunda_CS5             0
	vernicosa_MP928           0
	versicolor_ver_MP1232     0
	verticillata_ANA          0
	vestita_EO12702           0
	villosa_EO11394           0
	viridiflora_MP1246        0
	viscaria_vis_MdV4         0
	walkeri_MP1237            0
	wendlandiana_EO12731      0
	whyteana_A4               4
	woodii_DB1444             3
	zebrensis_EO12787         0
	zeyheriana_EO             0
	zwartbergensis_MP608      0

;

END;
BEGIN TREES;
	Title Imported_trees;
	ID 015ec37afa0a1;
	LINK Taxa = Taxa;
	TRANSLATE
[0] 		n0 abietina_abi_MP1013,
[1] 		n1 accommodata_EO11382,
[2] 		n2 acuta_MP506,
[3] 		n3 adnata_MP501,
[4] 		n4 adunca_EO12746,
[5] 		n5 agglutinans_EO7679,
[6] 		n6 albens_ANA,
[7] 		n7 albertyniae_MP927,
[8] 		n8 albescens_MP898,
[9] 		n9 alexandri_EO12449,
[10] 		n10 alfredii_FR,
[11] 		n11 algida_MP645,
[12] 		n12 alopecurus_MP630,
[13] 		n13 amidae_EO12272,
[14] 		n14 amoena_MP1032,
[15] 		n15 ampullacea_MP1277,
[16] 		n16 aneimena_EO12757,
[17] 		n17 anguliger_MP597,
[18] 		n18 angulosa_S2105,
[19] 		n19 annectens_ANA,
[20] 		n20 arachnocalyx_EO12453,
[21] 		n21 arborea_EO12619,
[22] 		n22 arborescens_FM747,
[23] 		n23 arcuata_MP523,
[24] 		n24 ardens_MP1076,
[25] 		n25 areolata_EO12502,
[26] 		n26 argentea_EO12475,
[27] 		n27 artemisioides_MP551,
[28] 		n28 aspalathifolia_DB1408,
[29] 		n29 astroites_EO12758,
[30] 		n30 atherstonei_EO12261,
[31] 		n31 atromontana_EO12544,
[32] 		n32 atrovinosa_MP864,
[33] 		n33 australis_b_ANA,
[34] 		n34 autumnalis_MP665,
[35] 		n35 axillaris_MP1052,
[36] 		n36 axilliflora_MP916,
[37] 		n37 baccans_BG645,
[38] 		n38 banksii_com_ANA,
[39] 		n39 barbigeroides_MP735,
[40] 		n40 baroniana_cf_Lar8,
[41] 		n41 baueri_bau_MP1233,
[42] 		n42 benguelensis_A1,
[43] 		n43 benthamiana_MP560,
[44] 		n44 bergiana_MP768,
[45] 		n45 bicolor_MP1098,
[46] 		n46 blandfordii_MM4208,
[47] 		n47 blenna_ANA,
[48] 		n48 bodkinii_TdV204,
[49] 		n49 bojeri_MP1087,
[50] 		n50 bokkeveldia_EO12769,
[51] 		n51 bolusanthus_DEB1720,
[52] 		n52 bolusiae_ANA,
[53] 		n53 boutonii_EO12666,
[54] 		n54 brachialis_MP734,
[55] 		n55 brachysepala_EO12727,
[56] 		n56 bracteolaris_MP577,
[57] 		n57 brevifolia_EO12459,
[58] 		n58 bruniades_EO12465,
[59] 		n59 bruniifolia_EO12460,
[60] 		n60 caespitosa_MP642,
[61] 		n61 caffra_ANA,
[62] 		n62 caffrorum_MP644,
[63] 		n63 calcareophila_EO30159,
[64] 		n64 caledonica_JW103,
[65] 		n65 Calluna_vulgaris_ANA,
[66] 		n66 calycina_EO12532,
[67] 		n67 cameronii_ANA,
[68] 		n68 canaliculata_BG590,
[69] 		n69 canescens_ANA,
[70] 		n70 capensis_MP1047,
[71] 		n71 capillaris_MP1066,
[72] 		n72 capitata_ANA,
[73] 		n73 caprina_EO12772,
[74] 		n74 carnea_ATsn5,
[75] 		n75 caterviflora_EO12785,
[76] 		n76 cereris_MP863,
[77] 		n77 cerinthoides_ANA,
[78] 		n78 cernua_EO12474,
[79] 		n79 cetrata_EO12064,
[80] 		n80 chamissonis_RT2188,
[81] 		n81 chartacea_EO11408,
[82] 		n82 chionodes_EO11699,
[83] 		n83 chionophila_MP790,
[84] 		n84 chiroptera_MP814,
[85] 		n85 chrysocodon_ANA,
[86] 		n86 ciliaris_c_ANA,
[87] 		n87 cinerea_a_ANA,
[88] 		n88 clavisepala_ANA,
[89] 		n89 coacervata_MP761,
[90] 		n90 coarctata_ANA,
[91] 		n91 coarctata_MP590,
[92] 		n92 coccinea_coc_MP598,
[93] 		n93 collina_EO12613,
[94] 		n94 colorans_EO12717,
[95] 		n95 condensata_MP890,
[96] 		n96 conspicua_CS1,
[97] 		n97 cooperi_EO12588,
[98] 		n98 copiosa_BG610,
[99] 		n99 cordata_MP571,
[100] 		n100 corifolia_ANA,
[101] 		n101 corydalis_MP1005,
[102] 		n102 cristata_MP820,
[103] 		n103 cruenta_MP745,
[104] 		n104 cryptoclada_EO12684,
[105] 		n105 cubica_MP623,
[106] 		n106 cumuliflora_EO12699,
[107] 		n107 curtophylla_EO12750,
[108] 		n108 curviflora_MP765,
[109] 		n109 curvifolia_MP700,
[110] 		n110 curvirostris_MP817,
[111] 		n111 cyathiformis_a_ANA,
[112] 		n112 cylindrica_MP1240,
[113] 		n113 cyrilliflora_CM10,
[114] 		n114 Daboecia_cantabrica_ANA,
[115] 		n115 daphniflora_MP567,
[116] 		n116 deflexa_MP1247,
[117] 		n117 demissa_EO12540,
[118] 		n118 densifolia_BG591,
[119] 		n119 denticulata_MP799,
[120] 		n120 depressa_MP942,
[121] 		n121 desmantha_MP562,
[122] 		n122 dianthifolia_MP583,
[123] 		n123 diaphana_BG611,
[124] 		n124 discolor_heb_MP1214,
[125] 		n125 dispar_EO12749,
[126] 		n126 dissimulans_EO12596,
[127] 		n127 distorta_EO12500,
[128] 		n128 dodii_EO11417,
[129] 		n129 dolfiana_MP1297,
[130] 		n130 doliiformis_MP797,
[131] 		n131 dominans_MP648,
[132] 		n132 drakensbergensis_DB1443,
[133] 		n133 dregei_EO12711,
[134] 		n134 duthieae_ANA,
[135] 		n135 eburnea_MP1037,
[136] 		n136 ecklonii_EO12739,
[137] 		n137 elimensis_EO12843,
[138] 		n138 empetrina_EO12786,
[139] 		n139 equisetifolia_MP829,
[140] 		n140 erasmia_MP874,
[141] 		n141 eremioides_MP533,
[142] 		n142 ericoides_MP742,
[143] 		n143 erigena_a_ANA,
[144] 		n144 erinus_MP907,
[145] 		n145 eriophoros_EO12478,
[146] 		n146 esterhuyseniae_EO11831,
[147] 		n147 esteriana_EO12545,
[148] 		n148 eustacei_MP1259,
[149] 		n149 evansii_MP641,
[150] 		n150 excavata_GK1532,
[151] 		n151 exleeana_EO12499,
[152] 		n152 fascicularis_fac_MP809,
[153] 		n153 fastigiata_MP830,
[154] 		n154 fausta_MP663,
[155] 		n155 ferrea_EO12494,
[156] 		n156 filago_BG93,
[157] 		n157 filamentosa_EO12728,
[158] 		n158 fillipendula_fil_MP914,
[159] 		n159 fimbriata_MP606,
[160] 		n160 flacca_MP840,
[161] 		n161 floccifera_MP987,
[162] 		n162 florifera_EO12536,
[163] 		n163 fontana_MP1069,
[164] 		n164 frigida_MP658,
[165] 		n165 galioides_FN745,
[166] 		n166 garciae_MP1253,
[167] 		n167 georgica_ANA,
[168] 		n168 gerhardii_EO12700,
[169] 		n169 gibbosa_ANA,
[170] 		n170 glabella_la_EO11224,
[171] 		n171 glandulipila_MP521,
[172] 		n172 glandulosa_fou_ANA,
[173] 		n173 glaphyra_MP647,
[174] 		n174 glauca_gla_MP850,
[175] 		n175 globiceps_con_EO12519,
[176] 		n176 glomiflora_EO12548,
[177] 		n177 glutinosa_MP687,
[178] 		n178 gnaphaloides_MP511,
[179] 		n179 goatcheriana_dra_EO12694,
[180] 		n180 goudotiana_EO12636,
[181] 		n181 gracilipes_MM5014,
[182] 		n182 gracilis_BG622,
[183] 		n183 grata_MP879,
[184] 		n184 greyi_EO12501,
[185] 		n185 gysbertii_MP826,
[186] 		n186 haemastoma_MP871,
[187] 		n187 haematocodon_MP1033,
[188] 		n188 halicacaba_ANA,
[189] 		n189 hanekomii_EO11172,
[190] 		n190 hansfordii_MP1239,
[191] 		n191 hebeclada_EO12686,
[192] 		n192 heleogena_MP1064,
[193] 		n193 heleophila_ANA,
[194] 		n194 hendricksei_EO12524,
[195] 		n195 hermani_EO12498,
[196] 		n196 hexandra_RC465,
[197] 		n197 hibbertii_MP982,
[198] 		n198 hillburtii_EO12593,
[199] 		n199 hirtiflora_MP958,
[200] 		n200 hispidula_MP801,
[201] 		n201 hispiduloides_EO11544,
[202] 		n202 holosericea_EO12842,
[203] 		n203 holtii_TO,
[204] 		n204 hottentotica_EO,
[205] 		n205 humbertii_EO12638,
[206] 		n206 humidicola_EO11353,
[207] 		n207 humifusa_MP846,
[208] 		n208 imbricata_MP688,
[209] 		n209 inaequalis_MP539,
[210] 		n210 incarnata_EO12771,
[211] 		n211 inflata_MP784,
[212] 		n212 infundibuliformis_MP1238,
[213] 		n213 ingeana_EO12759,
[214] 		n214 innovans_MP918,
[215] 		n215 inordinata_EO11823,
[216] 		n216 intermedia_MM5082,
[217] 		n217 interrupta_MP911,
[218] 		n218 ioniana_EO12781,
[219] 		n219 isaloensis_DB1253,
[220] 		n220 jasminiflora_EO12612,
[221] 		n221 johnstoniana_RC464,
[222] 		n222 jonasiana_MP985,
[223] 		n223 juniperina_SV952,
[224] 		n224 junonia_min_MP866,
[225] 		n225 karooica_MP1285,
[226] 		n226 karwyderi_EO12718,
[227] 		n227 kingaensis_rug_BB2981,
[228] 		n228 krugeri_EO12807,
[229] 		n229 labialis_MP696,
[230] 		n230 lachnaeifolia_MP994,
[231] 		n231 laeta_MP1045,
[232] 		n232 lambertii_ANA,
[233] 		n233 lanata_MP1220,
[234] 		n234 lanceolifera_RC463,
[235] 		n235 lasciva_MP906,
[236] 		n236 lateralis_MP721,
[237] 		n237 lateriflora_EO12482,
[238] 		n238 lavandulifolia_EO12506,
[239] 		n239 lehmannii_MP625,
[240] 		n240 leonis_RTsn,
[241] 		n241 lepidota_MP541,
[242] 		n242 leptopus_ANA,
[243] 		n243 leucanthera_EO12452,
[244] 		n244 leucodesmia_MP724,
[245] 		n245 leucopelta_EO12598,
[246] 		n246 leucosiphon_MP776,
[247] 		n247 leucotrachela_ANA,
[248] 		n248 lignosa_EO11763,
[249] 		n249 lithophila_MP1301,
[250] 		n250 loganii_MP1258,
[251] 		n251 longimontana_MP587,
[252] 		n252 lucida_MP690,
[253] 		n253 mackayana_b_ANA,
[254] 		n254 macowanii_mac_MP810,
[255] 		n255 macrotrema_MM4625,
[256] 		n256 madagascariensis_MP1086,
[257] 		n257 maderensis_AH,
[258] 		n258 maderi_MP757,
[259] 		n259 madida_MP573,
[260] 		n260 magistrati_EO11750,
[261] 		n261 magnisylvae_EO10708,
[262] 		n262 malmesburiensis_EO12575,
[263] 		n263 mammosaP_MP951,
[264] 		n264 manipuliflora_a_ANA,
[265] 		n265 margaritacea_ANA,
[266] 		n266 marifolia_CM4,
[267] 		n267 massonii_MP811,
[268] 		n268 mauritiensis_CB2632,
[269] 		n269 maximilianii_EO12484,
[270] 		n270 melanthera_MP610,
[271] 		n271 melastoma_mel_MP773,
[272] 		n272 microdonta_A5,
[273] 		n273 mira_MP1257,
[274] 		n274 modesta_ANA,
[275] 		n275 monadelphia_FO,
[276] 		n276 monsoniana_MP986,
[277] 		n277 montis_hominis_EO11827,
[278] 		n278 multiflexuosa_EO12445,
[279] 		n279 multiflora_a_ANA,
[280] 		n280 multumbellifera_MP822,
[281] 		n281 muscosa_MP775,
[282] 		n282 myriadenia_EO12679,
[283] 		n283 nabea_ANA,
[284] 		n284 nana_ANA,
[285] 		n285 natalitia_EO12514,
[286] 		n286 nematophylla_EO12747,
[287] 		n287 nemerosa_MP1208,
[288] 		n288 nervata_EO12541,
[289] 		n289 nevillei_MP1056,
[290] 		n290 nubigena_MP868,
[291] 		n291 nudiflora_MP802,
[292] 		n292 nutans_BG599,
[293] 		n293 oatesii_ANA,
[294] 		n294 oblongiflora_ANA,
[295] 		n295 obtusata_EO12458,
[296] 		n296 occulta_EO,
[297] 		n297 ocellata_MP574,
[298] 		n298 odorata_MP561,
[299] 		n299 oligantha_TdV86,
[300] 		n300 oliveri_MP1278,
[301] 		n301 oreotragus_ANA,
[302] 		n302 oresigena_MP759,
[303] 		n303 orientalis_EO12608,
[304] 		n304 ovina_EO12487,
[305] 		n305 oxycoccifolia_MP1275,
[306] 		n306 oxysepala_MP780,
[307] 		n307 pageana_ANA,
[308] 		n308 palliiflora_EO12533,
[309] 		n309 paniculata_MP1274,
[310] 		n310 pannosa_EO12490,
[311] 		n311 parilis_MP751,
[312] 		n312 parkeri_EO12682,
[313] 		n313 parviflora_EO12492,
[314] 		n314 parviporandra_MP877,
[315] 		n315 passerinae_MP1302,
[316] 		n316 patens_EO12457,
[317] 		n317 patersonii_a_ANA,
[318] 		n318 paucifolia_cil_EO12528,
[319] 		n319 pectinifolia_BG601,
[320] 		n320 peltata_MP1231,
[321] 		n321 penduliflora_MP923,
[322] 		n322 penicilliformis_MP889,
[323] 		n323 perlata_MP960,
[324] 		n324 perplexa_EO12788,
[325] 		n325 perrieri_EO12635,
[326] 		n326 perspicua_per_MP821,
[327] 		n327 petiolaris_EO12783,
[328] 		n328 petricola_MP996,
[329] 		n329 petrophila_EO7592,
[330] 		n330 phacelanthera_EO12489,
[331] 		n331 phaeocarpa_SM2003,
[332] 		n332 phillipsii_MP794,
[333] 		n333 physantha_MP1242,
[334] 		n334 physodes_ANA,
[335] 		n335 physophylla_EO11418,
[336] 		n336 pillansii_pil_MP813,
[337] 		n337 pinea_MP789,
[338] 		n338 piquetbergensis_MM5532,
[339] 		n339 placentiflora_EO12477,
[340] 		n340 planifolia_MP1012,
[341] 		n341 platycalyx_MP1243,
[342] 		n342 pleiotricha_RC461,
[343] 		n343 plukenetii_plu_EO,
[344] 		n344 plumigera_EO11341,
[345] 		n345 plumosa_EO12480,
[346] 		n346 podophylla_MP582,
[347] 		n347 pogonanthera_EO12835,
[348] 		n348 polycoma_FR,
[349] 		n349 praecox_MP795,
[350] 		n350 prolata_EO12748,
[351] 		n351 propendens_EO12464,
[352] 		n352 psittacina_IJ1237,
[353] 		n353 pubescens_EO12503,
[354] 		n354 pubigera_MP572,
[355] 		n355 pulchella_MP736,
[356] 		n356 pulvinata_MP1304,
[357] 		n357 pycnantha_MP1011,
[358] 		n358 pyxidiflora_ANA,
[359] 		n359 quadrangularis_MP620,
[360] 		n360 quadrisulcata_MP1031,
[361] 		n361 radicans_sch_MP1018,
[362] 		n362 rakotozafyana_EO12661,
[363] 		n363 recta_ANA,
[364] 		n364 recurvifolia_EO12475a,
[365] 		n365 reenensis_MP661,
[366] 		n366 regerminans_MP576,
[367] 		n367 regia_reg_MP922,
[368] 		n368 remota_EO10386,
[369] 		n369 retorta_ANA,
[370] 		n370 reunionensis_FN744,
[371] 		n371 revoluta_BT13679,
[372] 		n372 rhodopis_BAB13,
[373] 		n373 rigidula_MP534,
[374] 		n374 riparia_MP908,
[375] 		n375 rivularis_BB13936,
[376] 		n376 rosacea_gla_BG628,
[377] 		n377 rubens_EO12479,
[378] 		n378 rubiginosa_RT1554,
[379] 		n379 rugata_EO12516,
[380] 		n380 russakiana_MP684,
[381] 		n381 rusticula_EO12471,
[382] 		n382 salteri_S2065,
[383] 		n383 savileae_MP975,
[384] 		n384 saxicola_EO12515,
[385] 		n385 scoparia_AH,
[386] 		n386 scytophylla_MP1021,
[387] 		n387 selaginifolia_EO12488,
[388] 		n388 senilis_EO12483,
[389] 		n389 serrata_MP818,
[390] 		n390 sessiliflora_MP604,
[391] 		n391 setacea_MP589,
[392] 		n392 shannonii_TdV262,
[393] 		n393 sicula_sic_AM,
[394] 		n394 silvatica_A2,
[395] 		n395 simii_RC466,
[396] 		n396 similis_MP804,
[397] 		n397 simulans_ANA,
[398] 		n398 sitiens_MP827,
[399] 		n399 sociorum_cf_MP1055,
[400] 		n400 solandri_EO12753,
[401] 		n401 sonderiana_MP756,
[402] 		n402 sparrmanii_ANA,
[403] 		n403 sparsa_BG602,
[404] 		n404 spectabilis_MP929,
[405] 		n405 sphaerocephala_MP848,
[406] 		n406 spiculifolia_AS57234,
[407] 		n407 sp_mad3_EO12632,
[408] 		n408 sp_mad5_EO12641,
[409] 		n409 sp_mitrastylus2_EO12691,
[410] 		n410 sp_muscosa_EO12639,
[411] 		n411 sp_nov_MP1291,
[412] 		n412 sp_pachysa_EO12720,
[413] 		n413 spumosa_MP978,
[414] 		n414 squarrosa_EO11742,
[415] 		n415 stagnalis_sta_MP668,
[416] 		n416 steinbergiana_EO12763,
[417] 		n417 stokoeanthus_EO4790,
[418] 		n418 stokoei_MP825,
[419] 		n419 straussiana_MP638,
[420] 		n420 strigilifolia_MP619,
[421] 		n421 strigosa_MP673,
[422] 		n422 stylaris_ANA,
[423] 		n423 subcapitata_MP1042,
[424] 		n424 subdivaricata_MP671,
[425] 		n425 subulata_MdV2,
[426] 		n426 subverticillaris_EO12625,
[427] 		n427 swaziensis_L1187,
[428] 		n428 tegulifolia_MP557,
[429] 		n429 tenuis_EO12491,
[430] 		n430 terminalis_a_ANA,
[431] 		n431 tetralix_c_ANA,
[432] 		n432 tetrathecoides_MP1252,
[433] 		n433 thamnoides_MP1211,
[434] 		n434 thimifolia_CM7,
[435] 		n435 thodei_MP656,
[436] 		n436 thomae_MP807,
[437] 		n437 thomensis_EO12615,
[438] 		n438 thunbergii_AH2612,
[439] 		n439 tomentosa_MP961,
[440] 		n440 toringbergensis_ANA,
[441] 		n441 totta_MP525,
[442] 		n442 tradouwensis_MP903,
[443] 		n443 transparens_MP893,
[444] 		n444 trichophora_EO12701,
[445] 		n445 trichophylla_EO10906,
[446] 		n446 trichroma_EO12517,
[447] 		n447 triflora_MP564,
[448] 		n448 trimera_MsnA,
[449] 		n449 tristis_MP932,
[450] 		n450 tumida_MP755,
[451] 		n451 turgida_S1962,
[452] 		n452 tysonii_EO12583,
[453] 		n453 uberiflora_BG586,
[454] 		n454 umbellata_DS,
[455] 		n455 umbelliflora_RT2182,
[456] 		n456 umbratica_EO12760,
[457] 		n457 unicolor_uni_MP1249,
[458] 		n458 unilateralis_MP1205,
[459] 		n459 urceolata_MP955,
[460] 		n460 urna_viridis_MP946,
[461] 		n461 ustulescens_RT1553,
[462] 		n462 uysii_ANA,
[463] 		n463 vagans_MP972,
[464] 		n464 vallis_aranearum_ANA,
[465] 		n465 vallis_fluminis_EO12761,
[466] 		n466 velatiflora_EO12547,
[467] 		n467 ventricosa_MP713,
[468] 		n468 verecunda_CS5,
[469] 		n469 vernicosa_MP928,
[470] 		n470 versicolor_ver_MP1232,
[471] 		n471 verticillata_ANA,
[472] 		n472 vestita_EO12702,
[473] 		n473 villosa_EO11394,
[474] 		n474 viridiflora_MP1246,
[475] 		n475 viscaria_vis_MdV4,
[476] 		n476 walkeri_MP1237,
[477] 		n477 wendlandiana_EO12731,
[478] 		n478 whyteana_A4,
[479] 		n479 woodii_DB1444,
[480] 		n480 zebrensis_EO12787,
[481] 		n481 zeyheriana_EO,
[482] 		n482 zwartbergensis_MP608;
	TREE 'Imported tree 1++' = ((((n406:0.017440239049704286,(((n430:0.01842976935760355,(n279:0.01518424246350718,((n264:0.004422693473392663,n463:0.0037978680943365913):0.00510564057383057,n385:0.009889401001404136):0.003915005422006228):0.0014657027546094849):0.00010948782469971447,(n74:0.010411451465086057,n143:0.015497446946066409):0.0023203372756759313):0.00046136559298370666,(n86:0.018420258165532458,(n431:0.012052644367721105,n253:0.010039026931765444):0.004660460320671753):0.002452253146679899):0.0011545152819117351):0.0007301611306655111,(((n33:0.01787302148242998,((n21:0.004875601742307444,n448:0.006593593660261459):0.0006386794991555331,(((((n268:0.0032228984405026423,(((((n370:0.0006248520536301132,((n325:0.0054107149865131945,(n282:0.0007898965101691662,n40:0.0027512254559219113):0.0005243225686736825):0.00024012445009712174,n191:0.0034071357484652663):0.000417831242981715):0.00000100000050002909,n180:0.0019228128480344338):0.00046034505458233423,(((n104:0.0018023836934803344,n407:0.00467413405574247):0.00000100000050002909,n22:0.004120141031680667):0.00000100000050002909,(n219:0.0032371254658458875,(n312:0.0020333140308493075,(n409:0.0009701992890932487,n53:0.005729194051769203):0.0014748480307130204):0.00000100000050002909):0.0017291999977535218):0.00000100000050002909):0.0009299329940536949,(n408:0.00000100000050002909,n410:0.001657694748641805):0.0026051070393685338):0.00000100000050002909,n362:0.004215333937018906):0.000938018532371501):0.0002316792608238499,((n256:0.008898956582157416,n205:0.00000100000050002909):0.001192104743317762,(n165:0.0015798809044760514,n49:0.0023115370054084157):0.0023505709302330422):0.0002020786822965553):0.0031814470753230837,(n227:0.004662115727438779,((n395:0.0042597830723751316,(n196:0.008220771377858942,(n42:0.00028653758334504253,n437:0.00487936963282059):0.0008360603669693331):0.001068960461214211):0.00000100000050002909,n272:0.014083600997170001):0.003989874149697563):0.0001671059833691323):0.0005930568170520744,(n62:0.005624154169792016,(n478:0.00886992492412667,((n427:0.0053182618612962,n203:0.006841825497819791):0.010665372743525898,((n198:0.0049585538666381814,n132:0.008156932315224593):0.001614586455673708,(((n479:0.009777118205927405,n426:0.005779605445468158):0.0015836322418606988,((((((n97:0.0071384157925559215,n452:0.0042724352980296025):0.0004301491149378163,(n293:0.003364452643287896,(n126:0.0021454372277260937,n173:0.0003988585390502677):0.0007426704647793104):0.000259248533571919):0.0004354994786998786,(((n371:0.0015821372038563849,n30:0.007308320685007434):0.0008210933977656336,n375:0.0020620187359603422):0.0030201179115154097,(n365:0.00000100000050002909,n164:0.00038485525609252026):0.002296220572130532):0.0009454197914163813):0.00000100000050002909,(n435:0.004322085488692299,n131:0.0019477590190579805):0.001532389529953976):0.00000100000050002909,(n419:0.004564631539110112,n352:0.0018182805616756132):0.0012771128863779976):0.00000100000050002909,n11:0.007283510907512631):0.0003187594189675459):0.0001576296951513748,((n149:0.004913462338340726,((n221:0.0016512750794289168,(n234:0.00000100000050002909,n342:0.00000100000050002909):0.00000100000050002909):0.0026936591133014773,(n156:0.006884073537399016,n394:0.00000100000050002909):0.0024788880341137668):0.0019585649516822095):0.00000100000050002909,(n28:0.008936058485556946,n12:0.005835559514202913):0.000934168780544657):0.00000100000050002909):0.0007147746343336003):0.0003577407100597329):0.00000100000050002909):0.0013087859935554994):0.0009524793324430255):0.0005069462966924792,(((((n341:0.009829009029512184,(n193:0.00000100000050002909,((n167:0.00000100000050002909,n29:0.00000100000050002909):0.004758871494651771,n6:0.00000100000050002909):0.00000200000100005818):0.004637285736870674):0.0019954425679071263,(((n16:0.007518305365533532,n61:0.005683625203053059):0.000772892665131391,(((n466:0.0022928693354795217,((n223:0.010005730240399285,n239:0.0038658140166443382):0.00000100000050002909,n233:0.010453981087916115):0.00000100000050002909):0.001522278665664156,(n433:0.007074938918574899,(((((n47:0.00000100000050002909,n24:0.0035242188588683145):0.0033446644755782177,(((n13:0.002117636285922751,((((n350:0.00000100000050002909,n470:0.00000100000050002909):0.0005249467116629537,n457:0.0019203372019396528):0.00000300000150008727,n363:0.00000100000050002909):0.00000100000050002909,(n124:0.00169054651658571,n123:0.0005215369010171137):0.0021203857862480374):0.0020938629482417604):0.0013885349518832828,n333:0.0019154885034703964):0.00000100000050002909,(n294:0.00000100000050002909,n404:0.0033965771076639867):0.004205860741091274):0.00209686781425098):0.000432183430838589,(n232:0.003336148987834725,(n412:0.005368191943460654,(n482:0.00052900110384507,(n148:0.004792179573753465,n176:0.0004436496143642556):0.00000100000050002909):0.0022173922847390742):0.001330894114551747):0.0004650485300767369):0.0004321187536644577,(n474:0.0032398929740863,n4:0.0032880071106448877):0.001879325887184557):0.00000100000050002909,n159:0.011983589961189822):0.00042323622472076143):0.00044513714365541457):0.0005404997588458673,(n68:0.0026664337010059696,(n354:0.011319219655837754,(n116:0.0010542110433441343,(n477:0.0010674955372852696,(n465:0.004122233091863261,n118:0.0026125221811995124):0.0015710958952613954):0.00000100000050002909):0.0005051660245377576):0.0026198681174519783):0.002514872431655219):0.0004520468091420959):0.0006286785118346356,(((n376:0.0055472393781586665,(n303:0.00539675608702778,n458:0.004482178797543561):0.001113907302159821):0.002134819922099904,n249:0.008425396394301194):0.00000100000050002909,n147:0.004141982883914164):0.0009858600085508292):0.00000100000050002909):0.0016231308555679838,(((n456:0.00215634971726857,n411:0.0073644963240950805):0.0016764795125903615,(n290:0.0015945093953130371,n215:0.00506812255830989):0.0036495465922702273):0.0003665912033463953,(n146:0.0012168674999769155,n82:0.0053369973043250465):0.008290078431599334):0.0007558051806260924):0.00000100000050002909,(((((n248:0.0012007596148155518,n129:0.00217324079816842):0.004214569379829236,(n251:0.00382422090717262,n95:0.0071149019194063174):0.002019785342161594):0.00000100000050002909,((n183:0.0005269491453214778,((n99:0.0010522194849366725,n200:0.0011492728524796598):0.002110281846692107,(n442:0.00425727037547406,(n98:0.005646456544255861,(n285:0.0038538726798017582,n245:0.0016819377592134119):0.00000100000050002909):0.00511791187550991):0.002481674296981478):0.0006243407341252755):0.002258876527057431,((n270:0.0017672742082164876,n274:0.0012197123684669258):0.002340008049571831,n297:0.0063267935699085134):0.002481795629215419):0.0007545390870928112):0.000516298273674702,(((n35:0.00000100000050002909,n18:0.00000200000100005818):0.006030249159417604,(((n184:0.008268945640763083,(n20:0.0018306791585330777,n76:0.0023184296242660823):0.0026951382112449106):0.016003314479581646,n302:0.002721944170081581):0.0010048207239054191,(((n438:0.005457020922656321,n224:0.0035059917443815668):0.0033160335946960857,(((n306:0.002731379027882557,(n405:0.0028461776144883197,n258:0.00000100000050002909):0.0010864204276631662):0.00000100000050002909,n425:0.005758040186169108):0.0015040440212017883,(n210:0.005413591703771844,((n78:0.003247372981803139,(n440:0.0033382822048552514,(n377:0.004800062186464771,n468:0.0017592692496965858):0.002046250968843122):0.00048192850012170887):0.00000100000050002909,(n32:0.0021941908450516055,n211:0.0011885949324783919):0.0006525488986349268):0.00000100000050002909):0.0006073993354707019):0.0014076069575530811):0.0007316203861973647,(((((((n50:0.010481550016899776,n237:0.006805336421396919):0.00038160125450269124,n273:0.012660097235048327):0.00000100000050002909,((n14:0.00000100000050002909,n434:0.0005277890204089915):0.0005275237372558477,n340:0.00000200000100005818):0.011280583614952367):0.001588040626066756,((n89:0.0086785146894894,n141:0.010303613013749435):0.00000100000050002909,(n238:0.0027017267110443035,n255:0.001551500112969931):0.006453620159602144):0.00000100000050002909):0.0010488396423287358,(((((n145:0.004444994856385611,n388:0.001050106811235686):0.00969309404522603,(n189:0.0074223798607209665,n450:0.011290136954874767):0.0022610857940088807):0.0016130059434180867,(n441:0.00277384367490697,n345:0.017537249577018837):0.000399749772461781):0.0005262509903401867,n209:0.015950336961120828):0.0016225817408113115,n160:0.008352835693270964):0.00000100000050002909):0.00000100000050002909,(n364:0.006735487586167837,n73:0.008862280860489834):0.00000100000050002909):0.00000100000050002909,(n26:0.014060826224241638,(n381:0.008953846978852476,n79:0.005230573584402763):0.00000100000050002909):0.000928349884634637):0.0006399561587577528):0.0012502554671084784):0.0012760193891866427):0.0005539010115312953,(((n481:0.005269096101040068,(n455:0.008376288810005732,(n23:0.009298689014363065,n117:0.003974000152860006):0.006231217416208312):0.0038556772236922852):0.0024071290768031503,(((((((n128:0.004231684843335569,(n445:0.003854613299908927,n443:0.0022869753402053558):0.0012073454525112772):0.0041495687813382955,n134:0.0011929152064053246):0.0011706213318622356,n366:0.0074960808807725396):0.00000100000050002909,(((n110:0.0016501500369479245,(n186:0.002327208730659231,n236:0.005132827031383533):0.00000100000050002909):0.0016245303528294693,(n349:0.008132676109137876,(n467:0.0011056539779037903,n383:0.0016092848443923526):0.0027554884484086257):0.00041829947166948067):0.002946263837459096,(n44:0.00909785863645349,n83:0.0029379859459617726):0.0018771003400108427):0.0008469123331676794):0.00000100000050002909,(n305:0.015869340125485444,((n336:0.006879456629665616,n313:0.0008200413231916013):0.0025278750868841194,((n19:0.00000100000050002909,(n471:0.00425770986255544,(n96:0.00000100000050002909,n108:0.0011017075126023145):0.0030444202300292495):0.0002795015853600073):0.00000100000050002909,(((n94:0.0016390992035328353,((((n444:0.0011287023975637867,n326:0.0010942266041883174):0.00000100000050002909,n351:0.004707961596330236):0.0010952466665744072,n194:0.0022673267870880753):0.0005446563512488913,n190:0.0021452349958306274):0.00000100000050002909):0.00000100000050002909,n301:0.004718539625912067):0.001174403918358677,((n382:0.0038620418419083175,(n163:0.0016252027581003092,(n113:0.00000100000050002909,n192:0.00000100000050002909):0.0005422358352433856):0.0005397939244283364):0.00054159387606906,((n254:0.0021978287923136064,(n247:0.0012299799607777147,n307:0.00000100000050002909):0.0008152195877125789):0.0003830733179309055,(n415:0.00000100000050002909,n85:0.0016221700842366622):0.001946219539358065):0.00000100000050002909):0.0008847112610952777):0.0010654319668854132):0.0014846416021230134):0.0011070317823598907):0.0008124639156938478):0.0010275723460428116,((((n451:0.008290317934216761,(((n204:0.00000100000050002909,n206:0.0005626497693533052):0.01006500513279975,n127:0.011979689366097336):0.0019798848849501252,((n153:0.004631616446338398,(n284:0.0023839972861234337,(((n228:0.009609042255742559,n112:0.00000100000050002909):0.00000100000050002909,n46:0.00054364379999758):0.00000100000050002909,(n119:0.00000100000050002909,(n212:0.00000100000050002909,n115:0.00000100000050002909):0.00000100000050002909):0.0002984712133382003):0.0002974830041607996):0.00029304460890853943):0.00000100000050002909,((n168:0.010142830430138559,n476:0.0017277317497320266):0.0010746477788422006,((n464:0.00268678971879357,n317:0.0032865667117811057):0.0006004854276951327,((n280:0.0023826664160046794,(n111:0.00036956867931787243,(n359:0.0005311601387415626,n182:0.0046192866390150225):0.00000100000050002909):0.005994005380874429):0.00041135472179225444,(((n34:0.00000100000050002909,n398:0.00000100000050002909):0.00000100000050002909,n424:0.00000100000050002909):0.0040520585253677735,((n231:0.00000100000050002909,n70:0.00000100000050002909):0.00000100000050002909,n135:0.00000100000050002909):0.007016768132522917):0.0016481246414635504):0.00031317169808771605):0.00028728491384777237):0.00000100000050002909):0.0006522302838305315):0.0007142174076049537):0.0006024165837266676,(n334:0.0005976352395370572,n460:0.0012443786208172465):0.005330604821076739):0.00018458674706376226,(n88:0.012171636742248249,((n155:0.006966552745575298,((n69:0.0006082439262630954,n75:0.00000100000050002909):0.0036461675077901217,(n199:0.0011944023344014159,n187:0.000561617114479101):0.0016426949612477267):0.000471096110663087):0.00000100000050002909,((n9:0.009095196741648,n52:0.005517074700662718):0.001916764565932399,(n138:0.0016778281879676047,n358:0.001572975456853179):0.0007959643162020782):0.00027109044994937673):0.0005995144989682777):0.0011608743873959934):0.0006902710877389,(((n188:0.001137457053165567,(n37:0.005619938320413172,n54:0.002739279276583874):0.0008015272312764877):0.0012220632313839066,(n399:0.0012378981741056473,n120:0.0027570603063887555):0.002336775698389532):0.0006767280559573748,n177:0.009809742741074845):0.002581217329321088):0.00016205069084789705):0.0015032012242755602,((n298:0.0065199553954456224,((n369:0.00125697509626393,((n414:0.0038662617532666892,n267:0.0016257860690081433):0.00000100000050002909,n185:0.00000100000050002909):0.0019826645719664307):0.0035988212671008144,(n220:0.002901300830617676,(n392:0.003469714323042656,n15:0.005030885002697261):0.0015617817451116772):0.002177890694462721):0.0020565066242990786):0.00000100000050002909,((n446:0.00301337440533327,(n102:0.00000100000050002909,n109:0.0010666546466712255):0.0008484335275373237):0.006023299609749684,((((n93:0.001597235979758929,n418:0.008338743252318368):0.004339175395266637,(n103:0.00000100000050002909,n137:0.00000100000050002909):0.008159404235770882):0.0020386391380518933,(n311:0.005660491617772117,((n436:0.0015918273632321376,((n130:0.008242812191902624,n332:0.004650869578911036):0.0032483872737219845,((n360:0.0005538599172252153,n289:0.0017524585365577717):0.00000100000050002909,n0:0.0004930702769864436):0.0004888979135711477):0.0003829580692868318):0.00000100000050002909,(((n472:0.00000100000050002909,(n286:0.002176050356861237,n157:0.0005795506411450056):0.0010644664035538124):0.00026574127060886464,(n337:0.0005325713911429024,n197:0.0026428649677594698):0.00000200000100005818):0.0003551478946917172,(n475:0.0005902498198085387,(n36:0.0010960199884229894,n367:0.00000100000050002909):0.00029624518726208566):0.00000100000050002909):0.0017646796609856743):0.0002628596502235646):0.0011193028754655705):0.0019840014517987213,(n64:0.018113602780740423,(((n10:0.007236128503624272,(n416:0.0021861993638720486,n56:0.0018983923881053836):0.0019439760938779467):0.0005001038103608371,n174:0.009252285373910384):0.00000100000050002909,(((n250:0.0009567809175585516,n140:0.0014366579679041002):0.0037881525556876777,n100:0.003614375913591851):0.00000100000050002909,n357:0.0066579788926972045):0.0018021332732901536):0.001563381897632098):0.0019972168299550916):0.0009559972252283329):0.00000100000050002909):0.00015200771710177313):0.00022863533068755742):0.0003983911060807772,(((((n449:0.008104002076403112,((n225:0.001239312481823748,n60:0.0009318841993591403):0.007734803438309307,n346:0.008688518135248796):0.000292318130645949):0.00000100000050002909,n259:0.006162142243615084):0.0011877357783478693,((n459:0.0035486212561816393,((n244:0.00211233943822018,n269:0.01239978711088843):0.0039006889200900157,n469:0.010541361868466685):0.0009460501546569412):0.00000100000050002909,n314:0.003908165670445244):0.00038676854612141963):0.00000100000050002909,((((n403:0.001746000358479381,n320:0.003631273216223152):0.001641755582581171,(n166:0.012423332880023875,(n480:0.0037913267259616986,n287:0.008940410726514532):0.0019489604562914625):0.0015629002560912332):0.0012962283807010898,n8:0.004609357060281702):0.0008094017865655231,((((n41:0.0013600328934924588,(n390:0.006076000586000598,n263:0.0005311771835048376):0.001595965260267034):0.0031611518510342015,((((n356:0.0016561624204436403,(n158:0.0015947383018456772,n321:0.00000200000100005818):0.0026083772818251256):0.004574048075253978,(n150:0.0010830788208550533,n63:0.00000100000050002909):0.0026553592811686304):0.00000100000050002909,(((n170:0.002549517550597816,(n361:0.001794026793675021,n217:0.0014767539592882933):0.0005280486609895109):0.0006636025498344858,(n7:0.0014265942648792984,((n262:0.001961490872785541,(n338:0.00000100000050002909,n133:0.00000100000050002909):0.0005296213237384135):0.000654747970470067,n125:0.0016350225728190804):0.003257365465556004):0.00000100000050002909):0.001358204227184211,(n39:0.004927385118505204,((n380:0.0017202006987147665,n218:0.00000100000050002909):0.007473728276992848,((n43:0.005587754626544291,(n229:0.0021421213510416266,(n136:0.0022453798327418777,(n214:0.0008271815255980842,n175:0.008133742081200549):0.0007779648796135101):0.0015945841002588622):0.0010674651138445528):0.0026807660460593237,((n71:0.006610094633667471,n142:0.002722137425393866):0.0010128292368467733,(n5:0.014677062053526696,(n144:0.0011941867954746057,n396:0.0009515654909683709):0.005561095872570296):0.00000100000050002909):0.0005916413809442458):0.00000100000050002909):0.00000100000050002909):0.00000100000050002909):0.0013545198528617064):0.00000100000050002909,(n291:0.01566551587986844,(n226:0.00692460702193819,n372:0.017676235674794462):0.0010043189468511762):0.00000100000050002909):0.0004062105071285823):0.00000100000050002909,(n48:0.0010917467307847604,n202:0.0016365587659083383):0.0013462061321093672):0.00000100000050002909,n355:0.0037351775571016553):0.002190066238666806):0.0010383817794139963):0.00000100000050002909,((((n299:0.007370386635566074,(((n378:0.00000100000050002909,n91:0.00000100000050002909):0.004329110490483345,n343:0.004696614666515206):0.0035137000827880987,(n90:0.0034488401174634508,(n181:0.0005717176645493771,(n107:0.0013446602798118984,n386:0.00000100000050002909):0.0011572727346988328):0.002683558517183974):0.002380766291481562):0.0010998072789385077):0.00000100000050002909,((n121:0.001063115674149205,(((((n92:0.0034343005092428757,n275:0.007251218988665731):0.0009968604820266211,((n428:0.0026042086339455404,n179:0.004982048315896721):0.007872283779159018,n296:0.005735994119713297):0.0011413493341464684):0.00000100000050002909,(((n235:0.0011527404241205182,n347:0.00000100000050002909):0.00000100000050002909,((n322:0.0006338859217726588,n216:0.0005465483114146693):0.0018647052816292975,n81:0.005069239531375869):0.0024551115840373305):0.00000100000050002909,n208:0.0075734413708646526):0.0008570470759062751):0.00000100000050002909,n271:0.004818815939467731):0.003388894001438587,(n401:0.0015944898066930764,n339:0.009887272571829963):0.0015965969217086443):0.00000100000050002909):0.0011250008648282823,((n178:0.002770625940912088,n308:0.0030894719364879856):0.005513591930327859,(((((n58:0.006900581713646427,n473:0.00000100000050002909):0.00144946145230491,((n327:0.0026976753571288812,n374:0.011388880116685885):0.0016578021795708884,n72:0.005653958212181906):0.00000100000050002909):0.0008515391261517342,n106:0.0059876989120405295):0.00000100000050002909,n57:0.0021403974402508905):0.00000100000050002909,((n295:0.0028173118068062775,n300:0.0010664889822669765):0.0016206629181097277,n329:0.0032386888410799427):0.00533292714936982):0.00000100000050002909):0.00000100000050002909):0.0007260424722945549):0.00027359385277954255,((n330:0.010533018998198734,(n413:0.0032824668288460508,(n101:0.0058378745874994925,n38:0.001619715427813724):0.0002533540320102388):0.002160526411447055):0.00025203575888263827,(((n151:0.006617336823237409,n373:0.002711957821725509):0.0023037650023693475,n389:0.00448535934969642):0.0007194504966427079,(((n222:0.018582549394671008,(n139:0.0031825502120154847,(n278:0.0010788337925850134,n84:0.00000100000050002909):0.0011198544054380108):0.00028438672038276795):0.0011672724087194164,n195:0.004561292095824885):0.002184988595103222,(n59:0.0010193521632419077,n461:0.0038025399993757677):0.004847398870857402):0.0009280656256701277):0.00024085093099378302):0.00000100000050002909):0.0003921227745940447,(((((n353:0.007313721942296164,n421:0.003681468534471264):0.0010860797649747374,(n429:0.0008173080537800351,n242:0.00000200000100005818):0.006968405475081097):0.0005190595730798877,(n328:0.00847671760905182,(n240:0.005580357281857848,(n162:0.01302615360445133,(n335:0.0045855405003213424,n55:0.00813880384758062):0.002265704361204976):0.0013453076070260644):0.00000100000050002909):0.00000100000050002909):0.0004981995158659033,n207:0.007166725065337798):0.00000100000050002909,((n318:0.017174315465771226,n462:0.0063364751295865995):0.0002862406916881707,(((n1:0.01020419384015675,(((n260:0.0021280477116855695,(n266:0.00000100000050002909,n265:0.00000100000050002909):0.00047848730009350705):0.0011579325914157093,(n154:0.002243321105127358,n316:0.0021906345834087826):0.0018334743467100635):0.0005119911666970041,n201:0.002150489353342689):0.002993652572968924):0.0010551277854376501,(n281:0.01017448027350239,((n379:0.0005546049876313794,n27:0.00000100000050002909):0.0005295151811808711,((n25:0.00000100000050002909,n368:0.001070784059520667):0.0010610891494596403,n423:0.0010774776368614341):0.00000100000050002909):0.005990775396486722):0.0014941997786557277):0.00000100000050002909,((n230:0.0043773327128258325,((n241:0.002122523726905896,((n161:0.013793986820993063,n243:0.00000100000050002909):0.004408635934907051,n261:0.0018451620070357026):0.00000100000050002909):0.0010922636334590133,(n309:0.008181865627066241,n384:0.0022528645787991022):0.00000100000050002909):0.00000100000050002909):0.0004479136156720012,(n45:0.0177142044430649,((((n122:0.0035272343908285867,((n310:0.0012658977147693474,n323:0.0014629976680571172):0.0005323293813118706,(n391:0.00642706783613765,n171:0.0013186784595991265):0.0014608273107145754):0.0024627445040597195):0.00000100000050002909,(n304:0.00277007184930777,(n348:0.002025041200283495,n439:0.007170904654168181):0.00000100000050002909):0.0010641273657024434):0.00000100000050002909,((n387:0.003195822186669973,(n246:0.003152252608056662,n66:0.0009803010515559655):0.003065417541500308):0.00000100000050002909,((n2:0.0016121448233895382,n3:0.006049347372338176):0.0032160565840746616,n417:0.00647050543154247):0.00000100000050002909):0.0015941477882902772):0.0011691875931282125,(((n447:0.0032249325600882204,n252:0.004813499022054785):0.00000100000050002909,n324:0.00428619392528922):0.00000100000050002909,(n344:0.004289442030706274,n276:0.0017828825959868323):0.002144032017013288):0.0007109436349667031):0.00000100000050002909):0.0005492502148920573):0.0006535742486452644):0.0011249034449006263):0.00000100000050002909):0.00000100000050002909):0.0002151501567480096):0.001116525515339752):0.00000100000050002909):0.0001958134484653466):0.00000100000050002909,(n283:0.004145181762114298,(n169:0.003868939661592851,n172:0.004193624154917909):0.006621410542746663):0.00040908162944626605):0.00036225947082350516):0.00000100000050002909,(((n422:0.0011810048700294459,n397:0.00000200000100005818):0.0038725208933902593,((n17:0.005585363319610585,(n292:0.010839196064962314,(n453:0.004700150109055932,((n331:0.00000100000050002909,n31:0.0005568854749099549):0.0026832138167126704,(n51:0.005397908072729991,n277:0.0010806728902400375):0.0005249833303665913):0.0005476514405091262):0.00000100000050002909):0.00047890744666214763):0.0023828711021377383,((n105:0.008398395799429697,(n432:0.0034024629231684425,n67:0.00000100000050002909):0.0019033433779421392):0.00352873847614077,((n402:0.0011883298515441417,n77:0.002064378051065207):0.003981642608315352,((n400:0.00953907402760195,n213:0.006586410692664135):0.00000100000050002909,(n420:0.0017084405197876308,n319:0.0022100050911212895):0.002771712180298965):0.0007194858234174414):0.0016731165977681226):0.0005493492751279619):0.0008087477827478821):0.00031100415290487884,(n152:0.009841501614476758,(n288:0.0024630253214015714,(n315:0.003680110882174661,n80:0.00472297858662818):0.004626890757855133):0.0029151787251224777):0.000591921529834559):0.00003756554941318438):0.0009460337897234502):0.0001589429382011214):0.0038906027121708786):0.0015857534946311102,((n257:0.013092884190186897,n87:0.012961925957960543):0.006324960351392647,n454:0.014793086873013473):0.0010836531895290437):0.0023837688416169594,n393:0.0143635641809014):0.00040890723849353327):0.0345519093758951,n65:0.07950749055925119):0.009644145583480528,n114:0.05128711003841478):0.051997443646586684;
	TREE 'Imported tree 2++' = ((((n406:0.017802547641464984,(((n279:0.01981647481647681,((n264:0.005009773247313215,n463:0.005459695630190119):0.005877888490821992,n385:0.012119375395029285):0.005059446545815292):0.0012668412167271316,((n74:0.010688483777571459,n143:0.015746063187541695):0.001854377476709733,n430:0.015471575203875826):0.0017041074064027934):0.0008551606981565397,(n86:0.019660786678166158,(n431:0.012648735141830892,n253:0.010849075038846651):0.004746528341091307):0.0029739599841617287):0.0009996972856204506):0.002013799169786654,(((n33:0.0194276037779762,((n21:0.004977917951831309,n448:0.0049673550447682634):0.0004489077804375459,((((n268:0.0035989385926492685,((n165:0.0015752655733693383,n49:0.0024078439880836806):0.00246841107332208,((n219:0.002130033484867757,((n362:0.005383079452223881,((n407:0.0036703593853983827,n22:0.005206357615140469):0.00042307469942444144,(n104:0.0035961465951890696,(n408:0.00000100000050002909,n410:0.0016375051755394543):0.002021022847627275):0.0008640682951970894):0.0008427495904646096):0.00000100000050002909,((((n180:0.002433996384981935,n191:0.0034314450144707813):0.00035045493241850584,n370:0.0009360343432806557):0.001570291680580329,(n325:0.005692058616119555,(n282:0.0024767192813325367,n40:0.00000100000050002909):0.0009257728857682147):0.0002722559098026418):0.00000100000050002909,(n312:0.0011567502304965249,(n409:0.00000100000050002909,n53:0.003094921391014435):0.003120528513817503):0.0008726973056358826):0.0004897817954204513):0.00032348414340324996):0.0006523974363535647,(n256:0.005088677582158003,n205:0.00000100000050002909):0.0008818555218593704):0.00024413868262431848):0.0006866066779119042):0.0029486979648653297,(n227:0.005824535898572087,((n395:0.00522395468802382,(n196:0.005469031495284456,(n42:0.0016823961272830882,n437:0.006974012814452064):0.0011384928149145033):0.001765241230337482):0.0005406276506468421,n272:0.006072733508050558):0.002854751443950367):0.00038008215836354923):0.00045516706911314227,(n62:0.004370250249776671,(n478:0.008692434487641818,((n198:0.004066951193070696,n132:0.006691679791316597):0.0015374583684330649,(((((((n435:0.001596833062508955,n131:0.00000100000050002909):0.0022898907065336347,(((n371:0.000962064881738673,n30:0.007122748923354439):0.0007888216572577169,n375:0.0023649006543627962):0.0055484257969998976,(n365:0.00000100000050002909,n164:0.000985494380098214):0.000324530371070424):0.0011485576373645766):0.00000100000050002909,n11:0.008928339582414051):0.00000100000050002909,(n419:0.005693411251850396,n352:0.0019153721959263227):0.0005004040270350272):0.00000100000050002909,((n28:0.006540507892239002,(n97:0.005662338058999796,n452:0.0054372868656778605):0.00000100000050002909):0.0006168511212822415,(n293:0.005251212086404888,(n126:0.002687969735431898,n173:0.00195378055852921):0.001564305773032037):0.0005646469449511983):0.0004619914799904785):0.0006703772568593163,((n149:0.004628743273326338,n12:0.003371263223806867):0.0002897199843401459,((n479:0.0061282444364082565,n426:0.008247872494901725):0.0011315231307712009,((n156:0.0056527248216927855,n394:0.0004823427861607213):0.006325334635165453,(n221:0.0005406750091441783,(n234:0.00000100000050002909,n342:0.00000100000050002909):0.0017430865519146106):0.004085637721661465):0.0009584869226864216):0.0009510549806341796):0.00000100000050002909):0.0013604726864882065,(n427:0.0036315209740594525,n203:0.0066494377075703):0.0037473035956547235):0.0004480786415577055):0.00000100000050002909):0.0006110370642883155):0.002063213944865773):0.0012765692843258187,(((((n433:0.004905329917449743,n376:0.0071531568463262815):0.0007732098568937197,(n303:0.007967851351915346,n458:0.005047704499662182):0.001018922422784102):0.0036146074784954574,(((n16:0.009423864107722824,n147:0.004032810278774931):0.00000100000050002909,n61:0.0067427771359392565):0.0010153605008315207,(n341:0.012253736722559276,(n249:0.004141101991988144,((((n333:0.00000100000050002909,(n294:0.00000100000050002909,n404:0.0028197119328007853):0.0035111322032428797):0.00000100000050002909,((((((n350:0.00000100000050002909,n470:0.00000100000050002909):0.0015663650758771666,n457:0.0018638665434873706):0.00000200000100005818,(n124:0.0005573000895951075,n123:0.0021012706789384277):0.0010426841709996323):0.001941348629391873,n13:0.001575197203073687):0.00000100000050002909,n363:0.0027323282485713653):0.00000100000050002909,(n47:0.00000100000050002909,n24:0.002677173290005528):0.002285835672548329):0.00091979973033923):0.00022194110216621583,(n232:0.004274853800322845,((n412:0.0037118621138468116,(n482:0.0015797313237798528,n176:0.0012183948455480116):0.00000100000050002909):0.0012199265315157148,n148:0.0015805328896726092):0.000614396385217273):0.0008267779228046653):0.0005923722633836109,(n474:0.004550801644058828,n4:0.007181508687356251):0.0018003567979800051):0.0003928419739362218):0.00000100000050002909):0.0001924843138836836):0.00000100000050002909):0.00000100000050002909,((n233:0.007825931565589356,(n68:0.002632134783738253,(n354:0.007820456362803126,(((n477:0.00000100000050002909,n118:0.0010723968844372797):0.00000100000050002909,n116:0.0005235220899016129):0.00037117800048383926,n465:0.001955407462076947):0.0010817231468399423):0.002853501763729263):0.002159743069865507):0.00000100000050002909,n466:0.0017612005484264747):0.00024882857173326965):0.0009035669548704788,(((n456:0.0032052905086175504,n411:0.0036649035407298382):0.0015413070768050057,(n290:0.0026402010086192915,n215:0.0042840194510732526):0.0012556450178635825):0.00040974631020877854,(((((((n251:0.006495087296150584,n95:0.005628656147054456):0.0014193900155595243,((n183:0.00000100000050002909,((n99:0.00000100000050002909,n200:0.0011444726934932232):0.0005189763420010964,(n442:0.0036695644329568042,(n98:0.009046438825743812,(n285:0.004406620281158224,n245:0.0003973068521337442):0.00000100000050002909):0.005915035021891169):0.0003724719620986363):0.0003807281914423835):0.0015583063361343256,((n270:0.00000100000050002909,n274:0.0016948949824589564):0.0014692237124326194,n297:0.005323947878418753):0.0007225373441024591):0.001658915273884996):0.0006546174644469025,((((((n259:0.0075827140546958615,(((((n344:0.0015784222072291526,n276:0.00250692781981218):0.0030182976732301917,((n162:0.013917965995427412,n372:0.01571842859576651):0.0019658049196425746,(n462:0.0039451241341429185,(((n241:0.0015587436889152725,((n161:0.0194238337195346,n243:0.0018822582557023583):0.003014547645565414,n261:0.000603225040430194):0.00000100000050002909):0.0005475173587826153,(n309:0.005291088107508646,n384:0.005479214627474552):0.00000100000050002909):0.00000100000050002909,n230:0.004147696886774931):0.00000100000050002909):0.00040263611014279235):0.00000100000050002909):0.00033426546782633067,((((((n122:0.0014939907830806962,((n391:0.0072508976273378154,(n310:0.00000100000050002909,n171:0.005848000776873462):0.0007701420611346209):0.0009825561204837,((n447:0.004292873021984347,n252:0.001570571303950466):0.0010450261736633893,n324:0.00316325802825269):0.0009153180541772299):0.00026939355807031407):0.00000100000050002909,n45:0.011040814746070198):0.00000100000050002909,(n2:0.0021196462542100365,((((n260:0.004206959071243558,(n154:0.005418736268124323,n316:0.00000100000050002909):0.0014383274200084372):0.00000100000050002909,n201:0.004039906273880196):0.0004722467733199117,(n266:0.00000100000050002909,n265:0.0004345506253658825):0.00000100000050002909):0.004489713114515864,(n246:0.002777168647545337,n66:0.0011628984942530665):0.00000100000050002909):0.0024837343404060528):0.0004840408692296165):0.00000100000050002909,(n348:0.006580548375270394,((n304:0.0005123643332845011,n439:0.002711596008271296):0.003173550885756733,n387:0.005236772176135254):0.00000100000050002909):0.003148201545395345):0.00000100000050002909,n417:0.003682320815194156):0.00000100000050002909,(n3:0.0065279231519938,n323:0.004187484156607804):0.0009944033028997106):0.0013618657962949994):0.00000100000050002909,n353:0.007556107647133052):0.00000100000050002909,((n423:0.0021423654433058736,(n379:0.0010973015206712422,(n27:0.00000100000050002909,(n25:0.0010574712254076816,n368:0.0010617414884601924):0.0005237584622444174):0.0005226998309859537):0.0005232205054528477):0.0032684392745854457,n281:0.009914184418769345):0.0003342052180708076):0.0015801432129410008):0.00000100000050002909,(((n403:0.0015674028029530294,n320:0.002157113713620336):0.0024743029300277218,(n166:0.012066207316755544,(n480:0.004314303174687485,n287:0.009639566551657095):0.0034286573906016833):0.0006968636739578087):0.0003849482782966159,(((n244:0.0025686746966770493,n269:0.006038075439268895):0.004255558086829696,((((n169:0.004559260399248582,n172:0.002054345254152067):0.005301378183471094,n346:0.006819408623830176):0.00000100000050002909,n318:0.011923181432290292):0.002949784346678129,(n314:0.0006079562056708841,(n35:0.0005072537822601538,n18:0.0010403014698402934):0.004283284153202848):0.001789744707173721):0.00040908009418248465):0.00000586705994991229,n240:0.004944576984496234):0.000003284218980126):0.00000100000050002909):0.00000100000050002909,((n146:0.0009307101017175467,n82:0.0057499871668381984):0.008454840610959198,n8:0.0044308928115901385):0.0002858953305113966):0.00000100000050002909,(n239:0.0023751856755805626,n459:0.0024396877445515192):0.001148203911176509):0.000322724862327966,((n222:0.01739029667835155,(n481:0.006317203117392469,(n455:0.011085861999707639,(n23:0.009223496267016696,n117:0.003933496372945831):0.005064235684590051):0.005294434039907046):0.0006000134858224999):0.001094670082220278,(((n446:0.004205784475606789,(n102:0.0006312419352433183,n109:0.0026278500581649756):0.00000100000050002909):0.005984794127046803,(((((n41:0.0031198701592250046,(n390:0.003739594882529224,n263:0.0006240798394815435):0.003117551122971239):0.0030495815953838277,((n356:0.002197104872400175,(n158:0.002085971268483241,n321:0.000517396988587822):0.0028868908399768715):0.0039030808715237873,(n150:0.002118884815596302,n63:0.00000100000050002909):0.004197358720233551):0.00095547954836386):0.0018347675488754485,((n5:0.011322325013845808,(n226:0.003812671828689091,n291:0.007419265246225746):0.002401594511184614):0.00000100000050002909,((((n43:0.004382266674584646,(n229:0.002085818641915498,((n214:0.002633222266818193,n175:0.0034032067570036045):0.00000100000050002909,n136:0.00000100000050002909):0.0028368378900483263):0.00000100000050002909):0.003140514866222459,((n7:0.0013868724832241447,((n170:0.0031824366962392193,n217:0.00000100000050002909):0.0015681994145358717,n361:0.0016048898250628735):0.0015689820166121657):0.00043412449813248907,(((n262:0.002701538234893773,(n338:0.00000100000050002909,n133:0.0005335839745830184):0.0005239109467190846):0.0010743413669279062,n125:0.0021580856711463253):0.001617256768178447,(n71:0.003194559857048391,n142:0.0010451731930599967):0.00000100000050002909):0.0010715347736549657):0.00000100000050002909):0.00000100000050002909,((n144:0.002703485549309522,n396:0.00000100000050002909):0.0037804453835894574,(n380:0.0010589466376112462,n218:0.00000100000050002909):0.0037123667934614315):0.0005166934150398299):0.00000100000050002909,n39:0.005361362203078581):0.0014685201432657023):0.00000100000050002909):0.0008284804276667339,(n469:0.012426082228152504,n355:0.004090069512580177):0.0011661415560419003):0.00000100000050002909,(n48:0.0005697318363955373,n202:0.0020271545883294266):0.005295026962622488):0.0004267362622628144):0.00150488855501718,(((n366:0.004754326544610116,(n88:0.010518037070877157,(n451:0.010360695516099307,((n9:0.00912803986501732,n52:0.003857758867340171):0.0017074994898720825,((((n199:0.001784437656217342,n187:0.001113210261785878):0.0021398488325403745,(n138:0.0021761662725858374,n358:0.003012259861061179):0.0006840530128236083):0.0010030166793552862,(n69:0.002232357715589895,n75:0.00000100000050002909):0.003315607082358712):0.00030280615943057077,n155:0.005253563440319421):0.00000100000050002909):0.0009476277590779462):0.002596187342505861):0.001132777860161043):0.0018783681124884483,(((((n349:0.005764092201182973,(n467:0.002174237647740239,n383:0.0010449018174221575):0.0015705447127369225):0.00000100000050002909,((n110:0.000527808116623179,n186:0.002360270502021974):0.00000300000150008727,n236:0.005543409995643314):0.0015920639562917584):0.00000100000050002909,(n44:0.009643173233573518,n83:0.0062660227058685064):0.004116398699864026):0.005307608956122485,(((n204:0.00000100000050002909,n206:0.0010886624858933917):0.003248371616762075,n127:0.014945598919190249):0.001977652801018192,((((n153:0.005644461248726037,(n476:0.00000100000050002909,(n284:0.0032236932283060634,((n46:0.0005277725602088671,n112:0.00000100000050002909):0.0005282707465464856,(n212:0.00000100000050002909,(n115:0.00000100000050002909,(n119:0.00000200000100005818,n228:0.006918118218778721):0.0005945070769483033):0.00000100000050002909):0.00000100000050002909):0.0011665470336658375):0.000871559857869367):0.00000100000050002909):0.00000100000050002909,((n34:0.00000100000050002909,n398:0.00000100000050002909):0.00000100000050002909,n424:0.00000100000050002909):0.002725062637645952):0.00000100000050002909,((n464:0.0017564049861496485,n317:0.0017576062796635951):0.0002931273397623555,((n280:0.001658374957851623,((n231:0.00000100000050002909,n70:0.00000100000050002909):0.00000100000050002909,n135:0.00000100000050002909):0.009855993908724128):0.0008940778550208661,(((n128:0.0040993218116897115,(n445:0.0016221081131973028,n443:0.0027477364469071066):0.00000100000050002909):0.003979519677966431,n134:0.002179996278029882):0.0024730731801175343,(n182:0.002741762538841573,(n111:0.0003561806139533224,n359:0.00000100000050002909):0.00000100000050002909):0.005516548251355422):0.0011469568016695257):0.00037851649914523076):0.0002729649382003068):0.000550869828761713,n168:0.009946434817814896):0.0001859857715778956):0.001313971249379062):0.00000100000050002909,((n336:0.005032988920490285,n313:0.0018252537209380315):0.0029853536388559465,(((n190:0.0005352282510326905,(n96:0.00000100000050002909,n108:0.001923185828101351):0.004555834422930104):0.0011320895153687281,((((n307:0.0012036672910345058,(((n247:0.0010885273634798837,((n444:0.000547371319433865,n326:0.001601411552015335):0.00000100000050002909,n351:0.003976427798198367):0.00000100000050002909):0.0014756271912890803,n194:0.0016524481174725319):0.00036375177675993604,(n415:0.00000100000050002909,n85:0.0014648529254195368):0.0014630471112084458):0.00000100000050002909):0.00000100000050002909,(n382:0.0021475788292452474,(n163:0.0010560232448262948,(n113:0.0005291674341757734,n192:0.00000100000050002909):0.001063988794553228):0.0015934045048849783):0.0005279627749209565):0.00009487007721320822,n94:0.0005302178474681532):0.00019573350293905866,((n471:0.002157214149143466,n19:0.0026797854086485933):0.00000100000050002909,n301:0.003196537474107064):0.00000100000050002909):0.00000100000050002909):0.0006414906064652458,n254:0.0015934826039530187):0.0006463986166664943):0.0016148904709401626):0.0006505411420576879):0.00000100000050002909,((((n188:0.0011247392771856375,(n177:0.01567427770977904,n54:0.002600177760101456):0.00000100000050002909):0.0007523983740671751,n37:0.006853762082682695):0.00040898079388192296,(n399:0.0012435258917046065,n120:0.0022941000106057744):0.006580313225448015):0.003098982283968482,((n334:0.0005903794020410761,n460:0.00000200000100005818):0.004796608917873079,n305:0.014629520003546701):0.00017848506078785553):0.0015375809262506192):0.0009146802905563324):0.0005395424574774453):0.00000100000050002909):0.00000100000050002909,((((n184:0.006385772092049619,(n20:0.001810550767455785,n76:0.0016385120303482206):0.004228038693537818):0.015474763770156288,n302:0.004005564687584258):0.0030850484313858476,((((((n273:0.015114949768224176,((n364:0.002537927799546545,(n145:0.0021486624757093534,n388:0.003120710007754181):0.007760791990411329):0.0021685110010214777,((n14:0.00000100000050002909,n434:0.00000100000050002909):0.001031079554056865,n340:0.00000200000100005818):0.009879721025651022):0.002149646100499709):0.00000100000050002909,(n141:0.011224855889543285,n441:0.003170296533540738):0.000992987624124021):0.00000100000050002909,((n438:0.003943758990521347,n224:0.005418276676280734):0.0044546450588655185,(((n306:0.0026726714140772666,(n405:0.0005475646898384604,n258:0.00000100000050002909):0.0010532973297728318):0.00000100000050002909,n425:0.003968318245328947):0.001394917566835466,(((n440:0.0028943937386315135,n78:0.002727787389117224):0.0005866924874951548,(n32:0.001071186757170473,n211:0.0015561035160259877):0.0009811930415208599):0.00000100000050002909,(n210:0.006738361155751694,(n377:0.0069103269991570996,n468:0.00275195947747556):0.003187973741564626):0.000679288003679164):0.0011942951642139696):0.000835509628530587):0.0008472388131554195):0.0007243694713912727,n160:0.011490251515457402):0.00000100000050002909,(((n345:0.021686323568541273,(n189:0.007722445930923886,n450:0.011528761634793596):0.0016897171443617616):0.0017128024900578385,n237:0.006380814632766523):0.001043340313402086,((n50:0.00756162935171233,n89:0.007022781704889146):0.0025369529633346146,(n238:0.0015723429021767654,n255:0.00000100000050002909):0.0026118976527457834):0.00000100000050002909):0.0010247142491382189):0.00000100000050002909,(n209:0.01714852865055689,(n73:0.004649878336144433,(n79:0.0067454466774061785,(n26:0.010516267922986476,n381:0.01120083604160735):0.0007110646981933972):0.00037550751417568296):0.0007168770922190311):0.00037862176258912205):0.0007404739388227068):0.0020103743433537258,((((n311:0.0112503243381351,(n436:0.002420431711127824,(((n130:0.0060393233168789025,n332:0.0038231224321347316):0.0033242188802563395,((n0:0.001636550171786726,n289:0.002842703114976701):0.00000100000050002909,n360:0.0016474548183663012):0.0003236044905587506):0.0005690503453659295,((n475:0.0023531545188253886,((n337:0.00000300000150008727,n197:0.003113877266598242):0.00000100000050002909,(n472:0.00025817130677437746,(n286:0.0021599527279554803,n157:0.0011215877157513285):0.0015797010715906442):0.00025427230296827524):0.0007633226502658744):0.0007671119759107288,(n367:0.00000100000050002909,n36:0.0016247464573383114):0.0005793778577219243):0.0013007181545492774):0.0009238641453541884):0.0007773256314638845):0.0015664289632057688,(n10:0.007560786294426084,((n174:0.004347038595737756,(n416:0.0021334760273315208,n56:0.0037342209633007433):0.0026514832879140056):0.00000200000100005818,(((n64:0.018774419787175776,(n250:0.0014018867005345108,n140:0.00000100000050002909):0.000940499926163778):0.00000100000050002909,n100:0.00040131387996215966):0.000719804640728833,n357:0.009484496800081557):0.0018621556270672819):0.0006242026182305606):0.0009145417974358763):0.002015758063860149,((n152:0.005836278276037433,n298:0.005307262735062433):0.00000100000050002909,((n369:0.0007675794462176534,(n414:0.003814341513616007,(n267:0.0021345023127962936,n185:0.00000100000050002909):0.00000100000050002909):0.0015370398346496493):0.004966582172643583,(n220:0.001308872616472198,(n392:0.0038175867864109663,n15:0.003516419553051164):0.0015411928549105651):0.0020124333293595393):0.0004673470414683179):0.0009579374325915452):0.0007837880234737518,((n93:0.0015823166372946806,n418:0.0018315690049586803):0.006634922805953997,(n103:0.00000100000050002909,n137:0.0029676818367897493):0.005182372978991867):0.003243548141405053):0.0001935383359269396):0.0001496598016660073):0.000425246776024976):0.00000100000050002909,((n248:0.0005199497297269627,n129:0.0031220543038267337):0.0038380393925344356,n283:0.004170023504854312):0.000586714692517339):0.00000100000050002909,(((n421:0.003748825378898647,(n335:0.005793704230956785,n55:0.0075337062968564815):0.0016862910849907975):0.0002606610830930554,(((n429:0.0008706113524236453,n242:0.00000200000100005818):0.004412167410799006,(n225:0.003469556775161897,n60:0.0008326707895750546):0.007579117315354749):0.00020995481390238138,n328:0.005629542481232189):0.00041156417248315114):0.00020570048546534063,n207:0.007799131796047328):0.0004146679052352576):0.0003953622969964027,(((n422:0.0014552616639592019,n397:0.00000200000100005818):0.0014537733741013853,(n288:0.003027324163996633,(n315:0.006467130288437415,n80:0.0084260242219247):0.004713539824444796):0.0020677749534941505):0.00000100000050002909,((((n453:0.005698060431734639,(n331:0.0014846310211687973,n31:0.0010856937763564604):0.0022252145765373683):0.00000100000050002909,((n17:0.004535975689974642,n51:0.0037328011530788573):0.00000100000050002909,n277:0.001060161335504666):0.002294609456217311):0.00000100000050002909,n292:0.006084301757430805):0.0022980070386866614,((n105:0.004312324999303211,(n432:0.0005492203587205149,n67:0.00000100000050002909):0.0017005171274881595):0.0030364058251295197,((n400:0.014152410133793128,n213:0.005615884556124377):0.00000100000050002909,((n420:0.003141309545981834,n319:0.0018731508370321576):0.002641939361959907,(n402:0.0015884540815177103,n77:0.0012027362135141968):0.0039842774166724175):0.0011560380457248916):0.002625298633761693):0.0005929893089239638):0.0015790250505572565):0.00000100000050002909):0.0005401148118265548,((n449:0.006112766300188287,((((n373:0.004665415533645787,(((n278:0.0005279317981276166,n84:0.00000100000050002909):0.0027730074557133257,n195:0.004992075990276478):0.0020945537532347973,n139:0.0035112287626901818):0.002384612539634698):0.0007156642014600832,(n389:0.004148212307432286,n151:0.0063064348680153415):0.0023005988141355112):0.00005247058022323463,n330:0.012735822914933853):0.00042349701910752963,(((((n58:0.006212607875855967,n473:0.0017874391457908222):0.0014049359270382803,(n327:0.009164315441814553,n72:0.0026400854794655115):0.00000100000050002909):0.000875175916873074,n106:0.004843600134452172):0.00000100000050002909,((n295:0.001657122805506196,n300:0.0005309888219714462):0.0005277779052628764,n329:0.0021274640966239):0.004213581590470751):0.0017531201283254307,(((n59:0.0003359609872327555,n461:0.0027680263522231597):0.005339115888844681,(n299:0.006257586907034789,((((n378:0.0018990591961216875,n91:0.00000100000050002909):0.007424200017082902,n343:0.006316071728296154):0.002423368314696314,(n90:0.002073209297482023,(n181:0.0005709367517125377,(n107:0.00000100000050002909,n386:0.00000100000050002909):0.0018338827985274102):0.00000100000050002909):0.0029399493875598036):0.001550315503752318,((((n339:0.013137312335392844,n121:0.0005263096345155392):0.0005022647981149424,n57:0.002982990431511743):0.0021175451221725765,(n1:0.004259380868450454,n401:0.0032058315670856763):0.0010204603738241571):0.00000100000050002909,(((((n208:0.006739011320516431,(n235:0.0007336177724014722,n347:0.0018178974728293616):0.00000100000050002909):0.0003578486634390965,n275:0.006431039797548893):0.00039301596595920886,(((n322:0.0005636196755612055,n216:0.0005431889747228475):0.001655508438747435,n81:0.0022317455478193613):0.003291274543836618,(n92:0.005044443875636068,n271:0.003696386448952298):0.00045074250509528885):0.00000100000050002909):0.000973747690322398,n296:0.005641463418342256):0.0014045831069169558,n374:0.008414691358004909):0.00000100000050002909):0.0018979063718634523):0.00001278752118634329):0.0005259846032550362):0.00000100000050002909,(n178:0.007111380979473758,n308:0.0037094995652074453):0.004261151956194956):0.00000100000050002909):0.0014374351186678602):0.00000100000050002909):0.00000100000050002909,(((n193:0.00000100000050002909,((n167:0.00000100000050002909,n29:0.00000100000050002909):0.004408107395796907,n6:0.00000100000050002909):0.00000200000100005818):0.0075602934349451485,(n159:0.013582620378373706,n223:0.009767348043336252):0.001045912034629067):0.000425559331414844,((n428:0.0019104887622745505,n179:0.0011931391404572012):0.009747033316208893,((n38:0.00221685828032369,n101:0.0025907365638750506):0.00000100000050002909,n413:0.00212044394601988):0.0010907824697933854):0.0018060162662120636):0.0008409772722430555):0.00019729912950713864):0.00000100000050002909):0.00000100000050002909):0.0017611575619135317):0.00017397445286736652):0.0026080402692815023):0.002768377374109115,((n257:0.012698020068493588,n87:0.011311389766180286):0.006736318388676015,n454:0.013329175509936834):0.00021446168405507378):0.002547360998492406,n393:0.013992162611585833):0.00000100000050002909):0.04436654462688553,n65:0.08857260458229844):0.007959502936696535,n114:0.05985808161495269):0.053809507079629025;
	TREE 'Imported tree 3++' = ((((((n74:0.01257490711379607,n143:0.014617002221869147):0.0019413329920704582,n406:0.0191139091042099):0.0008549835310109654,((n86:0.02216536396762214,(n431:0.010564309897893557,n253:0.010539003154217456):0.0025022721453081954):0.003986341125033263,(n430:0.020049912175571394,(n279:0.012898119051425606,((n264:0.005815009638227852,n463:0.005107141715784904):0.004729730414250006,n385:0.010761137024772244):0.004284006813081868):0.000566704596977854):0.0010386398169222428):0.0012742190544570947):0.0024613452171868533,(((n33:0.014168065036426552,(n21:0.003692270685135008,(((n227:0.004538149244157498,(((n395:0.004923974133531073,(n196:0.007731723832874406,(n42:0.0007328801130699129,n437:0.004046586050189278):0.0017281155019303837):0.0014335872531604367):0.0020631545505511847,n272:0.008340355998671417):0.0019549217629888475,(((((n256:0.007295239502138633,((n407:0.005150856811703116,n22:0.00655121895176251):0.0008663371705294592,n205:0.001867466601215777):0.00000100000050002909):0.00000100000050002909,(((n312:0.0015127212880774207,((n219:0.007367059945240961,n409:0.0025176694646734813):0.00000100000050002909,n53:0.002636474220878571):0.00000100000050002909):0.0026779374777862928,(n325:0.005268615533520111,(n282:0.0013995278594386394,n40:0.003443037262818257):0.0003426043929794334):0.001218514815264925):0.00000100000050002909,(((n180:0.002597664436324141,n191:0.006171396286666633):0.00000100000050002909,n370:0.0019463281468649052):0.000884821181170617,n104:0.004092259346338042):0.0007368228355747393):0.00023467097288603587):0.0007137375401136129,((n408:0.00000100000050002909,n410:0.00000100000050002909):0.003005629955948139,n362:0.00816816885753392):0.00000100000050002909):0.00047392330066457864,n268:0.0037063678224180364):0.00000100000050002909,(n165:0.0020058260972023153,n49:0.0014588665825246787):0.001843756312628247):0.0022064284836364576):0.00047155025242390225):0.0006602523005757363,(n62:0.005277008219814712,(n478:0.007724678396920752,((((n352:0.002987638308679346,n11:0.005633829424438343):0.00028399760503789134,(((n419:0.0025411802779425428,(((n28:0.010980017584637439,(n97:0.0015118056301349173,n452:0.002721684393799186):0.00000100000050002909):0.0017491801272807648,(n293:0.0023751565706582422,(n126:0.003238235616646868,n173:0.0018728704892833682):0.0011252462979180577):0.0005451504258558952):0.00000100000050002909,(n30:0.007589591415889823,(n375:0.001658406887742034,n371:0.0013641576305783712):0.0015067168680360167):0.002681462806891363):0.00000100000050002909):0.00000100000050002909,(n435:0.0022361674789830744,n131:0.001406343075929236):0.0006949865965343766):0.00025400772191078684,(n365:0.00000100000050002909,n164:0.0014313051826808972):0.0017802457808392138):0.00000100000050002909):0.0013624776976479507,n149:0.006416436206353638):0.00000100000050002909,((((n427:0.0026477281885408693,n203:0.004861338099766984):0.008322572112175611,(n198:0.0036571484212233624,n132:0.008917970977269334):0.000424896545847991):0.0005128740011923455,n12:0.005237916539905277):0.00000100000050002909,((n479:0.006421728926914864,n426:0.006093161335406908):0.0011347220090333963,((n394:0.0005863503715678001,n156:0.003491996916860382):0.005189864553536319,(n221:0.0005727413200254808,(n234:0.00000100000050002909,n342:0.00000100000050002909):0.00000100000050002909):0.005030724454432738):0.0028581745466958815):0.0012230160254659685):0.0006370427200251321):0.00059493527297434):0.00036375653923434675):0.001590915541388249):0.0005201427440793609,((((((n422:0.0021459558925202935,n397:0.00000200000100005818):0.0036943629117225855,((n105:0.006398753489786343,(n432:0.0017451643616302373,n67:0.00000100000050002909):0.003066108770951979):0.004428781276696613,(((n400:0.012851189806531408,n213:0.005405493647679173):0.0005028261358714689,((n420:0.004470994754135119,n319:0.0019237091166170656):0.002407877433715053,(n77:0.0021548944618763988,n402:0.00126031942235485):0.005883902055757994):0.0012445975170755214):0.0035122918428228188,(n292:0.014879015109134149,(((n331:0.0011146470175285212,n31:0.00000100000050002909):0.0011100064306372973,(n51:0.004448205612240055,n277:0.0005619081772596814):0.0016539630564103287):0.0016601226871061307,(n453:0.005404223743670925,n17:0.009164821840681401):0.00000100000050002909):0.0003847148088094351):0.001017235842812267):0.0003410013381594456):0.0013752317101677143):0.0005193911264846482,((((n481:0.008615254509572788,(n455:0.010688022118485924,(n23:0.010508040605288487,n117:0.002152639662690725):0.0015357949097691364):0.0050644869454477565):0.001780126841194708,((n169:0.003478023609603323,n172:0.002882588563789038):0.005981542173074596,(((n35:0.0005384511674041499,n18:0.0010984787664255358):0.006227746596954657,(n248:0.00000100000050002909,n129:0.0035712104443298746):0.007156771133998901):0.00000100000050002909,n283:0.007004221102614572):0.0005066629527191469):0.00000100000050002909):0.00020399053178784488,(((n259:0.0074781800999000345,(((n251:0.0051256368834423595,n95:0.009577590277533325):0.0028292190017994512,(((n442:0.005018800323523667,(n98:0.00698984417295676,(n285:0.0036021722198793698,n245:0.001195307236753161):0.00000100000050002909):0.004485165458074613):0.0027319824762038433,(n183:0.00000100000050002909,(n99:0.0005453830060246477,n200:0.0030030463633741312):0.0022001642563442415):0.00000100000050002909):0.0019269259423341473,((n270:0.0005427425517203228,n274:0.0011882088774147735):0.0015891800336029847,n297:0.007360050913972356):0.002681579736183121):0.0012034502669089637):0.0011861468201710683,(((n184:0.006531605426045449,(n20:0.0012877325192057695,n76:0.0006073658573044317):0.0072557478392976885):0.01442493381973318,n302:0.0025762607393865116):0.002753623301841884,(((((n141:0.007723787600285418,(n89:0.0073042927544761365,((n160:0.0119295971256032,(n438:0.005702314133965327,n224:0.0038712575326694796):0.0031655745936048432):0.0006692554286861778,(n50:0.004864132093076615,n237:0.00759154079845727):0.0013062567740715376):0.00000100000050002909):0.0010283176452112995):0.00000100000050002909,(n238:0.002256182475879619,n255:0.0005103865504098378):0.007252127950036485):0.0006871648219422295,(((n189:0.007839669722269465,n450:0.008513367035100642):0.004203204139489664,n345:0.01312041732627326):0.0016480510639058422,n209:0.009121934997735698):0.0005825145542091541):0.00000100000050002909,((((n273:0.010876076264032246,(n340:0.00000100000050002909,(n434:0.00000200000100005818,n14:0.00000100000050002909):0.00000100000050002909):0.012943776784697894):0.0016588174574183345,n441:0.0038622217494677967):0.00000100000050002909,((n32:0.0012249463609954427,n211:0.0035972096622484432):0.000959544262928892,(((n210:0.006246600784610114,(n377:0.003544022026481853,n468:0.0032861840374644167):0.0025455110924782805):0.0005888260421327565,(n440:0.004293212587919968,((n306:0.003436850477022041,(n405:0.0011760322870866629,n258:0.00000100000050002909):0.0022580726851749683):0.0022050377125013986,n425:0.004215843623403361):0.0034157984936351313):0.0006097594914164432):0.0002954825385483776,n78:0.005090603477218929):0.00000100000050002909):0.0015554826789462462):0.00000100000050002909,(n364:0.0038004154965944744,(n145:0.0017215667494347969,n388:0.0027482383627211063):0.007809298408765022):0.0016782386407213125):0.0003867533724599537):0.00000100000050002909,(n73:0.005703374410677832,(n79:0.007439691060926963,(n26:0.007223797765653118,n381:0.011626422492015589):0.00000100000050002909):0.0004621642432165562):0.0008495658938221964):0.00039962246984816133):0.0024460541983443527):0.00000100000050002909):0.00042136060654394746,(((((n403:0.0016123204470135048,n320:0.004049749900756931):0.0033511294401139063,(n480:0.006161716878876761,n287:0.00980786211593047):0.004621432194997926):0.0007510897405327577,((((n93:0.0017245655584269292,n418:0.007866257006620183):0.0012097121931590748,(n103:0.0006054557575813479,n137:0.0008454530619805024):0.006325939757896484):0.004657846251480151,(n311:0.010129287758766045,(n436:0.0024960899970347954,(((n130:0.006892756272082199,n332:0.004900485087566108):0.0029833417520705443,((n0:0.0008508832594296785,n289:0.0018306746147702894):0.00028187938759395483,n360:0.000586488812057025):0.000851599639311084):0.00024436503002971187,(((((n337:0.0011181796963473476,n157:0.000597483762043412):0.00000100000050002909,n286:0.002878305452944576):0.00000100000050002909,n197:0.004434248327427512):0.00000100000050002909,n472:0.0010240421364443046):0.0005065525486747984,((n36:0.0005763047588098111,n475:0.0012388692924767254):0.00000100000050002909,n367:0.00000100000050002909):0.00000200000100005818):0.0013121545994654524):0.00000100000050002909):0.0013444319295766406):0.00000100000050002909):0.003288872664665272,(n10:0.005746634820845794,(((n416:0.0019738358446385914,n56:0.0006083824346695291):0.006502674406874731,n174:0.015849860458988826):0.00000100000050002909,(((n250:0.0020034074700252856,n140:0.002526829053630133):0.0016318665470460374,(n64:0.01942474952241702,n100:0.001388385657580203):0.0032569867489017595):0.0007458703776328042,n357:0.007558787692708981):0.0026962437675696165):0.0008061984995206551):0.0003917520773336314):0.002042036132350536):0.00021458955623233295,(n298:0.006121249502355935,((n369:0.00000100000050002909,(n414:0.005198089190710452,(n267:0.0005669025270416963,n185:0.00000100000050002909):0.00000100000050002909):0.002229167242202198):0.004619835430639687,(n220:0.0020645100698879885,(n392:0.006243738625459612,n15:0.003291807040848818):0.0010796274168672208):0.001967559753999946):0.0010002275962194952):0.000864339526083574):0.00000100000050002909,(((((((n48:0.0013009208730688166,n202:0.001583929304179364):0.0028148281574140732,((n356:0.0017396181892165843,(n321:0.0013351707742115014,n158:0.002367535140512526):0.0017927765611170069):0.0020571478515374066,(n372:0.016400341907637114,(n41:0.0028524801245274223,(n390:0.005178568441368616,n263:0.0016549181540740337):0.0016554013568818278):0.0014758920986434356):0.0008646049213279218):0.00000100000050002909):0.00000100000050002909,(n150:0.0011278471476696042,n63:0.00000100000050002909):0.004986943295836557):0.00000100000050002909,(n355:0.003798741839001158,(((n39:0.005745678319664914,((n380:0.003257844983023287,n218:0.0005414405425006392):0.006429930486843368,(n7:0.00099082133557096,((n262:0.0006630869986261596,(n338:0.00000100000050002909,n133:0.0005634483081129031):0.0016593685696136616):0.0013213825226894885,n125:0.0011363419575621285):0.0019772690192047275):0.0006546233745941159):0.00000100000050002909):0.00000100000050002909,((n5:0.018080718729595383,((n170:0.0056148352408594395,n217:0.001100642572175435):0.0016794573709946559,n361:0.0011369741943949292):0.00000100000050002909):0.0017057541631104623,((n144:0.001344596925712014,n396:0.00000100000050002909):0.006690111549346202,(n71:0.007995363605846847,n142:0.000565181920165989):0.0005388422101560497):0.00000100000050002909):0.001702670122374671):0.00000100000050002909,(n43:0.00758459356258742,(n229:0.0027688921603530527,((n214:0.002793298271726238,n175:0.0031532697928388664):0.00000100000050002909,n136:0.005218489646532101):0.003941647148315324):0.00000100000050002909):0.0016575394780027903):0.002607301385975055):0.0007379999238949896):0.0008865215916633291,(n152:0.011937160591181124,(n446:0.0032234445877924213,(n102:0.00000100000050002909,n109:0.0011078782794172227):0.0002826442666666284):0.002845023489924536):0.0007150320825787813):0.001021316325635453,(n226:0.004115207190810985,n291:0.010606507730867487):0.0037573431250953588):0.0008318567506211492,(n166:0.00953256525887181,((((((n188:0.0008928940483800098,(n177:0.013717305067303176,n54:0.0022200943724800153):0.00000100000050002909):0.0006881619392380502,n37:0.003950045697972354):0.00034246437501376554,(n399:0.0006033767295435558,n120:0.005799642093187005):0.004468912098093592):0.0006897513413419506,(n334:0.00000200000100005818,n460:0.0011633613250059795):0.0034008514396220192):0.0012159380691767927,(n305:0.0125868724251439,((n44:0.010792390689614784,((n336:0.00596058697369497,n313:0.0011558427330976776):0.0034287112291287204,(((n19:0.00000100000050002909,n108:0.00000100000050002909):0.0022259732223110337,n96:0.00000100000050002909):0.003048166818659991,((((((n247:0.0004918444830782253,n307:0.00000100000050002909):0.002411168498232156,(((n163:0.003375769362988027,(n113:0.00000100000050002909,n192:0.00000100000050002909):0.00000100000050002909):0.0011670195494571057,n382:0.002290225894458556):0.00000100000050002909,n254:0.003962623459239324):0.000582020523804285):0.00000100000050002909,(n415:0.00000100000050002909,n85:0.0006279135099404373):0.001254616028753919):0.00000100000050002909,(((n444:0.0011676372364650962,n194:0.002365780913969876):0.00000100000050002909,n326:0.00398210204346516):0.0005619321985469117,n351:0.0036223744781535014):0.001135937049640727):0.0009407205822878163,(n301:0.005524520024649776,(n190:0.002236028349335082,n94:0.00000100000050002909):0.00000100000050002909):0.000846732652468003):0.0003297993261445039,n471:0.004610511167337792):0.00034957163412647487):0.0010139431131213081):0.0017220302859749838):0.0006088690485455148,(((n366:0.005730519303821629,n134:0.006385375434533203):0.0007194925680556742,(((n280:0.002339401432611785,(n182:0.0029399266451357697,(n111:0.0012147360311904444,n359:0.000551845224967175):0.00000100000050002909):0.005078448837377591):0.0008942426607974073,((n317:0.002878249941475967,((((n204:0.0005519333694981311,n206:0.001168463807061266):0.004329310375877012,n127:0.008440537650598438):0.005154000448502268,n168:0.009336093087004229):0.00000100000050002909,n476:0.0017598309760710625):0.00000100000050002909):0.0006819001653232465,((((((n34:0.00000100000050002909,n398:0.00000100000050002909):0.00000100000050002909,n424:0.00000100000050002909):0.004115181848940359,((n231:0.00000100000050002909,n70:0.00000100000050002909):0.00000100000050002909,n135:0.00000100000050002909):0.013889902760953119):0.001636330802583177,(n284:0.0033984209803890656,((n46:0.0016858504588481025,n112:0.00000100000050002909):0.0011336408929890833,((n212:0.00000100000050002909,n115:0.00000100000050002909):0.00000100000050002909,(n119:0.00000100000050002909,n228:0.008047382419107855):0.0016988063029644196):0.0008742166667498533):0.0022123107003064):0.00000100000050002909):0.0013587133057561685,n153:0.002386614708342847):0.00000100000050002909,n464:0.0015417417176319382):0.00000100000050002909):0.0012215641763525604):0.0016771510517284008,(n128:0.005206312029580738,(n445:0.0048714327243151384,n443:0.000588614380020403):0.0025158325186239276):0.004723290971135156):0.0006307881938707826):0.00000100000050002909,(((n349:0.005571056414414901,(n467:0.001147099690910695,n383:0.0014911657249336353):0.0007332533831817133):0.00000100000050002909,((n110:0.0005612708683106365,n186:0.0012342257513528302):0.00000200000100005818,n236:0.002939416929408386):0.003412096963261854):0.004529896199749267,n83:0.0050125318096956245):0.003914301412395926):0.0003677250036804034):0.0010960552178642038):0.00020830632172303947):0.00000100000050002909,(n451:0.007474944656894168,(((n138:0.000737932861230814,n358:0.001056074772430936):0.0018465263473105896,((n69:0.0008669174209014823,n75:0.00000100000050002909):0.003985128044478199,(n199:0.0012342012789742294,n187:0.0017678066646575122):0.0027234397298603256):0.0007325361404440911):0.000981641056578493,(n155:0.003377654346227989,(n9:0.009204111000335639,n52:0.004418806089236832):0.0020169465933777024):0.0003779808280926804):0.001488567846235903):0.0019205839590591854):0.00019145466330004418):0.0008233362068560629):0.00017989589276564547):0.0010756357789110883):0.00000100000050002909,((((n8:0.00510873235699869,(n244:0.0008298453676588929,n269:0.01023776114686149):0.0047382626570459585):0.00000100000050002909,(((((((n344:0.004485986907747549,n276:0.0034246725553315556):0.0009520609997344571,(n447:0.006205239333090043,n324:0.003895218076926002):0.00000100000050002909):0.00000100000050002909,n252:0.007248874604080963):0.0019273921327601063,(((((((n387:0.005568611258837958,n417:0.0055817391844260895):0.0005327297373680188,(n2:0.003907746053512015,n3:0.002825955250696127):0.0011006154451071155):0.00000100000050002909,(n246:0.0017416701850021452,n66:0.0018119106365263038):0.0011069914539199787):0.0005479199020793893,n122:0.0052271900346376595):0.00000100000050002909,n222:0.023453603773447823):0.00000100000050002909,((n391:0.008029132262039055,n171:0.007065873172975662):0.0014863818455867106,(n310:0.00000100000050002909,n323:0.004056762847788078):0.0005309369283857292):0.001620192969984907):0.00000100000050002909,(n348:0.008348796334492953,(n304:0.0034618337884594124,n439:0.0063460782864042335):0.001142279291578264):0.001086516455308763):0.0006465095561787676):0.0007272682259659369,(n423:0.0005626935186066398,(n379:0.004038715221360008,(n27:0.0005550065037552069,(n25:0.0016591957530085963,(n162:0.012659844218046286,n368:0.00000100000050002909):0.001928981059179933):0.0012840167084484854):0.0006384690760043694):0.0012716878266212776):0.0019154443597549323):0.00000100000050002909,((n318:0.01363274831975031,n462:0.0039843657850101525):0.00033888086017428917,(((n241:0.0016443477723478363,((n161:0.010042841880453493,n243:0.001652215590985376):0.0029807082306344936,n261:0.0012621128021918554):0.00000100000050002909):0.004154596142289526,(n309:0.010199695588038958,n384:0.003374425660880394):0.0006876931217937705):0.00000100000050002909,n230:0.008886012205053298):0.00000100000050002909):0.0012601862903990988):0.0004493855665842415,(((((n353:0.006827321828848369,n421:0.00389516150567424):0.0012969416008212172,(n242:0.00000200000100005818,n429:0.0006533801493068435):0.005486775870349596):0.0005408464920614755,((n335:0.0076650542674265906,n55:0.004476446191215092):0.0032512141308519865,((n225:0.003750289367191499,n60:0.0024838063127689404):0.007036641881167829,(n45:0.015600496800914429,n328:0.004125630424101931):0.00041022899218929725):0.00020423639667653412):0.00000100000050002909):0.0006401464492625512,((n201:0.003511660951389246,n316:0.00000100000050002909):0.0026800009460570457,(((n266:0.00000100000050002909,n265:0.00046046817896640453):0.0013440854399921292,n260:0.003629750128139701):0.00017226064892832506,n154:0.004531019372980558):0.0012737607480751156):0.004237971062630933):0.00000100000050002909,(n281:0.019127290322635902,(n207:0.005450218969150593,n469:0.008932070128109355):0.00000100000050002909):0.0005431300045306975):0.000468214584139812):0.00000100000050002909):0.00000100000050002909,n459:0.004509789789966489):0.00000100000050002909,((n88:0.01444388637952677,n314:0.0008343604801076851):0.0017607148502323448,(n240:0.00694269274995662,(n239:0.0059468800347677485,n346:0.007926971158687485):0.0009666976980186766):0.00000100000050002909):0.00000100000050002909):0.0004343013609430851):0.0005799240474278426):0.00024235760674297388,(n146:0.0007914945985590072,n82:0.009326035599637775):0.00952902504880527):0.00018307116306988774):0.00000100000050002909,(n288:0.0017283855539333808,(n315:0.007494180427086657,n80:0.0019059792944955273):0.00671491254860014):0.0024109444447037156):0.00018494169306840208,(((((n327:0.0033497986843245833,(((((n339:0.010425284164945092,((n208:0.00513388565678349,((n235:0.0003932495513934615,n347:0.0007776479377020733):0.00000100000050002909,((n322:0.0012707729042414908,n216:0.0005650178281283984):0.00000100000050002909,n81:0.002924760123670483):0.0015297355725544103):0.0004610339021554412):0.0015389187703203863,(n271:0.005613038289839938,(n92:0.003810811106990471,n275:0.008391247459593767):0.0014613820414190542):0.00000100000050002909):0.002250152805481105):0.0004608973941458861,((n1:0.00871909168054558,n401:0.0038767445006664884):0.0011211735514293129,n121:0.0011028345601157852):0.00000100000050002909):0.00199132680420523,n296:0.0071443030679612775):0.00000100000050002909,(((((((n378:0.0039557113177134205,n91:0.00000100000050002909):0.0028079849685368474,n343:0.002256599129661318):0.0028636696396355616,((n181:0.0011853123429825755,(n107:0.00000100000050002909,n386:0.00000100000050002909):0.0029490062116823606):0.00000100000050002909,n90:0.001620364562176313):0.0030406900757725844):0.0015181877319935726,n299:0.0048107909043575234):0.000255830372369066,(n59:0.0004853326570154705,n461:0.0033995878478606093):0.003919435905275395):0.000247099602160313,((n178:0.00575184025255487,n308:0.005414331881314268):0.004688588873355659,n374:0.010177347330500174):0.0005652809217977636):0.00000100000050002909,n106:0.007978729408989279):0.0007392422834336034):0.00000100000050002909,(n57:0.0006848909753725405,((n295:0.0011610999098181974,n300:0.0022496085311429375):0.0011256317245203903,n329:0.002767655277894094):0.005558297961817707):0.00000100000050002909):0.0005247118360814084):0.00000100000050002909,((n58:0.007119218147644386,n473:0.0009417011813830067):0.00199036130342636,n72:0.0056492346002084415):0.0007995942219820945):0.0014324732792413257,((n195:0.003959629748392861,(n139:0.0016669994360672328,(n278:0.0016865970789009539,n84:0.00000100000050002909):0.003545554546588615):0.001556696936076927):0.003895823099523526,(n389:0.004159645784946628,(n151:0.0059464096291926265,n373:0.004274586223979739):0.002842789350558623):0.0010097947024906232):0.0002468416299257529):0.00000100000050002909,((n330:0.010364807032059067,((n428:0.00000100000050002909,n179:0.0026101822264451026):0.008256317675112108,((n38:0.0019516525718574996,n101:0.0033008989281187247):0.00000100000050002909,n413:0.004523968996429631):0.0008577917602023767):0.0013211608197106954):0.0004315516863836155,n449:0.00620146619709036):0.00000100000050002909):0.00042271347784433947,(((n233:0.013509333792805505,(n341:0.010221169550889597,(n193:0.00000100000050002909,((n167:0.00000100000050002909,n29:0.00000100000050002909):0.004914079962908007,n6:0.00000100000050002909):0.00000200000100005818):0.005821364761727146):0.0012511616780892666):0.0003139621790075049,(((((n249:0.011701140246275948,n376:0.007301302337075283):0.0024007772513852583,(n16:0.006746076073437229,(n68:0.00557386389516096,((n354:0.008925816386251373,((n118:0.0004565483601068438,n465:0.0018570388658106535):0.0004562969993163233,n477:0.00000100000050002909):0.00045567907803736033):0.00000100000050002909,n116:0.001650928960858586):0.001820472370157322):0.001358541769922605):0.00000100000050002909):0.00000100000050002909,(n61:0.0047969056523868665,n466:0.0029122943060641677):0.0003962424136764162):0.0006174291183671598,(n433:0.0039942126732485424,(n159:0.01432099610152723,((((n412:0.003909926458513095,((n482:0.0011076560903422639,n148:0.0027659948088445195):0.00000100000050002909,n176:0.0011467252138384625):0.004631116837606771):0.0005675222830125094,n232:0.006522882887021262):0.00000100000050002909,((n333:0.00184198258579973,(n294:0.00000100000050002909,n404:0.0017832816855984186):0.003732600714476155):0.00000100000050002909,((n47:0.00000100000050002909,n24:0.003150095161247364):0.0025100831697401284,(n13:0.0011032741849297473,(((n457:0.0007438226536516551,(n350:0.00000100000050002909,n470:0.00000100000050002909):0.0005489208931975156):0.00000100000050002909,(n124:0.00000100000050002909,n123:0.0011008641405566863):0.002209121561438609):0.00000100000050002909,n363:0.0008448281798400239):0.0016141873501926516):0.00000100000050002909):0.0008018964008572759):0.000977645543048157):0.0011158037129108422,(n474:0.002014930960805244,n4:0.0027399668535575262):0.0019739565893193704):0.0006805185082924488):0.0004169942383668669):0.000449003828968361):0.00035100923175222727,((n303:0.004705870541281984,n458:0.0029153064547658694):0.0028436180339184336,(n223:0.0092474867344396,n147:0.0029055746159973267):0.0013072964744213352):0.00000100000050002909):0.00000100000050002909):0.001615746221815642,((n456:0.0033783977317560572,n411:0.005659532236019842):0.0037371951516067567,(n290:0.001096129296164114,n215:0.004338667545703477):0.0021585897183977742):0.0009456533838121712):0.00000100000050002909):0.00019915457175773791):0.0011534644531795161,n448:0.006443018239289748):0.0005350859528815916):0.00155338016717616):0.00371219833377697):0.0010290401330016782,((n257:0.013651859171573853,n87:0.013048958659452806):0.004445330971092991,n454:0.014591383521143562):0.0004184266998464832):0.005145952848500247,n393:0.01000345086543833):0.00000100000050002909):0.04021075967788578,n65:0.08217101620436952):0.011669355582810403,n114:0.057600460748340236):0.05384173885452051;
	TREE 'Imported tree 4++' = ((((((n430:0.017072745636574738,(n74:0.010157769378425647,n143:0.015475425800779812):0.003207377346319088):0.0009598610812908898,n406:0.020018380909832857):0.0008833343256487294,((n86:0.014284949993746788,(n431:0.011047991307863136,n253:0.008360064693491029):0.004247728905127111):0.004021638707456081,(n279:0.021839696952926622,((n264:0.0038969061796320834,n463:0.006347758226970691):0.005279306498393793,n385:0.008138169214431643):0.0035246285779297172):0.001601040870849936):0.001661794241023954):0.002111505860984452,(((n33:0.014470541685705269,((n21:0.00419015268977328,n448:0.0066387930816009955):0.0007186110376843951,((n227:0.005064907544809316,((((n395:0.0065175904052162635,(n196:0.009283384686702593,(n437:0.0034846232163180547,n42:0.00000100000050002909):0.0009301455814584045):0.001374090198798653):0.00038912754053136166,n272:0.0069564470925597395):0.0031137023958709253,(n268:0.0017602960340296942,(((n165:0.0006258933642454786,n49:0.001971291961996191):0.0016134530829262847,((n205:0.00000100000050002909,n256:0.004121840934394025):0.0002892824108195767,((((n408:0.00000100000050002909,n410:0.000524107971769868):0.003994548477124102,n104:0.004768009663961505):0.00027822528130699197,(n407:0.00487338405327762,n22:0.0045540432638293766):0.000984442776126801):0.0008323214955466977,((n312:0.0017107801924862041,((n219:0.0025919195837794972,n409:0.0034102927558218453):0.00000100000050002909,n53:0.005089499721713972):0.00000100000050002909):0.002331611759804111,(((n191:0.006113063289409597,n370:0.0006126549840305352):0.00000100000050002909,n180:0.001277579320946272):0.001316420670824437,(n325:0.004428009538065639,(n282:0.0010584178246699307,n40:0.00000100000050002909):0.0007061365041191735):0.0006068594327809406):0.00000100000050002909):0.0006031940939937398):0.0006017018751781871):0.0006058112579473036):0.00023852967496827424,n362:0.006519994487135806):0.0002808381021233332):0.0018894363273638248):0.00021663397772503164,(n62:0.008340421282082412,((n478:0.008507723098749951,(((((n479:0.009178512145045925,n426:0.005116600025858706):0.0003597214387093701,((n394:0.0018738442677598912,n156:0.005927774729389355):0.002419737532000313,(n221:0.00000100000050002909,(n234:0.00000100000050002909,n342:0.00000100000050002909):0.0011398380567867207):0.003435519331025243):0.0012119670239316173):0.0012426797027273516,(((n352:0.0033746368177034894,n419:0.005151717039318466):0.00022747956501265694,((((((n28:0.007479781956655446,(n97:0.005033212630400371,n452:0.002712835212401072):0.00000100000050002909):0.0011420688601039243,n293:0.00429765056987902):0.00025922754259310115,(n30:0.008980100732783873,(n375:0.0016126219294187298,n371:0.001626232090232459):0.0018435981208835255):0.003625959735499421):0.0005487123435188702,n11:0.007326877187620204):0.00000100000050002909,(n126:0.003627375033093069,n173:0.0015319610323020398):0.0007730309752174794):0.00000100000050002909,(n435:0.005745824643508043,n131:0.00137831393088392):0.0008973474721194397):0.00000100000050002909):0.00000100000050002909,(n365:0.00000100000050002909,n164:0.0010289194999768716):0.0023995166996842268):0.0003434112131585953):0.00015200293087707606,(n12:0.00596273819972483,n149:0.005732242417308486):0.00000100000050002909):0.0016261058337764742,(n198:0.004921917113973361,(n427:0.0028721130628020946,n203:0.006055567450784837):0.009570485904369602):0.0009032350295554592):0.00000100000050002909):0.000559874857963732,n132:0.005168872359800444):0.0002088631070949885):0.0011685219767147185):0.00016130088132444096):0.0008237862674497655,((((((n277:0.0005143183220046847,n51:0.007675177819552251):0.00000100000050002909,n17:0.005839908383064006):0.0004389169092287453,((n453:0.0022013247027001036,(n331:0.0012329841086016645,n31:0.0005308993050799134):0.0018446780868996706):0.00000100000050002909,n292:0.008144151252072398):0.00000100000050002909):0.0013299155656736946,((n105:0.006897817692934705,(n432:0.001598173567858568,n67:0.00000100000050002909):0.0023957580504013827):0.002795103546644498,((n400:0.010054622508694305,n213:0.005687968854495068):0.0006645073328956262,((n420:0.0051173076393746806,n319:0.0027169400903181377):0.0018555842107532347,(n77:0.002405657830298439,n402:0.0011382993586599248):0.0026712038557692476):0.0008720184292875618):0.002174011454163167):0.00025436262787792554):0.0013641216364212185,((((n169:0.003681985281874797,n172:0.005052257950756482):0.005337159049785959,n283:0.004526590794384677):0.000882632324800423,((n481:0.007895732390824195,(n455:0.007604458628814116,(n23:0.009350788893141896,n117:0.0031241981759581655):0.0022807831954507088):0.0016446040815508503):0.001622686380325033,((((((n177:0.010377456386978554,((n188:0.0011075362957635169,(n37:0.005628028990829986,n54:0.001965146465667622):0.001209741663163448):0.0007266785625735608,(n399:0.0006029561206921792,n120:0.0013402112166553636):0.0034112735190835334):0.00000100000050002909):0.0020667516898237527,(n305:0.011053033910789874,(n334:0.001880536991520079,n460:0.00000100000050002909):0.0053118915589286985):0.00000100000050002909):0.0011585600940382675,n88:0.011706073515631138):0.0013785040377327885,(((n93:0.0028459493683350486,n418:0.006692724458498921):0.0026298621543402096,(n103:0.0010462494195942443,n137:0.002891879898147345):0.009849729642567025):0.0027915076776426407,(n35:0.0009784656611535967,n18:0.0005028517643957729):0.0024918822893303457):0.0016480723518353406):0.00027719108363239315,((n259:0.006707377641766011,((((n242:0.00000200000100005818,n429:0.0012794956012038509):0.004848954390678301,((n225:0.003937331281728486,n60:0.0032886908830578147):0.0054925314745085975,n328:0.0057534710855639565):0.0004439942032881376):0.00020785423109639627,((n421:0.004542954180550283,(n335:0.003885016282012278,n55:0.008274947230435314):0.0012358827865041023):0.00027879500190913266,(n162:0.01119703346847558,(n45:0.010333107243620852,n353:0.003181312698309788):0.00031743699286689773):0.0009505059795624636):0.00000100000050002909):0.0008452714551035961,(((n201:0.0011157067613750357,n316:0.0011402485886104724):0.004551272164646917,(((n266:0.00000100000050002909,n265:0.0004198445180896992):0.00000100000050002909,n260:0.0076756980864643295):0.00000100000050002909,n154:0.006047888669089149):0.0015951951422855156):0.0039526493762722095,((((n237:0.006331704649159185,((n189:0.003333384751502853,n450:0.00952876834245032):0.0033664970014645303,n345:0.015117834070846636):0.0010137860517250375):0.0015321903014268617,((n50:0.010875105253653233,(n89:0.00620717045180571,n209:0.015242313100505589):0.0015122146689258013):0.00000100000050002909,(n238:0.002043769261194101,n255:0.0010017963339125832):0.004608439468285563):0.00000100000050002909):0.0005109202841801556,(((n73:0.0059430387528344114,(n79:0.0024519489373521306,(n26:0.009715488955170132,n381:0.009380763721237969):0.00024133726832700902):0.001225404006440392):0.0003882500723656866,(n145:0.001576887841898533,n388:0.0010067446257723705):0.01180950444823129):0.0003795330719543747,(((n441:0.004552900005106143,n273:0.014668881268841256):0.00000100000050002909,(n160:0.009520810588234195,((n364:0.006378255585983377,(n340:0.00000200000100005818,(n434:0.0004999536813055378,n14:0.00000100000050002909):0.0015008770731298757):0.010890665836842225):0.0010310824946020297,n141:0.00598816626134341):0.0005434688303657353):0.00000100000050002909):0.00000100000050002909,((n438:0.0038435646036570235,n224:0.006139819795964506):0.0017160546470949964,((((n32:0.0016999405210546422,n211:0.001771822862752388):0.00023945962507872153,((n78:0.0015876113878364477,n440:0.0025458054417552578):0.0002913073922104265,(n377:0.005695604200611101,n468:0.0008043346780379519):0.003108873474498642):0.0008887276001992388):0.0004840802623684455,n210:0.004589168013095929):0.00000100000050002909,((n306:0.004121134579355598,(n405:0.002167693257981561,n258:0.00000100000050002909):0.00000100000050002909):0.0010069827629753975,n425:0.0016446432345641985):0.002547181633066121):0.0010086353144736515):0.0005102437681931765):0.0010116106435714002):0.00000100000050002909):0.0011751399464704194,n207:0.005732767263982425):0.0011765599156243118):0.0001748749370594136):0.0009722793510819361):0.00000100000050002909,((((n240:0.005352733714554769,(n8:0.007742080410144952,(n244:0.0008674261113038482,n269:0.008655086410751443):0.006275448986392579):0.00000100000050002909):0.00000100000050002909,n314:0.002007717310593795):0.00025040204571413977,(((((n251:0.00661558481542262,n95:0.0051211445151348916):0.0020792708521311064,n166:0.00979662100513165):0.0024540458045515657,((n403:0.0014248171057530043,n320:0.003785050062247859):0.0017312687621429618,(n480:0.003689760782413954,n287:0.005416778445216898):0.003329842358835805):0.0002645752930550171):0.001465188651955727,(((((n152:0.008367122577372769,((n102:0.00000100000050002909,n109:0.001015134972924491):0.00000100000050002909,n446:0.004621746957385259):0.003853552638951702):0.001647780477848729,n298:0.004617763703375477):0.00040133843358409864,((n369:0.0016705114948441543,(n414:0.0021075892919478283,(n267:0.0005167167064007274,n185:0.00000100000050002909):0.00000100000050002909):0.0029539742454855037):0.001924122424992995,(n220:0.0021549685720182524,(n392:0.006458850069953616,n15:0.003586286360264055):0.002185249133868641):0.0015307169563517223):0.0005926827759254824):0.001050269834725214,((n311:0.00813048958314154,((((n475:0.0011338109796942956,(n367:0.00000100000050002909,n36:0.0015642910678189538):0.0005665832681774673):0.0007189705346845093,(n197:0.0030203310327141727,(n337:0.00000100000050002909,((n157:0.001099169758718873,n286:0.0005255737025230165):0.0005087118843079756,n472:0.00000300000150008727):0.00000100000050002909):0.00000100000050002909):0.0005904336015421358):0.0010395022140594064,((n130:0.00883438661083577,n332:0.005996115394411229):0.002430980068466522,((n0:0.0009146383861962118,n289:0.0033647489814015784):0.0003064707212389146,n360:0.0016045240708937758):0.00030797640354141936):0.0005309651376168473):0.0005994562856174135,n436:0.0017884365690923824):0.0011028314713825355):0.0029699003178093666,(n10:0.005837029592317015,(((n416:0.0005182477919430955,n56:0.0006893661704820846):0.0055531561072065935,n174:0.010168010267114915):0.00000100000050002909,(((n100:0.0003923932788312319,(n250:0.0013733942443403784,n140:0.00231196207119158):0.001841024392327613):0.00028459727131235224,n64:0.01376247919134793):0.0017834046833147368,n357:0.009064276523221663):0.001983826280667026):0.0004313533620156069):0.00044197110193707904):0.0015858259442929799):0.0004760846645345986,((n318:0.010621935639513061,((n5:0.016887687910488832,(((n150:0.002086547160915202,n63:0.00000100000050002909):0.0010117492776173641,((n356:0.0021338288745923386,(n321:0.00000100000050002909,n158:0.0009911677578895912):0.003858036371085921):0.002410694791100839,(n48:0.0015524022745799053,n202:0.0018825518542479752):0.004329838400324113):0.00000100000050002909):0.0008095656960354196,(((n469:0.008265240329069584,n355:0.00000100000050002909):0.0020305059593328915,(((((n229:0.001526258886147703,((n214:0.0010003826500788748,n175:0.00542957091636613):0.001237852099560848,n136:0.0010691954844175252):0.002953072808112362):0.002111868117873354,(n144:0.003461138468160827,n396:0.0018470448633255586):0.002601353318841302):0.0005176284012016279,((((n7:0.002248453326779798,(((n262:0.0015005310694835518,(n338:0.00000100000050002909,n133:0.00000100000050002909):0.0015249358489398035):0.00000100000050002909,n125:0.002092395738219397):0.001488484572224464,n217:0.00000100000050002909):0.00000100000050002909):0.00000100000050002909,n361:0.0005253029575422816):0.00000100000050002909,(n43:0.005949641503510507,(n39:0.0026311906283816647,n170:0.0020632304715733634):0.00047877105359924436):0.0010337295192815708):0.001800019385546235,n142:0.0015268990427020203):0.00000100000050002909):0.00000100000050002909,(n380:0.00000100000050002909,n218:0.00000100000050002909):0.0036106529201929975):0.00000100000050002909,n71:0.008905421373626687):0.0009431162223847156):0.00092889832429764,((n41:0.003068058602289558,(n390:0.0058228652569594355,n263:0.0015360673987447789):0.0030595936813655735):0.0020849899971431577,n372:0.01572248817546907):0.0004069142560892118):0.00000100000050002909):0.00000100000050002909):0.0004674050824001212,(n226:0.003687409959103156,n291:0.005325114170957093):0.00359617029195461):0.0010505385000100505):0.00039384710242924283,(((n451:0.005270185313551171,(n155:0.0056554332208486255,((n9:0.011624476878565456,n52:0.00529405776135977):0.0012556741416868277,((n69:0.0014992346328371255,n75:0.00000100000050002909):0.0024918029702255913,((n199:0.0011455708915028384,n187:0.00000100000050002909):0.0026019447518589463,(n138:0.0010587261171321589,n358:0.0013453779341554076):0.0020270746644689185):0.0003343375953512135):0.00031369440553286006):0.0006764013455551424):0.002598376989544262):0.0036187246532518535,(((((n464:0.001444435438601835,n317:0.0021889607737801):0.0002879796554028023,(((n476:0.0010810421048704335,(((n34:0.00000100000050002909,(n398:0.00000100000050002909,n424:0.00000100000050002909):0.00000100000050002909):0.001649345443498591,((n231:0.00000100000050002909,n70:0.00000100000050002909):0.00000100000050002909,n135:0.00000100000050002909):0.01063430059156374):0.0005927640242432434,(n284:0.0028924949031095223,((n212:0.00000100000050002909,n115:0.00000100000050002909):0.00000100000050002909,(n119:0.00000100000050002909,n228:0.009972694300360067):0.0005866751495478923):0.0005739558614078149):0.00000100000050002909):0.00000100000050002909):0.00000100000050002909,n153:0.005005989848085067):0.00000100000050002909,(n46:0.0015617902724222863,n112:0.00000100000050002909):0.0015616453503736493):0.0003176709475772626):0.00032460445669294717,(n280:0.0020072111090272946,(n182:0.004823833321063478,(n111:0.0007656031685776862,n359:0.000503837029288238):0.00000100000050002909):0.003375448321937558):0.0001909019477501875):0.0011265301592950974,(n127:0.005870662067364363,n168:0.009179552234913083):0.00000100000050002909):0.00000100000050002909,(n204:0.0005119306176233017,n206:0.00000100000050002909):0.004588815129701555):0.00000100000050002909):0.0016114117412527604,((((n44:0.0062046497535555006,(((n236:0.005375508290485921,n110:0.0020285976090262544):0.00000100000050002909,(n186:0.001680211796842576,(n349:0.0060991164127234924,(n467:0.0005251232755638513,n383:0.00000100000050002909):0.0011468451306495195):0.00000100000050002909):0.0005692307224128937):0.002523280213648506,n83:0.0033505899159988833):0.00149964734036901):0.0017261665306025453,n366:0.004063155452462304):0.00000100000050002909,(n134:0.002461904615338651,((n445:0.002638265349448975,n443:0.0015835069154933764):0.00000100000050002909,n128:0.0031983845982450233):0.00415789268994971):0.0014832453402573921):0.00017458183127660188,((n336:0.0032792670439274426,n313:0.00000100000050002909):0.002643241034031278,(n190:0.0015530009113901696,(((((n326:0.0015635609515734102,n444:0.0010843585113154196):0.00000100000050002909,n351:0.006219588907449163):0.0005210980566068196,n194:0.002741359970365085):0.0005178388903689925,(n301:0.006021861262672966,(((n254:0.0025940555470429904,(n247:0.0011753545135219075,n307:0.00000100000050002909):0.0010281661252291672):0.00000100000050002909,(n108:0.003520653892310161,n96:0.00000100000050002909):0.0015742991270131421):0.0007827181979513537,(((n163:0.0041418126864659725,(n113:0.00000100000050002909,n192:0.00000100000050002909):0.0005306324629115939):0.00000100000050002909,n382:0.0031446063636970853):0.0005302502377912108,((n415:0.00000100000050002909,n85:0.0006957996103739581):0.002438723331966679,(n471:0.0034847687315546897,n19:0.0009516451580751882):0.0005471157113413741):0.00000100000050002909):0.0008739478426132804):0.0007340312013975804):0.00000778393303476096):0.00000100000050002909,n94:0.0005180152015506927):0.000446245394822753):0.0011666191270881237):0.001068500015786914):0.0011749073656326394):0.0010439325623773038):0.0007538202774497122):0.00000100000050002909):0.0005149660177822893,((((((n387:0.0035560864246487363,(n348:0.006962107291828643,(n304:0.002091231970438337,n439:0.002634689397462885):0.004080220572530698):0.00000100000050002909):0.0010089277103551518,((n246:0.0021519989815448927,n66:0.0028367511788524513):0.0015176691563939327,n122:0.0023192792576521865):0.00000100000050002909):0.00000100000050002909,(n417:0.004607400601374288,(n2:0.0030873193191125986,n3:0.0047919713854827385):0.0010051048283051822):0.00000100000050002909):0.00000100000050002909,((n391:0.0036488958913565295,n171:0.006466574391610975):0.0010600472948438244,(n310:0.0011858174850254688,n323:0.003204320369429898):0.00000100000050002909):0.0009049004007926235):0.0004774250921912067,(((n309:0.007819351971392339,n384:0.0036726831711431287):0.0005826926916257992,((n241:0.004035039501004801,((n161:0.013521487660505292,n243:0.0019828035257003543):0.0030828439527486296,n261:0.0011464624357992185):0.00000100000050002909):0.0023070610198871484,(n230:0.0041112836081734485,n462:0.0026271873511392917):0.00000100000050002909):0.0009073664207102566):0.00000100000050002909,((n344:0.004621021236505535,n276:0.0017939776582726046):0.004098080736648167,((n252:0.0025657089800970845,n447:0.006824430670102965):0.0004937128999923953,n324:0.001017397271216826):0.00000100000050002909):0.0004503239968035479):0.0006974865928829764):0.00000100000050002909,(n281:0.00916866951366376,(n423:0.0005142831879147538,(((n379:0.00210190366698854,n27:0.000504960746384956):0.00000100000050002909,n368:0.0025842243522837317):0.0020210152472190835,n25:0.0005095128681481219):0.0005076625182104396):0.0010003104644527945):0.002059238141734611):0.0008119777313537015):0.0011265062505698938):0.00000258236498803731,(n239:0.0031671272821434965,n459:0.004006026407081026):0.0007214870798931535):0.00000100000050002909):0.0003694793400807696):0.00000100000050002909,((n248:0.0006208273068990579,n129:0.0012428764222469834):0.005425998494175658,((n183:0.00000100000050002909,((n99:0.0005037385219344191,n200:0.0005500035234045685):0.00000100000050002909,(n442:0.0020312702372889814,(n98:0.007523361941774147,(n285:0.0026881213011876737,n245:0.0010505207115134598):0.00000100000050002909):0.004723402468313625):0.0007153386793066753):0.0010710916256555787):0.002565290941741296,((n270:0.0006632965460901948,n274:0.0010036787847643874):0.001487524972739349,n297:0.005566759962543203):0.0016405768025135553):0.0009892200307946594):0.0006575241154416655):0.00015003174019780012):0.00002878188056477065):0.00034692937951902504,((n288:0.005286874386389862,(n315:0.005192559659399613,n80:0.003699447270379524):0.0018778384516232613):0.003666604080318168,((n422:0.0017155398988270272,n397:0.00000200000100005818):0.0029194391349403014,(n146:0.00030050345656754997,n82:0.004554382737593489):0.003896467071912391):0.00024939367772318854):0.00000100000050002909):0.00000100000050002909):0.0001701870437079845,(((n139:0.0025853738839627456,((n222:0.013483704402641907,n195:0.004864742584497113):0.0004998989132183009,(n84:0.00000100000050002909,n278:0.0030726722275375732):0.0020855491522756273):0.002031469945975461):0.0028107324078130427,(((n389:0.006563557591099845,(n151:0.006443007138069644,n373:0.004195734467638015):0.0016908873306341397):0.0007333659483545501,((n330:0.005821706299467218,((n428:0.001270813001668546,n179:0.00000200000100005818):0.007451795511250687,(n101:0.00612466012105384,(n413:0.003135905765475864,n38:0.0016040117955632618):0.00025804881644452693):0.0013210675940561838):0.0008188102511172624):0.0005377536522399642,n449:0.007307382625233681):0.00000100000050002909):0.00000100000050002909,(n346:0.009735254729263232,((((((n374:0.009307441439702467,n57:0.003595535440080818):0.00000100000050002909,(((((n235:0.000357730247625928,n347:0.0017706913177486564):0.0003470088675683402,(((((n271:0.005646903686260649,n92:0.0051141057455188115):0.0012077951477813115,(n322:0.0006216413604933218,n81:0.0043097820822810785):0.0005971439534743963):0.00000100000050002909,n208:0.004919440120866017):0.00000100000050002909,n296:0.004247789140366267):0.00000100000050002909,n216:0.0005175133870493898):0.0007597169883373712):0.00000100000050002909,n275:0.009925254942861847):0.0005961119209815454,n121:0.0010129941768405209):0.00000100000050002909,(n339:0.00578181376677689,(n401:0.00000100000050002909,n1:0.0062878940445696115):0.0010275055473973622):0.0025256940109922173):0.0006130385715147439):0.001076373615097411,((((n378:0.0023412763197667797,n91:0.00000100000050002909):0.005566578185080275,n343:0.002672339608481028):0.0022731912743533013,((n181:0.0016450061852961138,(n107:0.00000100000050002909,n386:0.00000100000050002909):0.0004392354886811604):0.00000100000050002909,n90:0.0018564003882924117):0.0018996481138486166):0.0010692331708476094,n299:0.008960602317260199):0.00024216483241270098):0.0002445519511138426,(n59:0.0007842372016345597,n461:0.003118907601884572):0.00368332968033554):0.00000100000050002909,(n178:0.008470459383685243,n308:0.0028586155318870783):0.004391535976031672):0.00000100000050002909,(n106:0.0052399599132954165,((((n58:0.008789816442060368,n473:0.0008600519537293067):0.002324763831273092,n72:0.0050364788381609075):0.00000100000050002909,n327:0.003079867893682334):0.0005103460041897638,((n295:0.0010528061917765535,n300:0.00000100000050002909):0.0010317167837498378,n329:0.0035644639396867376):0.0071688089139531055):0.00000100000050002909):0.0010194297076764646):0.0006450137075004332):0.0019230784819395425):0.00018909399594573567):0.00018679688163883795,((n302:0.0035627223786171606,(((((n376:0.0067418822723716515,(n303:0.0024868142913176084,n458:0.004592114742721762):0.0016011673151182556):0.0027375920608660093,(n61:0.00629742267200299,n249:0.002993088220092862):0.00000100000050002909):0.0006327453543401357,(n16:0.0112183176063925,((n433:0.006024986957072044,((((n333:0.0005727170830629235,(n294:0.00000100000050002909,n404:0.0010840859399647831):0.004166022701312196):0.00000100000050002909,((n47:0.0007378091392506326,n24:0.00362338040711985):0.001665194261742883,(n13:0.0025426043270479473,(n363:0.0023774534169037453,(((n124:0.000537208976044419,n123:0.00000100000050002909):0.001008583027666348,(n350:0.00000100000050002909,n470:0.00000100000050002909):0.003029231449119234):0.00000100000050002909,n457:0.003612268309121195):0.00000100000050002909):0.0018212961012245516):0.00000100000050002909):0.0008646122465297927):0.0005884378883673233,n233:0.009400033272696583):0.0011801511594203386,((((n466:0.0035521550963631835,(n412:0.005155213281347404,(n148:0.002534781929852373,(n176:0.00042187295926804304,n482:0.002032023380186173):0.00000100000050002909):0.0016960589374345478):0.0004062503504772184):0.0025112284556032998,n232:0.004919184686555556):0.00000100000050002909,(n474:0.00000100000050002909,n4:0.005000341016902811):0.0035725938544976564):0.00000100000050002909,n159:0.011626080842100739):0.00000100000050002909):0.00023382753642955657):0.000490479839823252,(n68:0.003591375628566715,((n354:0.002029525169814801,((n118:0.0015835910446696181,n465:0.0033869014894020726):0.00039539337589083193,n477:0.001023835738935303):0.0003940173869636112):0.00000100000050002909,n116:0.001013033942584064):0.0011702041901296952):0.001979537268188581):0.00000100000050002909):0.0004641195787444389):0.0002331844446451503,(n223:0.008271062902877529,n147:0.003417927136972102):0.0009170289502141442):0.0011185595006589094,(n341:0.011223128939727746,(n193:0.00000100000050002909,((n167:0.00000100000050002909,n29:0.00000100000050002909):0.00401907702531756,n6:0.00000100000050002909):0.00000200000100005818):0.0046223099119219475):0.0021727176612476107):0.00062107490958302):0.00000100000050002909,(((n184:0.0023735747471161665,(n20:0.0034828417908107138,n76:0.0012746080469262587):0.003820183359875178):0.01157030051732885,(n456:0.0015374518588704836,n411:0.004923063910773903):0.002724757563927277):0.00000100000050002909,(n290:0.004124630299435009,n215:0.003226351826676965):0.0019836408029838552):0.001026042498132344):0.00000100000050002909):0.00016954212000397348):0.000839792903667865):0.00017318161221260755):0.0030819413612979346):0.002731492816720576,((n257:0.015258398653376429,n87:0.016092841621403377):0.0038567352299431292,n454:0.016397708748680184):0.00019991720769002656):0.0029533211682294005,n393:0.01579958888135341):0.0002960361555564317):0.0369597375701782,n65:0.07417978030115652):0.008912239667041905,n114:0.05439976125350537):0.05627919250048127;
	TREE 'Imported tree 5++' = ((((n406:0.01829325407917183,((n86:0.016472629873776894,(n431:0.010459760608703598,n253:0.008791219277735903):0.002581401173669437):0.004854941441574703,((n143:0.010529997155790272,(n430:0.016211146826063817,n74:0.011396050174335808):0.0019826013183627507):0.0022926796094556,(n279:0.0135084022503513,((n264:0.0057898966401574055,n463:0.0041244012411064375):0.003778530972062572,n385:0.011615773487956933):0.0041332045100438974):0.0023377304881163066):0.0011504482079654475):0.0014703550246547164):0.0010792176620855849,(((n257:0.010471372693303177,n87:0.013813100101921653):0.0060398496853425725,(n454:0.012426074467878525,(n33:0.009462866639992453,((n21:0.004437068294615924,n448:0.007356341946757329):0.0004405200837261881,((n227:0.005005081176931024,((((n395:0.006396418693848728,(n196:0.005415067707337263,(n42:0.00036438255863016953,n437:0.0042125540989926815):0.0032497566685518644):0.0005153931609719784):0.0007888397657463025,n272:0.010540446635987456):0.004689182569100987,(n268:0.0011330298612416976,((n165:0.0016069032507215453,n49:0.002477961662642126):0.0014248642219803435,((n205:0.0014850820129848397,n256:0.008676051163961394):0.00000100000050002909,((((n362:0.005438094678801145,(n408:0.00000100000050002909,n410:0.00000100000050002909):0.0017302472818843935):0.0005889994231591791,n104:0.001801348422124035):0.00000100000050002909,n22:0.004718563641511256):0.00000100000050002909,(((n312:0.002020883395769256,((n219:0.0033370807220604692,n409:0.0024457395277572027):0.00000100000050002909,n53:0.0032494540725960227):0.00000100000050002909):0.0026031700770605547,n407:0.0037363559559759323):0.00000100000050002909,(n325:0.004242406014259183,(n40:0.000563316828639977,((n282:0.00037915543016822206,n370:0.000617708593612049):0.0010902061516063824,(n180:0.001206149410710422,n191:0.004346728045142681):0.000888798531867539):0.0001539827782721617):0.00000126502710418902):0.00027048371578541826):0.0008641441292052244):0.0015863868140396243):0.00022800730230067366):0.0002510649065805081):0.002846884738634315):0.00023084171024108206,(n62:0.006059242191868306,(n478:0.009004432353782964,(((n132:0.007660753540681918,n198:0.004272082385695939):0.0012346154293306289,(n427:0.0025018766554956106,n203:0.002783196968884413):0.008729042730186102):0.00000100000050002909,(n149:0.0068097863531303175,((((n479:0.005163700932882594,n426:0.002077933613956466):0.0012058326571182747,((n394:0.0027308062867074027,n156:0.007576597056470189):0.0013575970935526096,(n221:0.00000100000050002909,(n234:0.00000100000050002909,n342:0.00000100000050002909):0.0007042935599232089):0.004250207205483338):0.0006735680620121072):0.0003199931060523966,((n352:0.003351063437008154,((((n435:0.003891679213481322,(n419:0.008496830073597224,n131:0.0019338404983843414):0.00000100000050002909):0.001250984728183369,(((n28:0.00983890532541372,(n97:0.005470734651937143,n452:0.005870766955445048):0.00000100000050002909):0.0005000471514430795,n293:0.003083487741381248):0.00025531832028556265,(n30:0.006210145699480605,(n375:0.003454521673391662,n371:0.0004939409684220245):0.00047655689016928664):0.0030990693468756336):0.00026914505618935724):0.00000100000050002909,n11:0.009646008260671312):0.00000100000050002909,(n126:0.0035240858070343327,n173:0.001490206757100869):0.000830592665831887):0.00000100000050002909):0.00028830396508847724,(n365:0.00000100000050002909,n164:0.0011832505122014727):0.0011707041818810795):0.0003253831856831958):0.00011302290389454017,n12:0.006122634125348406):0.00000100000050002909):0.001049358654182265):0.00025042707588844376):0.0013893980619816128):0.0013135592846063608):0.0001897386658738493):0.0005552582993822348,((((n288:0.0042868376375271265,(n315:0.008238531487202569,n80:0.0059036788469794075):0.0026260217494627975):0.0026339351765543354,((n139:0.0029841769901443726,(n195:0.004443061091611516,(n84:0.00000100000050002909,n278:0.002221450511699979):0.00000100000050002909):0.0008581120815936897):0.0014644605022867661,n222:0.021709529372883687):0.002816449019373663):0.000860502293594407,((((n18:0.00000200000100005818,n35:0.0005345577562745577):0.0035252421016706095,(n248:0.001285693153442756,n129:0.0011160470418180698):0.003195972600013173):0.0009984190916893442,((n169:0.00418632969298495,n172:0.005948110094318849):0.0032135786191940536,n283:0.003854872843278401):0.00000100000050002909):0.0005249174910138789,((n456:0.003346385048188847,n411:0.004879909398759435):0.002770985096534235,(n290:0.004455232404748376,n215:0.004642112546679614):0.0012522985026061355):0.0004023875872105945):0.0005760535639488569):0.00000100000050002909,(((n105:0.007457449254879995,(n432:0.0017722290389108261,n67:0.00000100000050002909):0.0033214601676727048):0.00288442819771711,(((n400:0.009707916325724812,n213:0.00000200000100005818):0.002064985898713555,((n319:0.003603058591916281,n420:0.004428290236244064):0.002702428488976579,(n77:0.0023805716320127483,n402:0.0007799793368939198):0.003466220452189095):0.001027792398204117):0.0019109262768654564,((n433:0.005122338809871005,n453:0.005836418079300717):0.00000100000050002909,(n292:0.006978822350729791,(((n51:0.007244437619829948,n277:0.001665435216736524):0.00000100000050002909,n17:0.004061475106771176):0.001032125448115555,(n331:0.000556253394551956,n31:0.000568883203454868):0.0005534804907110003):0.0005137669779385436):0.00000100000050002909):0.000534057520567922):0.0003265392019820788):0.0004969493664845579,((((n397:0.00000200000100005818,n422:0.0002899064782108358):0.003495557863910071,(n146:0.00026841562095072154,n82:0.004926565626831096):0.0065181198099664136):0.00000100000050002909,(((n330:0.007354711266439183,((n428:0.00486010481406025,n179:0.0005578758617354449):0.00707119798601855,(n101:0.004378265946968009,(n413:0.002816597752043683,n38:0.002558747340567891):0.0006887304116554493):0.0009044901265163962):0.0019243437769648315):0.00046512233102874776,n449:0.005941294575718288):0.00000100000050002909,((n242:0.00000100000050002909,n429:0.00000100000050002909):0.0053930776890971505,((((((n58:0.009263213316686725,n473:0.0013877133923653675):0.004027984158807923,n72:0.005729707540397805):0.0003691808105540279,(((n374:0.010810327016389619,n327:0.0027874754823854746):0.00000100000050002909,(((n178:0.005785303008169295,n308:0.003637890041328466):0.004176632638332709,(n106:0.005081762588871499,(n339:0.009171620636586532,n57:0.0022271040740157763):0.0005470034760532768):0.00000100000050002909):0.0010979198280353494,((n295:0.0017203746459416897,n300:0.001109797158697264):0.0011080293065475534,n329:0.0038859728430700887):0.005537492331860049):0.00000100000050002909):0.00000100000050002909,(((n401:0.002193458483212261,n1:0.011377216004646173):0.001671951229807355,n121:0.00110127827041994):0.00000100000050002909,(((n271:0.005140154193632845,(n208:0.004528698499061165,(((n235:0.00000100000050002909,n347:0.002614855502549102):0.00000100000050002909,(n322:0.001436739284733231,n216:0.00000100000050002909):0.0007021549398119849):0.00000100000050002909,n81:0.0040405715537618):0.00008272317141786519):0.001205755781184414):0.0004290059767444999,(n92:0.00825850266855192,n275:0.003919840064958709):0.0030674478922239137):0.0013032228474405233,n296:0.009785263661753054):0.002298594146084906):0.0005012163482014516):0.00000100000050002909):0.0009712785575368346,(n59:0.00000100000050002909,n461:0.005579254928552017):0.006638553991065413):0.00000100000050002909,(n299:0.009115106395392232,(((n378:0.001861836588798431,n91:0.00000100000050002909):0.008607243439982466,n343:0.0030688872766794347):0.0020673664264203454,((n181:0.0017680624230366389,(n107:0.00000100000050002909,n386:0.00000100000050002909):0.0019321983191081123):0.00000100000050002909,n90:0.0017364412097220945):0.0019576628280687626):0.001974871280709823):0.000545951472186042):0.001059100250870353,n346:0.007690793556015707):0.0006905443965078826):0.00039196559661305175):0.00018898599940007403):0.0001920846120959325,((((((n462:0.004786896690285148,(((n480:0.002775539047386999,n287:0.0082753438781502):0.0018950663240863083,(n403:0.002218160619338801,n320:0.0022816817536430896):0.004194041972620445):0.00000100000050002909,n166:0.011273549902169836):0.000682991519112372):0.00027462826422835714,((((n335:0.007932840800731327,n55:0.0061130786692730355):0.00045131331566927946,(((((n48:0.000608003646414314,n202:0.0005066113164437693):0.0048004206670341845,((n41:0.002663846403067146,(n390:0.0033582886326382904,n263:0.0006443341094148171):0.004970873168565813):0.004735858019776524,((n150:0.0011103282915437627,n63:0.00000100000050002909):0.0016408172150322964,(n356:0.003421228823292608,(n321:0.001090484802779668,n158:0.0033868330904090866):0.0005830427437546578):0.002340143453112249):0.00000100000050002909):0.0024820087636463896):0.001054207334113841,(n5:0.021470577280536515,n372:0.01308380595083892):0.00001627341727853318):0.00000100000050002909,((n469:0.014433857707313001,n355:0.00000100000050002909):0.0016448643616606645,((n39:0.008583582094573263,((((((n262:0.00000100000050002909,(n338:0.00000100000050002909,n133:0.00000100000050002909):0.0005497151550704525):0.0005599515644490833,n125:0.0011342779800547398):0.002254741433219388,(n71:0.005654328845112893,n142:0.0005529893243040133):0.00000100000050002909):0.0005599561201357669,((n170:0.0016591575659948249,n217:0.00000100000050002909):0.0005485803409794301,n361:0.00000100000050002909):0.001140430290905308):0.000570923077571727,n7:0.0009663514577157051):0.00000100000050002909,(((n229:0.0011151066176680207,(n214:0.0035514991691818834,n136:0.0011676562082660361):0.0005630980086869426):0.0017356582546490993,n175:0.0025079734334645404):0.00000100000050002909,(n43:0.00528204689873785,(n144:0.0011347506122172735,n396:0.0008357755345041464):0.004342182758811114):0.00048571824423886416):0.001161051569698117):0.00000100000050002909):0.00000100000050002909,(n380:0.00000100000050002909,n218:0.0011931063370853394):0.0022249418986646473):0.0013229888378276026):0.0013095728023975134):0.0008763849027260435,(n226:0.005500970615821841,n291:0.011986145560516383):0.0007800583565074774):0.0004359837287231827):0.0013265449962369517,(((n336:0.0059302659400744815,n313:0.001122368829020474):0.004033932808522133,(((((n247:0.00000100000050002909,n307:0.00000100000050002909):0.0010507300390894918,(n108:0.001853456062330782,n96:0.00000100000050002909):0.00293107392460127):0.0002772514493951866,((n415:0.00000100000050002909,n85:0.0016064305399580336):0.0006424001217934901,((n471:0.0036600381751351056,n19:0.0031263198390088097):0.0017160554150808338,(n254:0.0022441032487829256,((n163:0.0016727425071571729,(n113:0.00000100000050002909,n192:0.00000100000050002909):0.00000100000050002909):0.0011147534030030437,n382:0.0016967994405187464):0.0011156085787812138):0.00000100000050002909):0.0003108690846495712):0.0005806258490113192):0.0005626415134094643,((n444:0.001168154019779526,(n194:0.005284122465856093,n351:0.0023917040323533797):0.00000100000050002909):0.00000100000050002909,n326:0.0011292420704296048):0.00000100000050002909):0.00028079116726886745,(n301:0.0043765946511503005,(n94:0.0016898830588505619,n190:0.0033301079483435917):0.00000100000050002909):0.00000100000050002909):0.0014411059277783774):0.0023455619737490193,((n366:0.007172324594685618,(n44:0.007180678085190145,(((n236:0.008124029906493913,(n186:0.0012189661104487427,n110:0.0016707548404477869):0.00000100000050002909):0.0039747348144621875,(n349:0.007234660930281037,(n467:0.00000100000050002909,n383:0.00000100000050002909):0.002796585582203408):0.00044872889029169867):0.001481229028044099,n83:0.004629235941210408):0.002226979932534412):0.0014128539383893442):0.00000100000050002909,(n305:0.011668405991133725,(n134:0.004665931028369685,((n280:0.0012776352657833988,((n182:0.005881965711733324,(n111:0.0018263103733899733,n359:0.0005482685025126734):0.00000100000050002909):0.00458258298731344,(((n464:0.0004287379336131167,(n168:0.012715437567157576,n317:0.0022035185863537093):0.0014953609314485845):0.00016034293184870974,((((n284:0.0036765780948361205,(n231:0.00000100000050002909,(n70:0.00000100000050002909,n135:0.00000100000050002909):0.00000100000050002909):0.00694722803402837):0.0008300657553221266,((n228:0.0026391286423685504,(n212:0.0008258246637285303,(n119:0.00000100000050002909,n115:0.00000100000050002909):0.00000100000050002909):0.00041218793179577395):0.00000100000050002909,(n46:0.0011200600115266045,n112:0.00000100000050002909):0.0022473852814568172):0.0008265628823647379):0.000924115247709548,n153:0.0035374611425975588):0.00004006321700202822,n476:0.0017314508546148564):0.00032078251624400634):0.00000100000050002909,(n34:0.00000100000050002909,(n398:0.00000100000050002909,n424:0.00000100000050002909):0.00000100000050002909):0.006387276140460202):0.0017461942302241474):0.00000100000050002909):0.0009746218246853032,((n445:0.004741679424480701,n443:0.002922545863902777):0.00000100000050002909,n128:0.0011484611589714269):0.0015641655113712712):0.001159103911767645):0.0003976780463053726):0.0006528475394387169):0.00000100000050002909):0.0006557571718794066):0.0005007575721199158,((((n93:0.0016642391200015808,n418:0.006071755989027004):0.002467402343759298,(n103:0.001224687096858097,n137:0.00000100000050002909):0.0051956293371386054):0.002744173170990974,((n298:0.004976258060610807,(n220:0.0017771335337534203,(n392:0.002760464023276043,n15:0.003527045934524002):0.002956447806397028):0.0009951442701466634):0.0003926787847761255,((n152:0.006564658917894757,((n102:0.00044901628313010145,n109:0.0005493063888143345):0.0002917984240335735,n446:0.005310415431229691):0.005344643772191602):0.0011274945261579492,(n369:0.00000100000050002909,(n185:0.00000100000050002909,(n414:0.001158686824727717,n267:0.001140608966283106):0.0010495984040006176):0.001482812287071366):0.0045989561320185345):0.0010157324833863538):0.0015625159709548924):0.00039208984759112894,((n311:0.007047929134116161,((((n36:0.001130930822298858,n367:0.00000100000050002909):0.00000200000100005818,(n475:0.00123213501020023,(n472:0.0007386168646421984,(n197:0.005514434363055346,((n157:0.0005965187616287222,n286:0.00000100000050002909):0.0011189853597192321,n337:0.0005543840417835993):0.00000100000050002909):0.00000100000050002909):0.0005035625046029146):0.0005040006211895722):0.0007624907885060973,((n130:0.007841232690571725,n332:0.00518881603890685):0.0028870257076991975,((n0:0.00031435618901821114,n289:0.000674762871938823):0.000622482833827589,n360:0.0011547193071510028):0.0006291389645210831):0.0005190613105340658):0.00000100000050002909,n436:0.0012202030052207752):0.000664717545492721):0.0020636714128202693,(((n10:0.0046230959471762175,(n416:0.001277896218639513,n56:0.003959406871559923):0.0032669132172665847):0.0010814112921489591,n174:0.008161391251694471):0.00000100000050002909,(((n140:0.0014736081577254364,n250:0.0004889915253910196):0.0003312568510242296,(n64:0.02098160187358556,n100:0.0008101023789759817):0.0007387138564188152):0.002325048757670236,n357:0.006178775954354275):0.0020213919116938957):0.0023773902669295176):0.001594073436419419):0.00000100000050002909):0.00000100000050002909):0.0008439822194599421,(n481:0.005074359312035304,(n455:0.00646600420615861,(n23:0.008003209808167685,n117:0.0000577280354261843):0.0010210979738681627):0.008284067907823994):0.0017372049488931529):0.00000547692339245949,(((n251:0.005055296077645713,n95:0.0070789653747441944):0.0017499168665966386,((n183:0.0005448383636848754,((n99:0.0010890701886006077,n200:0.0011679644011841908):0.00000100000050002909,(n442:0.004770455835821468,(n98:0.010258625912938833,(n285:0.005752152040480617,n245:0.00000100000050002909):0.001064299008678315):0.005279735894161823):0.0027857858730555626):0.00042090187907830657):0.00211103794655583,((n270:0.0005390604997370893,n274:0.0013055717788689359):0.00000100000050002909,n297:0.0022216218581059327):0.0012622568611625315):0.0012705753475072562):0.000314771319140727,((((((n37:0.0033581901183865654,n54:0.0011096086237204913):0.0016433663791503603,(n399:0.0006231719438725884,n120:0.0022508825611247544):0.0033383776136261725):0.00000100000050002909,n177:0.012511547877137316):0.00000100000050002909,n188:0.00000100000050002909):0.0034294652833063636,(n334:0.0006074789928698519,n460:0.0011709388228079234):0.0042027223838408505):0.0005776837924299957,((n127:0.012016005928206397,(n204:0.0010944711158588616,n206:0.0017437777619181724):0.006563353707233816):0.0029478730050248626,(n88:0.009479335554016087,(n451:0.006401729007825425,(((n138:0.001132255653602101,n358:0.0007793054493929467):0.0015458445139625362,((n69:0.00000100000050002909,n75:0.00000100000050002909):0.0026412407713808364,(n199:0.00000100000050002909,n187:0.0008372864730733655):0.004790194618657354):0.0008765051205024672):0.00030111880106092155,(n155:0.005660643883786209,(n9:0.008622252907836652,n52:0.003308769836295583):0.0034720269566521833):0.0007106275635347211):0.0017617926323179808):0.0009114917297020678):0.0008650888220096964):0.0008607613044678232):0.0015136352890883986):0.00000100000050002909):0.00000100000050002909,((((((n145:0.0011234867843861948,n388:0.004909043562153588):0.0071283511150252036,((((n209:0.008756556405919848,n50:0.008305548798889065):0.00000100000050002909,(n89:0.008974651097082995,(n302:0.0038762031357624568,(n184:0.003883552478998883,(n20:0.00245030980701743,n76:0.00000100000050002909):0.004926838378066831):0.0102179947474419):0.0016215583364013798):0.0010373893821534388):0.00000100000050002909,(n238:0.003307774792823973,n255:0.00000100000050002909):0.0038172057127734437):0.00000100000050002909,(n237:0.00532685013825872,((n189:0.007949345824589133,n450:0.00853499560465489):0.0010732781361257786,n345:0.016467366682721255):0.0010924757654977454):0.0005435011210800666):0.0005703151428495369):0.00000100000050002909,(((((((n160:0.011147472826277387,n364:0.006403766713677764):0.0009404696108475902,(n340:0.0005398336541642229,(n434:0.0005374087515504932,n14:0.00000100000050002909):0.0021553836875069544):0.007119374360185818):0.00000100000050002909,(n73:0.010421007750826581,(n441:0.008344506590278283,n141:0.006425067629132934):0.0025216845330024657):0.0006694109300074842):0.0010744947370898428,n273:0.008901675262879518):0.00000100000050002909,n26:0.01012265816455677):0.00000100000050002909,((n438:0.008362035772828784,n224:0.001856498952696397):0.0026704924634922446,((n32:0.001503215203346259,n211:0.000950670456486019):0.00020799801214043908,(((n377:0.0022689115354547493,n468:0.002012599851127104):0.002331196699176571,n210:0.004985326750330997):0.00033585904808172825,(n78:0.0022208963146491457,(n440:0.002493205208886753,((n306:0.003346926586185284,(n405:0.0028921867077316542,n258:0.00000100000050002909):0.001117728427078462):0.00000100000050002909,n425:0.008350973395169695):0.0016490861174655608):0.0006967282990868118):0.00000100000050002909):0.00000100000050002909):0.0011471394850536387):0.0006055665182034765):0.001210900540439599,(n79:0.003822465464426693,n381:0.012563789442695658):0.0014828118284446882):0.00000100000050002909):0.0025173023440906656,n207:0.006038875726685008):0.0008320894096442921,(((((((n266:0.00000100000050002909,n265:0.0004587718510822866):0.00000100000050002909,(n260:0.003829811977883394,((n201:0.004165241756627043,n154:0.0051663174873805015):0.00000100000050002909,n316:0.002929939092158596):0.0022131763118092224):0.0008188148816851274):0.0016462041164644436,n353:0.004818793079655247):0.00046730465968780773,((n281:0.010252691446465323,(n423:0.0005480191005093753,(((n368:0.0022323548034406974,n27:0.0005513448970921721):0.00000100000050002909,n25:0.0022152325886572125):0.0005495757416314732,n379:0.002874314413723423):0.001102925492365439):0.004454602824663935):0.0008322697981759801,((((((n309:0.006551232378546943,n384:0.002512906798899329):0.0020286350448675355,n230:0.0044439806251936895):0.00000100000050002909,(n241:0.003835050814147668,((n161:0.010658588352407457,n243:0.0029439386377130275):0.004533262371892039,n261:0.0012363459012974265):0.00000100000050002909):0.0016961486973511594):0.00000100000050002909,((n344:0.0038862850849001257,n276:0.003801135450381543):0.0018946276899558976,((n252:0.006708204348029306,n447:0.006250702721219018):0.00108368443251002,n324:0.003871176583589176):0.0005380466138017937):0.001418455879194595):0.0006185187514624376,n162:0.007897567489784072):0.00000100000050002909,(((n387:0.004391794247374467,(n348:0.0047021373758327975,(n304:0.0011291116635681554,n439:0.004526492889301867):0.002218939365673193):0.00000100000050002909):0.0005460144149568191,n45:0.008708224114167678):0.00000100000050002909,((((n2:0.002772194122474677,(n246:0.004037167207191549,n66:0.001634741136519319):0.0007124880882475395):0.0005464071443993255,n122:0.007146671159719581):0.00000100000050002909,(n417:0.00275950277248515,n3:0.006256025582969879):0.00000100000050002909):0.00000100000050002909,((n323:0.003038017708244567,n310:0.00000100000050002909):0.00000100000050002909,(n391:0.00870241070246,n171:0.004621830350342937):0.0005423517472778489):0.002255684776479946):0.00000100000050002909):0.00046428933029196923):0.0005148417638578368):0.00000100000050002909):0.0017065264158935892,(n328:0.009438890351759743,(n239:0.006462901548004189,n459:0.005506752418646818):0.00000100000050002909):0.001775034773850414):0.00000100000050002909,((n240:0.0017158820395837217,n314:0.003132670309719388):0.00000100000050002909,(n8:0.005571780839435661,((n225:0.003628416484663302,n60:0.0009435143130853391):0.007207038235884839,(n244:0.005029221202410017,n269:0.006277323467136353):0.00620044765862299):0.0011466978351731166):0.00000100000050002909):0.00023936000932286714):0.00000100000050002909,((n259:0.005946429969485893,n421:0.0050363317212753925):0.0007666197527512272,n318:0.009617424204301814):0.00000100000050002909):0.00000100000050002909):0.00000100000050002909,(n389:0.004642796679872636,(n151:0.006663883257767565,n373:0.0035195705032771874):0.0014807093742791838):0.0015423698908684335):0.0005057451786699122):0.0004083224602650035,((((n16:0.009944726970067036,(n68:0.0022181932813190135,(n354:0.007179938656859534,((n118:0.0015757829450927898,(n465:0.00000100000050002909,n477:0.00000100000050002909):0.00000100000050002909):0.001047229842540634,n116:0.0016388030543057334):0.0005083024922841229):0.002601000093158786):0.0015844103246550798):0.0005145910877280997,((n303:0.005402686261664513,n458:0.0028352670768129863):0.001114177797380685,(n61:0.003826661582536485,((((n474:0.0019646989520424223,n4:0.0032988683162934007):0.0019047862593366382,(((n333:0.001312670423029087,(n294:0.00000100000050002909,n404:0.000569935987178857):0.0019291316871672423):0.00000100000050002909,(n13:0.0005442830357956131,(((n457:0.0006045658298962428,(n350:0.00000100000050002909,n470:0.00000100000050002909):0.0016265988959921283):0.00000100000050002909,n363:0.0004178123527190449):0.00000100000050002909,(n124:0.000574064570819262,n123:0.002170954679992223):0.0010844957142203146):0.0013828021546607647):0.0004579843079132188):0.0009458067828004679,(n24:0.0011029362046356692,n47:0.0006889352133311164):0.0020712727678105945):0.00091141302728675):0.00022870427664338985,((((n233:0.008579507578365628,n466:0.001953087875442793):0.002042202613960575,n376:0.0049823646977856725):0.0002937194360632691,n159:0.011185153282499829):0.0005914849070165738,((((n482:0.0010906771216967202,n148:0.003288936361657792):0.00000100000050002909,n176:0.00000100000050002909):0.0011650813955394923,n412:0.004434345027864646):0.0007671290278877017,n232:0.004331773587073092):0.0012717957136452798):0.0016255271134725453):0.0005516181515880848,n249:0.005966415643739699):0.000547361032926993):0.00000100000050002909):0.0005311534890565145):0.0002781599250406169,(n341:0.007574928571816166,(n223:0.009492331021041583,n147:0.002837515789912636):0.0009223025196234432):0.0009516743255218563):0.00000100000050002909,((n6:0.00000100000050002909,(n29:0.00000100000050002909,n167:0.00000200000100005818):0.005734998487863244):0.00000100000050002909,n193:0.00000100000050002909):0.006315904308837759):0.0009316571547465665):0.00037927384458370805):0.00000100000050002909):0.00000100000050002909):0.001140621160043757):0.0001874208819247403):0.0031543392635397134):0.0014689338800601844):0.00045227090426716696):0.0021997319310245534,n393:0.01137845332871731):0.00025750835590702026):0.03818008427032988,n65:0.08050335976496965):0.0099688433307087,n114:0.04450920129039438):0.05610151658488023;
	TREE 'Imported tree 6++' = (n114:0.056863765942545254,(n65:0.08286678786964677,(((((n430:0.015318995451162701,n74:0.011755073759798833):0.002703980045721409,n143:0.014749133631301894):0.0019508037195669343,(n279:0.01501648222551094,((n463:0.007394255421580231,n264:0.006316916571000488):0.005299965925359393,n385:0.007985461926880173):0.003672851734219976):0.0019437806289629809):0.0012559911765205193,(n86:0.020431178005745527,(n431:0.008922099474836654,n253:0.00960821836503885):0.00231168832654951):0.0057919483285411725):0.000615427427175386,((n406:0.022486944626327575,((n33:0.019067245341849334,((n448:0.00786060029693224,((((n62:0.00490150962594226,(n478:0.009567739495151516,((n132:0.01020081858962607,n198:0.004532733732627794):0.0026411579845301548,((((n479:0.007178759004830858,n426:0.00576200557095316):0.0026313610952117374,((n156:0.0042620899943423335,n394:0.0012588765798557018):0.004980803966976019,(n221:0.0005960169853061637,(n234:0.00000100000050002909,n342:0.00000100000050002909):0.0013881194842716906):0.006354861905709289):0.0006326229608332748):0.0012282970337113262,((((n352:0.0025652420441017567,n419:0.005330902850029458):0.0010460837092686741,((n126:0.0034353931256577517,n173:0.0016932988189220072):0.0031034361750732287,(((n131:0.002709678052913237,n435:0.003590105319416169):0.0013320977038078145,(n28:0.013518695031776422,n452:0.00298515101653933):0.00040613931030541555):0.00000100000050002909,((n97:0.0034026962621081743,n293:0.0036830242945777624):0.00000100000050002909,n11:0.012721797471263193):0.0011223498584816056):0.00046618794542005606):0.00000100000050002909):0.00000100000050002909,((n164:0.00000100000050002909,n365:0.00000100000050002909):0.001657224503872578,(n375:0.002247090935702428,(n371:0.001164686368739906,n30:0.006656249562084912):0.0016868094676927463):0.0015929915266339873):0.0011913053677780718):0.0007552957316730492,(n149:0.0050337055863805494,n12:0.007405958603022752):0.0010483354296639549):0.00000100000050002909):0.0013049774295983872,(n203:0.00879670717952752,n427:0.0032008569341817478):0.00805908054081795):0.00029317391043903393):0.00000100000050002909):0.0008633220283618333):0.0014495776065746105,((((n165:0.0024147892096909405,n49:0.0020654225808558655):0.0022357523276808197,(((((n362:0.005522574304631008,(n410:0.00000100000050002909,n408:0.00000100000050002909):0.002174546555084283):0.0019125557848995783,n104:0.0041710265236044545):0.00000100000050002909,(n407:0.004030543285322345,n22:0.00497905397290304):0.00042342103325887915):0.0003183133958529436,((n312:0.0015498405609646842,((n409:0.00000100000050002909,n53:0.0040504699459206935):0.002451556463730347,n219:0.004831199542969521):0.00000100000050002909):0.0015490110847197478,(((n325:0.005697492969442157,n370:0.0010001626149359303):0.001656005512162901,(n180:0.00000100000050002909,n191:0.0068668163879131335):0.001579702506857421):0.00030055636144832537,(n40:0.0006002323749995579,n282:0.001590188765663836):0.0019032051565292982):0.00000100000050002909):0.00024013094088126398):0.001255903785611105,(n256:0.0036255848092854063,n205:0.00000100000050002909):0.0012527389709416803):0.0005021406811030609):0.00000100000050002909,n268:0.007051052034111375):0.00258657134145772,(n272:0.005155301198883405,((n196:0.009428899404254606,(n437:0.00655207640458842,n42:0.001354197523741213):0.0012191712174631926):0.0016527063254863992,n395:0.00771754871729156):0.00000100000050002909):0.003246469396293723):0.002024220092909223):0.00041265466976543006,n227:0.0061231125207918055):0.0008862974488862041,((((n169:0.006366403726965642,n172:0.007980170732207215):0.007511191351642528,n283:0.004674157864538701):0.00043049144981358115,(((((((((n9:0.011181954086604603,n52:0.00491689076089773):0.002897679951628794,n155:0.0121689407951621):0.00022929891162121746,((n69:0.0009645381022596681,n75:0.00000100000050002909):0.0037854076458296356,((n199:0.0032710308869082156,n187:0.002069049555976568):0.004582201989793419,(n358:0.00244348945562782,n138:0.00274037360922579):0.000867174188592684):0.00000100000050002909):0.0006471647989850654):0.0011482339938957199,n451:0.011521749086976646):0.0024976103468505604,n88:0.010841895525394224):0.0020053320952327556,(n305:0.01462682017566039,(n460:0.0015962357596101704,n334:0.0006415132415458864):0.00450491414766148):0.001520615976459551):0.0018056419843073875,(n177:0.011761190559105371,((n120:0.0011957846070528358,n399:0.0006744069347859594):0.005357066736948169,(n188:0.001169383201813164,(n37:0.005944383015507587,n54:0.0006434613765939022):0.0011597056053550194):0.0015153749517067903):0.0010774427068144684):0.0022565061838381003):0.0008047554193544926,((n259:0.009381229093831777,(n207:0.00959035103193579,(((n421:0.004920178531627959,(n55:0.010325842239146272,n335:0.00767452433333729):0.002343410412294686):0.00037641010430597297,(n353:0.004957107031708067,((n429:0.0007150246563289499,n242:0.00000200000100005818):0.005101856688563172,(n60:0.003440306604509266,n225:0.007068543732245292):0.008858231303303076):0.00048541370438153224):0.0013016378304912966):0.00000100000050002909,n328:0.00861950818331668):0.00019906508626269388):0.00020159066426665394):0.000608729766503344,(((n95:0.010721103344050556,n251:0.008370678990691174):0.0034147811955454127,((n297:0.005170123976837364,(n270:0.0008015419424537633,n274:0.0011575076777961839):0.0045228101277011035):0.001780292315131927,(n183:0.0011682751450408134,((n99:0.00000100000050002909,n200:0.0031740886936292814):0.001164509661459526,((n98:0.006157368772074255,(n245:0.0012825385894386543,n285:0.009156602897924075):0.00000100000050002909):0.008913228591158654,n442:0.0036063266917188935):0.000979986604359115):0.00000100000050002909):0.0019453038347583124):0.0011089757820326293):0.0011179163392359525,((((n314:0.001848240628780458,(n240:0.0049333250137210665,n459:0.004203439109655072):0.00000100000050002909):0.00000100000050002909,(((n166:0.019823395016429234,((n320:0.004912450127869336,n403:0.0030295573528235933):0.00356858157494715,(n480:0.004813923555916556,n287:0.012904377034996316):0.002968496172583904):0.00000100000050002909):0.0011470961397699972,n8:0.0035672876139930822):0.0011432493551959805,((n244:0.0022723524539361726,n269:0.009336167383805235):0.0037577167740220183,n469:0.012271779305253569):0.0010467711218486613):0.00000100000050002909):0.0012363803040038445,(((n281:0.010733208750649793,(n423:0.001804839304877456,((n379:0.003033928505163911,(n368:0.0017946999444802296,n27:0.00000100000050002909):0.0005859980457144918):0.0011659103709638322,n25:0.004153184298036069):0.00000100000050002909):0.00235977968894335):0.0018229919773203771,(((n316:0.005269419363877897,(n201:0.003978727083073036,((n265:0.0004884549807089027,n266:0.00000100000050002909):0.0006144433439224358,n260:0.007136832996649314):0.00000100000050002909):0.00000100000050002909):0.0012670024488634626,n154:0.00424072446351725):0.0040536428991812656,(((((n323:0.00516867022747167,n310:0.0020667701326130927):0.0011104177142492817,(n391:0.0100595422755063,n171:0.006136734865894232):0.002853762485906369):0.002027149996239725,((((n2:0.0023630217047242333,(n66:0.001294156785079818,n246:0.0012403946803041998):0.0017688030667714655):0.0005772906494807566,n3:0.004846387672955191):0.00000100000050002909,(n439:0.005477894646483629,n304:0.002409485869967878):0.0023811143875523675):0.00000100000050002909,((n348:0.01067878131471501,n417:0.0036039683812075104):0.001111939526752792,n387:0.008269705069485815):0.00000100000050002909):0.00000100000050002909):0.0010072260583823217,n122:0.0029031976593661686):0.0006005787803136801,((((n324:0.005357346477947472,(n447:0.003611305265989283,n252:0.008328948768109067):0.0005719287578417355):0.0005826796244829616,(n276:0.0018619230914055061,n344:0.006584567381411119):0.0032867228808076327):0.00000100000050002909,n384:0.0015222052324015138):0.0019625714722085294,(((n162:0.01108828572948903,(n230:0.007810169382068745,n462:0.004804050196240697):0.00000100000050002909):0.00000100000050002909,(n241:0.005834674913749082,(n261:0.0013437752656430741,(n161:0.016324169735061764,n243:0.002771478204884055):0.0013830320280227599):0.00000100000050002909):0.0023639858579667184):0.0003028140285723096,n309:0.00779302176621464):0.00000100000050002909):0.0009286967009631269):0.00000100000050002909):0.0006423181775303155):0.0012212660253277108,n318:0.017911046335226215):0.00000100000050002909):0.0009215761006473051,((((n481:0.009130226532524162,(n455:0.009000455478649938,(n117:0.002998872772091047,n23:0.012673368092904782):0.002058309238996203):0.0030453973724267453):0.003175969087503688,((((n174:0.010236330532044962,((n416:0.004787787982862946,n56:0.002823983065183923):0.005652625157736783,(((n140:0.0036346429433708914,n250:0.002578103184107476):0.001032531651143085,(n64:0.025755897747762192,n100:0.0009308125287665064):0.00032025651871217797):0.0005933136316570452,n357:0.008767457982688569):0.0010502308935805029):0.00000100000050002909):0.0011596595998853365,n10:0.006120189677569432):0.002479183038302355,(((n103:0.00000100000050002909,n137:0.00000100000050002909):0.008210384882157572,(n93:0.0005988819571367472,n418:0.003089975022532185):0.0026255122498720852):0.0014110915396379168,(((n475:0.0039062376167913085,(n367:0.00000100000050002909,n36:0.0006039579911507961):0.0006311562885652912):0.0026625442303723477,(((n289:0.0038890431628615003,n0:0.0011610045792373362):0.00028827267385650473,(n360:0.003082018933598274,(n130:0.009418549435670895,n332:0.003252577484548169):0.001359795903079571):0.00000100000050002909):0.0005090613123902356,(n436:0.003067152885276413,(((n286:0.0018227983773683107,n157:0.0006379506868468983):0.0005911569365580076,n472:0.0002983759295549109):0.0002934815946539634,(n337:0.0005905286901604708,n197:0.003518235588988879):0.00000100000050002909):0.0026004871678550444):0.000547060981125218):0.0016638618982414176):0.0009904073733421643,n311:0.010618344635512263):0.0015473723028557786):0.0020612104662433594):0.0013392635422229532,((n298:0.008214429292654262,((n15:0.005615775486446973,(n392:0.00387377661997865,n220:0.0029031791419941336):0.0007772669189664779):0.001460052057978387,(n369:0.00000100000050002909,(n185:0.00000100000050002909,(n267:0.00000100000050002909,n414:0.002734528614382167):0.0008622189129712147):0.0036030395393651755):0.005339344022829972):0.0006902728629901426):0.0009455815904292182,(n152:0.012027121768885693,(n109:0.0011764694657730704,(n446:0.006497320842550446,n102:0.00000100000050002909):0.00000100000050002909):0.005933065437298892):0.001975253254967901):0.002721292201887648):0.0006090926610074326):0.00000100000050002909,(((n226:0.007662989277772142,n291:0.014738619501199958):0.0013905828224227896,(((((n150:0.0012087942219267604,n63:0.00000100000050002909):0.003523297913405503,((n41:0.0015083097584042567,(n390:0.003662433272229655,n263:0.001803832470688015):0.002964006276435099):0.004962679693111452,((n321:0.0015813940210122417,n158:0.00000100000050002909):0.002947677233678497,n356:0.002484741482636507):0.0026348022505672743):0.00000100000050002909):0.002970655912504115,(n355:0.005190340618932267,n372:0.015392657789808306):0.0018920205362848485):0.00000100000050002909,(((n39:0.00805470435110015,((n142:0.0030143819870243,n71:0.0060459587390989345):0.0005349849793800958,(((n338:0.00000100000050002909,n133:0.00000100000050002909):0.0011809402602465792,n262:0.001253419027275223):0.004391377808165559,n125:0.001822323037748739):0.00000100000050002909):0.0012464975528354307):0.00000100000050002909,(((n43:0.009446516372687149,(((n214:0.0021022451105758948,n175:0.0027780126877448735):0.0020782685328050486,n136:0.0037215127634235502):0.001760706857099506,n229:0.0029706326299106783):0.0011778068009146664):0.0023747847889481937,(n5:0.016432098317486554,((n170:0.0035977509018437085,n217:0.0005783735817416452):0.0017885543893416734,n361:0.00000100000050002909):0.00000100000050002909):0.002487323645365266):0.00000100000050002909,((n396:0.0029067842951001534,n144:0.0005916486204032928):0.005082088686918023,(n380:0.0006074465151146615,n218:0.0012643631441582382):0.004809725573846106):0.0005844543142579413):0.00000100000050002909):0.00000100000050002909,n7:0.00367188111550919):0.0021334239549965607):0.00000100000050002909,(n48:0.0006851989686862835,n202:0.0015203529545289116):0.00423356317266817):0.002020739141537516):0.0019091044953785422,(((n313:0.0022629861018551413,n336:0.007523367605826503):0.007484393289612686,((((n190:0.0037434970076329127,n94:0.000597260246180358):0.00000100000050002909,(n326:0.001199977788958988,((n194:0.0031708559673390047,n351:0.0025694812820555397):0.00000100000050002909,(n444:0.00000100000050002909,(((n415:0.00000100000050002909,n85:0.00110160254823215):0.0033098779221244204,(n254:0.0017915326849153592,(n307:0.00000100000050002909,n247:0.0008478251236252674):0.001993112228314992):0.00000100000050002909):0.00000100000050002909,((n163:0.003591639515704156,(n192:0.00000100000050002909,n113:0.0017899165290385542):0.0006128549725251479):0.0018403338982889616,n382:0.005455850278427491):0.0024613318440669775):0.00150103127049799):0.00000100000050002909):0.00000100000050002909):0.0007490239182387041):0.00000100000050002909,n301:0.006619607246887115):0.0006615728031681842,((n19:0.004856735539236172,n471:0.005635576121889473):0.001120402996597343,(n96:0.00000100000050002909,n108:0.0007381170529115499):0.0033507791118577196):0.0005386996585635759):0.0005600780031307181):0.0025837406345525543,(((n349:0.00650558510558155,((n383:0.00000100000050002909,n467:0.001209176655696183):0.0041449977874491685,(n186:0.0013132377364777983,(n236:0.009385506842571452,n110:0.0023497115971567893):0.0023583071507374655):0.002398754867319092):0.00000100000050002909):0.004717625495627444,n83:0.004166801573865504):0.004172990706062745,((n366:0.004006876924582803,n134:0.0041726142068931145):0.0016509404146672682,(n44:0.011411504243978693,(((n204:0.00000100000050002909,n206:0.00000100000050002909):0.003577854962958458,n127:0.013969619010175984):0.0016968872845563251,(n168:0.011241224434309449,(((n464:0.001275366652926975,n317:0.00477271362257701):0.001278248555727772,((n153:0.0044126576635376375,(n476:0.0012578076992449854,(((n212:0.000531178219124718,((n119:0.00000100000050002909,n228:0.00791221192450785):0.000601357263336922,n115:0.00000100000050002909):0.00000100000050002909):0.0005295011825367095,(n46:0.0005953850518917006,n112:0.00000100000050002909):0.0005968747395522316):0.0005340643184540398,(((n231:0.00000100000050002909,n70:0.00000100000050002909):0.00000100000050002909,n135:0.00000100000050002909):0.006599996326840881,n284:0.0021772844026718796):0.0010037973955948762):0.0022009836170578554):0.00000100000050002909):0.00000100000050002909,((n424:0.00000100000050002909,n398:0.00000100000050002909):0.00000100000050002909,n34:0.00000100000050002909):0.006217432469210675):0.00000100000050002909):0.00031369906863950274,(n280:0.0025152846616745867,(((n443:0.0012234804851901503,n445:0.0019524535629575064):0.0005008367475317465,n128:0.005299111897558896):0.008890999064364863,((n111:0.0020654168214156304,n182:0.0061964550925390615):0.00000100000050002909,n359:0.0005844833741892024):0.0031333947552821305):0.0008926735473743869):0.00000100000050002909):0.00042016611629860527):0.0006181571732737368):0.0008003582043541446):0.0014616923225336074):0.00000100000050002909):0.0006107780559851697):0.0014672585751457864):0.0006800387476645498):0.00035256596893778943,((n248:0.0032293325919263197,n129:0.0021385957250812816):0.006196174976316604,(n18:0.0011612391236397342,n35:0.0028509103317917836):0.002765093007434334):0.0010376906384018227):0.00000100000050002909):0.0012753244507770455):0.00000100000050002909):0.00000100000050002909):0.00000100000050002909,(((n73:0.003374269068407542,(n79:0.004969742998154503,(n381:0.015602718458848275,n26:0.014166424157072473):0.00000100000050002909):0.0013877826130372418):0.00133167880110942,(((((((n210:0.003674636760880201,(n377:0.006200749961314519,n468:0.001984679592711695):0.0033263137593616573):0.00023847122672572004,(n425:0.006374321098662157,(n258:0.00000100000050002909,(n306:0.0029480368832040882,n405:0.00000100000050002909):0.00000100000050002909):0.00233721502876777):0.005293644776841959):0.00000100000050002909,((n32:0.0023866032736087396,n211:0.000970208399288323):0.0013535292152359174,(n440:0.003946733451907358,n78:0.0006164939886488816):0.0007014945927655867):0.00021656431156912272):0.0013218977006646364,((n160:0.012722483336570533,(n340:0.0005764989437387502,(n14:0.00000100000050002909,n434:0.002302683916063033):0.0011508728801929247):0.007967411910034966):0.0008874830881439473,(n438:0.006476790577627209,n224:0.003337181868796923):0.0038565876319158437):0.001183061393211293):0.00000100000050002909,(n441:0.007018575345205754,n273:0.01195279303744451):0.00000100000050002909):0.00000100000050002909,(n364:0.006161492291324955,(n145:0.0018540413656306944,n388:0.0023114684174197807):0.008303506072250891):0.0029241197842601583):0.0004251065977231337,(((((n238:0.004096589255560699,n255:0.00000100000050002909):0.007035640703012534,n141:0.010712058720690056):0.00000100000050002909,(n237:0.011569591197036912,(n50:0.008171233468740078,n89:0.012181989061263042):0.001639346145697914):0.00031540528609397245):0.0011530100427549741,(n345:0.020266291773249238,n209:0.01255179494003656):0.0028322236011588875):0.0024176000064620854,(n450:0.011088077798094313,n189:0.009473701778703702):0.002601402929780187):0.00000100000050002909):0.00000100000050002909):0.0011406409361953117,(n302:0.003528839816793321,(n184:0.005215047765959341,(n76:0.002635878811160753,n20:0.0033812482523406383):0.003642129140927736):0.017949851116730305):0.0025960947663058766):0.0022742408841431457):0.0006455083550284235):0.0002192837703520582,(((((n222:0.02601760212157372,(n139:0.0040029814683529875,(n195:0.006561322480461133,(n278:0.00000100000050002909,n84:0.00000100000050002909):0.00433200393159439):0.0018134151586846276):0.0019788838828933304):0.001823019197202955,((n315:0.010578184061579569,n80:0.006778765426005018):0.006457437587222422,n288:0.008208135785880291):0.006334093512468635):0.0001968349246279717,(((n453:0.00568343338099561,((n331:0.00000100000050002909,n31:0.00000100000050002909):0.0005902253408274355,((n17:0.005382837619152831,n277:0.0011930056373883088):0.00000100000050002909,n51:0.009480958591881545):0.001646664913486493):0.0005474618640992449):0.00000100000050002909,n292:0.010633970685796969):0.00000100000050002909,((((n402:0.00128457196678197,n77:0.0017269176930604256):0.00713588681101155,(n420:0.005273601830118296,n319:0.0026500469465472734):0.002066731742037482):0.0011828450517247593,(n400:0.011974763871278061,n213:0.005766360916132057):0.00045588715251629867):0.003029979498747051,(n105:0.004870538473013789,(n432:0.0012435518621149448,n67:0.00000100000050002909):0.0010688255254505008):0.0018565483734554553):0.0013499727814851434):0.0013558383021772809):0.00000100000050002909,(((n290:0.0029964942576310755,n215:0.0043889617737903645):0.0029150632202405774,(n456:0.002306732195990508,n411:0.007346765777758374):0.008775874088363002):0.001806863816121644,((((n45:0.021518037476178715,n330:0.009899150964936923):0.00000100000050002909,((n428:0.0014641336400507473,n179:0.0019123643867924615):0.011252796029166495,(n101:0.0064739839073454965,(n38:0.0020314027099812043,n413:0.0030186685757651347):0.00024271492431677887):0.0012521452208374279):0.0012828539562210759):0.0002526842513671957,(n449:0.00674239601025873,(n389:0.009712715889067839,(n373:0.002175354288770845,n151:0.006667037083472228):0.002204568199240437):0.0016864605960255602):0.00000100000050002909):0.0006485961426280413,((n341:0.010670929131759354,(n193:0.00000100000050002909,((n29:0.00000100000050002909,n167:0.00000100000050002909):0.004435944338076195,n6:0.00000100000050002909):0.00000200000100005818):0.007000324657859037):0.0019716866882503055,((((n303:0.009341225038730906,n458:0.005641615696888892):0.0011611569656817106,n376:0.01113548062722143):0.0033234214014696752,n433:0.004202749808258208):0.00000100000050002909,((n147:0.0049279106992445795,(n16:0.008046573617548874,n61:0.0054719742591124235):0.0005414379380433102):0.000532514763552798,(((n159:0.015126015416663441,(((n239:0.007254702595615179,n223:0.009644315327322057):0.00000100000050002909,n233:0.011319100295958978):0.00000100000050002909,n466:0.004889117962534737):0.0008414251475129719):0.00000100000050002909,(n68:0.005939974985024297,(((n477:0.0035338376684916763,n116:0.001188364835688437):0.00000100000050002909,n354:0.01437075490402174):0.0011660346838564158,(n118:0.005705328238246013,n465:0.00000100000050002909):0.0011144136589739157):0.0017162635298171778):0.0011251101079933431):0.0008014310811507819,(((((n148:0.0005732754718889236,(n412:0.007799087015671565,(n176:0.00000200000100005818,n482:0.0017590136593539426):0.00000100000050002909):0.0012368001075764507):0.003703917382163864,((n294:0.00000100000050002909,n404:0.004934582766173186):0.004885733081141474,(n333:0.0014455165154215288,((n24:0.0012914707681603505,n47:0.00000100000050002909):0.003712116997439918,(((n457:0.004418352391751684,((n350:0.00000100000050002909,n470:0.00000100000050002909):0.0023240025787902335,(n124:0.00000100000050002909,n123:0.0005800929112073453):0.0011594157343064308):0.00000100000050002909):0.00000100000050002909,n363:0.0007551644915485063):0.0010865923363527889,n13:0.001172266214330839):0.00000100000050002909):0.0005948156379403231):0.00000100000050002909):0.001105135101867923):0.00000100000050002909,n232:0.006617542290316475):0.0006099817317113878,(n474:0.004304891897246324,n4:0.00578926562476894):0.0034807134961420427):0.0006029529509699883,n249:0.0028942992559729797):0.00019259539271330032):0.0006555898076546366):0.0007819674811284437):0.00000100000050002909):0.0012221667660245376):0.00000100000050002909):0.0005568561974678978):0.00000100000050002909,(((n146:0.0006835472378883738,n82:0.0083002929958449):0.007039711305578999,(n346:0.012647912814977479,((((n308:0.004782352755255235,n178:0.0032925481561708256):0.005442700307190301,((n72:0.006149054274884982,(n58:0.010792209600829354,n473:0.0010030120803234158):0.0016361408087603073):0.0005069601272595626,((((n329:0.0035667920940042046,(n300:0.0017820863086833276,n295:0.0030585017272366957):0.0017875047399076936):0.006501261401292631,(n374:0.008041721006121518,((n401:0.002345304884128977,n1:0.009771551272448147):0.001783980261863895,(((n296:0.010089441034063984,n271:0.00849946680750349):0.00000100000050002909,((((n235:0.00000100000050002909,n208:0.0064805780382170665):0.00000100000050002909,n347:0.000814751287911989):0.00000100000050002909,((n81:0.0018819307049689428,n322:0.0012297099054380711):0.00005788535839794504,n216:0.00000100000050002909):0.0017668917638816793):0.0012642375192645412,(n92:0.008839409297939157,n275:0.008751549128506059):0.0026056100733326203):0.0006926973394478428):0.002963130729007754,((n339:0.012266074063320457,n57:0.0035664580090526694):0.0011672149772545004,n121:0.00000100000050002909):0.0005860617189477256):0.00000100000050002909):0.0007610696674332063):0.0015174590778111049):0.00000100000050002909,n106:0.007318503156420498):0.00000100000050002909,n327:0.008415292306069492):0.00000100000050002909):0.0010145235741565008):0.00039822561608676265,((n59:0.001363865210161432,n461:0.003738863917837915):0.006102742943690752,((n90:0.0026302683119847885,(n181:0.0018695984784713598,(n107:0.0013925138901217289,n386:0.00000100000050002909):0.0024027799779161338):0.00000100000050002909):0.003994140725353914,((n91:0.00000100000050002909,n378:0.0013418537565271765):0.008914781254590607,n343:0.0010453306418752545):0.0031960695440813067):0.0013592891258930532):0.00000100000050002909):0.0000608960532279488,n299:0.006643330259568034):0.0006562086356456623):0.00034325648988751815):0.00000100000050002909,(n397:0.00000100000050002909,n422:0.0009439219103931969):0.004114384542472633):0.0006119594159499525):0.0002382531736757885):0.0008516988789615548):0.0004230527755907245):0.0010827447190098394,n21:0.0060062228092129565):0.004663969441616842):0.0017277904291501953,(n454:0.013908152877154254,(n87:0.013805686539236481,n257:0.011688120564672432):0.005724807752886208):0.0006549301373541981):0.0027168619511981516):0.001402711352216649,n393:0.010937080016896661):0.001420440262119041):0.0367787350005555):0.01253010936016435):0.05538368536473032;
	TREE 'Imported tree 7++' = (n114:0.06134259666145334,(n65:0.08438475476338526,(n393:0.015316382266076903,((((n279:0.013359166743671937,((n463:0.006171277612157791,n264:0.0064724768352450255):0.0039900594216620055,n385:0.0090613184715218):0.004039175647224174):0.0009436631081891053,((n74:0.01106924420650787,n143:0.017384101614670668):0.0026175317955005177,n430:0.020832871852030543):0.0019075303525500735):0.0012360662963812536,(n86:0.021551802506587496,(n431:0.013956515881144478,n253:0.010324647048028473):0.001821394713976697):0.006024800649306778):0.0019372586943202986,(n406:0.020454443235718517,((n33:0.01937578826524538,((((n62:0.007201017540336235,(n132:0.008732441522337731,((n198:0.0040833929074589916,((n149:0.00623449848879624,n12:0.007231309119119025):0.0001672750959881001,(((n479:0.008621108896061151,n426:0.005699486745680919):0.002137495526696326,((n156:0.0024385001286777687,n394:0.0038227775685570173):0.0028587154206275184,(n221:0.0005851202950512682,(n234:0.00000100000050002909,n342:0.00000100000050002909):0.0012838514222800557):0.004529628628999308):0.0008994569128659346):0.0016657485849699883,((n164:0.001950143203303307,n365:0.00000100000050002909):0.0007797203180937467,((n352:0.003050640534414569,n419:0.006483615268819726):0.0014881847775334502,(((n126:0.004038061986340638,n173:0.002544682307738167):0.0011202408576002885,((n28:0.0073519644006530376,n452:0.00444898832833516):0.0004719165070175003,((n97:0.0048032072627523514,n293:0.006126687354239683):0.00000100000050002909,n11:0.008901315750030942):0.001254602796080082):0.0002789545280566203):0.00000100000050002909,((n30:0.0071328694359886705,(n375:0.002218090896458703,n371:0.0013573930309908795):0.0015249225996792893):0.002423739854825503,(n131:0.0019387344377019605,n435:0.0017399652498294217):0.002875977276647682):0.00000100000050002909):0.00000100000050002909):0.0002021447276608241):0.00000100000050002909):0.0002190340305936032):0.0013614239800211682):0.0007254918304903159,(n478:0.009157864702590262,(n203:0.006377445206712084,n427:0.005231891469003394):0.01134387151445814):0.00000100000050002909):0.0006247105082801337):0.0013528368852001418):0.0018665023725929323,(((((n165:0.0013522750707751505,n49:0.0022947275246791615):0.0029233504490927126,(((((n362:0.0059871901279413536,(n410:0.0011931497314346508,n408:0.00000100000050002909):0.0018088259689449243):0.0005850003885072063,n104:0.0031301451668101533):0.00000100000050002909,(n407:0.006721933228211872,n22:0.006228248441160316):0.0009908109060560546):0.00029197059381822177,((n312:0.0006011928912714762,((n409:0.0030212117184557083,n53:0.0010892499677282808):0.00017054039089716588,n219:0.0023283783510289146):0.00000100000050002909):0.001791269132191433,((((n325:0.001605522850419932,(n40:0.0017807575185052958,n282:0.000965393754902295):0.0006430779191695257):0.0005741193097899317,n191:0.0045444862638277595):0.0007365377421664548,n370:0.00000100000050002909):0.00000100000050002909,n180:0.002049055796907931):0.0005048674716074164):0.00000100000050002909):0.0006173616909171431,(n256:0.005515517061704278,n205:0.00000100000050002909):0.0009228006945925933):0.00041415015738691417):0.00000100000050002909,n268:0.002272528627760621):0.002545331468446051,(n272:0.01501820102550228,((n196:0.007806984177091112,(n437:0.002781257813951685,n42:0.0009731407513487462):0.00000100000050002909):0.003985559415513101,n395:0.0039254265519976):0.0012868685485924638):0.003956747542874375):0.0004508503595361632,n227:0.004310795297814267):0.0003796890693639416):0.0004607675503787447,(((((n290:0.002324805391273781,n215:0.0017533540933674253):0.002944530020318712,(n456:0.0017198522775857125,n411:0.006496468894381214):0.0021768777626674247):0.0005593474936277779,((((n346:0.011151305981301833,n45:0.01201081906907163):0.002077343058267125,(n330:0.011187156324890066,((n428:0.0028997096112810122,n179:0.0020810374709190867):0.010457585523626065,(n101:0.005721941243778887,(n38:0.0024390598940956182,n413:0.004116684591656852):0.0002347492155683607):0.0012055316420531393):0.0017816164307544813):0.00023594376689401318):0.0005014164247994936,(n449:0.005239402036051698,((((n72:0.005054717140202133,(n58:0.00608532923303461,n473:0.00000100000050002909):0.0010438169024489924):0.0011551397859181822,(((((((((((n59:0.00000100000050002909,n461:0.00355832892083035):0.004742300710334772,(((n90:0.0019035491123060328,(n181:0.0025007468411771343,(n107:0.003285789618806345,n386:0.00000100000050002909):0.0006574754571179455):0.00000100000050002909):0.004398368774593176,((n91:0.00000100000050002909,n378:0.00000100000050002909):0.005701701617480685,n343:0.0058207591971986975):0.006330456415211555):0.0016448470445397426,n299:0.010003710358680187):0.00000100000050002909):0.000226176595658448,(n308:0.004648719711687422,n178:0.0046342497663076476):0.005418379052982931):0.0002335377027512586,n374:0.01045893073185977):0.00021927741417739053,(n296:0.009167225879119544,(((n92:0.005088204462633805,n275:0.004698054725122906):0.0010288415911665224,(((n235:0.00000100000050002909,n347:0.00039397353635277945):0.00000100000050002909,((n216:0.00000100000050002909,n322:0.002698127179708738):0.0026610717632227607,n81:0.0018228207878313524):0.0006423876528593977):0.00000100000050002909,n208:0.004272472954715834):0.0008633275887959315):0.0005219734303425223,n271:0.005918177316326987):0.0005619963325009685):0.004764399148903642):0.00000100000050002909,((n339:0.011929908600923918,n57:0.0005843404935584791):0.0005780421459035379,n121:0.0017361572282796034):0.0005773744428570282):0.00000100000050002909,n401:0.0017419328314766235):0.00000100000050002909,n1:0.0032306313810187763):0.0005802824288616767,n106:0.005314182528964959):0.00000100000050002909,(n329:0.005234846283041516,(n300:0.0005797348656676147,n295:0.0018098518221321878):0.0005853713342078517):0.005798574269864776):0.0005798539740321379,n327:0.00468404222144827):0.00000100000050002909):0.0017607864468603917,((n397:0.00000100000050002909,n422:0.0003073725084263802):0.0048845164237484705,(n146:0.0011854174474272977,n82:0.007327480396897925):0.005582411214921191):0.0003366158011624767):0.00020108656535994308,(n389:0.005397093220793073,(n373:0.004075771463910235,n151:0.005545598460841924):0.002963759485204681):0.0013929664042922946):0.00039160400948914096):0.00000100000050002909):0.0006362104374753143,((n61:0.005351153839712818,(n341:0.011632758016571843,(n193:0.00000100000050002909,(n6:0.00000100000050002909,(n29:0.00000100000050002909,n167:0.00000100000050002909):0.007452809493008186):0.00000200000100005818):0.006068104438954345):0.0018228947763973076):0.0006362305280417107,(n147:0.0027273495996798704,(((((n159:0.015578245709113106,n433:0.002079362796450335):0.0021129239548075053,(((((n148:0.0017274352533661545,n176:0.0017158973249768656):0.00000100000050002909,n482:0.0011488509859521577):0.0011448923955961845,n412:0.005825236889077504):0.0007873698513680139,n232:0.0032771453869782654):0.0008652393291935129,(((n24:0.0026704789214420446,n47:0.00000100000050002909):0.002929948728469146,(((n294:0.00000100000050002909,n404:0.002994238024887267):0.0018251357505319232,((n124:0.0006005044967683884,n123:0.0011337916755996477):0.00000100000050002909,(n363:0.0005288899239854068,((n350:0.00000100000050002909,n470:0.00000100000050002909):0.0011335002811442604,n457:0.0020581966449764316):0.00000100000050002909):0.0006419903658623053):0.0012854365622402971):0.00001014779144976978,(n13:0.0028667649483801565,n333:0.00000100000050002909):0.00000100000050002909):0.0019953836249769295):0.0012801659664808827,(n474:0.00000100000050002909,n4:0.0035075309026003886):0.0027027680697055034):0.000391680232882948):0.0007530432954918569):0.00066613594511686,(((n239:0.0065722401440127835,n223:0.015682924672551214):0.00000100000050002909,n233:0.013114231051264628):0.00058557480990675,(n68:0.008112797803039064,(n466:0.0030819347733354392,(n16:0.010004607483703196,(((n354:0.009263767483583572,n116:0.001711989858529462):0.00000100000050002909,(n477:0.0005772019181326894,n118:0.004253211442478875):0.00000100000050002909):0.0007581398206374382,n465:0.003836599009165768):0.0007950196997229135):0.000356990094630659):0.0005235800872256761):0.0002417875461329901):0.0007729883079662557):0.00000100000050002909,(n303:0.005006277350837685,(n458:0.004322374182592808,n376:0.005327316977932297):0.001124932862233138):0.0027351933500865066):0.00000100000050002909,n249:0.009681686928908815):0.00022877809553094227):0.00000100000050002909):0.001039369586430013):0.00000100000050002909):0.00019023942149595758,(((((((n18:0.0005713359881701335,n35:0.00000100000050002909):0.004601207729802263,((((n244:0.0022470094271278503,n269:0.007188640307948476):0.006085508347090367,n469:0.01078511898906629):0.00037946060576252687,((n459:0.004080488271662732,(((n60:0.00382550324784452,n225:0.005191808831934067):0.009898546570744139,((n207:0.009949425578798786,(n421:0.005150047755097526,(n55:0.007757203269679446,n335:0.008952326041451578):0.0027842897120582038):0.000698450087736451):0.00000100000050002909,(n328:0.007783494347029868,(n429:0.0015507720011237694,n242:0.00000200000100005818):0.005668121270996869):0.0005766313551091523):0.0004814116375499203):0.0002396034782334679,n259:0.007767668684413104):0.0002292764635536649):0.00000153234246822201,n8:0.008232039400551984):0.0000010871092618749):0.00000359899340151525,((n240:0.0029869213739799386,n314:0.0024902851005592906):0.00000100000050002909,((n318:0.01002595606383654,(((n291:0.002244719561503083,n226:0.008048909999017119):0.002731734252627658,((((n41:0.0026382083787654456,(n390:0.004123211003847452,n263:0.0022714055758482872):0.00001526913484551378):0.001585265276555424,n170:0.0029085545454773506):0.00157200504010159,(((((n158:0.0005737992029689551,n321:0.00000200000100005818):0.0024825360673202293,n356:0.002413175200019639):0.004976264299221046,(n150:0.003507910434025008,n63:0.00000100000050002909):0.0028757458658615442):0.0006188093391853272,(n48:0.0013360416390243823,n202:0.0023962335839853646):0.003413313641327448):0.0013644164941819218,(((n217:0.00115387436013339,((n5:0.018558009086767167,(n396:0.00000100000050002909,n144:0.0029650234054718265):0.005916192584018524):0.00000100000050002909,n361:0.001198301362974276):0.00000100000050002909):0.000595557065971951,((((n43:0.0048251403946999605,(((n214:0.0028341750932525615,n175:0.004979515792490244):0.0015140722678721637,n136:0.004326647333169299):0.005144275158392837,n229:0.0017401243164013934):0.0012177271156384038):0.0030245312769307435,((((n338:0.00000100000050002909,n133:0.00000100000050002909):0.0011527605227881707,n262:0.004840357168827452):0.00000100000050002909,n125:0.0017673440569204231):0.00000100000050002909,(n142:0.00000100000050002909,(n372:0.013941884724105142,n71:0.00426190772551365):0.001599496456825186):0.0005747232801379098):0.0011831054291347703):0.00000100000050002909,(n380:0.0023729550756213923,n218:0.0005843172998269904):0.0052976774703001085):0.00000100000050002909,n39:0.0035849198009320557):0.00000100000050002909):0.00000100000050002909,n7:0.001523994712435846):0.00000100000050002909):0.000529032257087684):0.00000100000050002909,n355:0.005808060098466052):0.0007537265230140167):0.002243772023844751,(n480:0.004622315557037185,(n287:0.012615726437989198,(n320:0.0041798201479901305,n403:0.0038554723386222214):0.0007377752890532605):0.0007024163509876924):0.0003517950398694555):0.00000100000050002909):0.00048632656685839484,(((((n241:0.002865226126259274,(n261:0.003960884081677155,(n161:0.012402051849865512,n243:0.0038150167106794854):0.002884670528391798):0.00000100000050002909):0.0018818350096662258,(((n316:0.0025853134286982094,(n201:0.003158520939143062,(n154:0.005166477207701998,((n265:0.00000100000050002909,n266:0.00000100000050002909):0.0020613559609409743,n260:0.0034839787230061176):0.00000100000050002909):0.00234191182936151):0.00000100000050002909):0.004396939651446694,(n281:0.010298812139300442,(n423:0.002341457368852318,(n379:0.0024041157002120607,((n25:0.00000100000050002909,n368:0.0023291656920559497):0.0005749319504511839,n27:0.00000100000050002909):0.000573542771677665):0.001152989904448414):0.0046953511883141745):0.001505765214780536):0.00000100000050002909,n384:0.004389273267743486):0.00000100000050002909):0.0013374095503934811,n353:0.0031364004533075388):0.00000100000050002909,(n309:0.009971778829449243,(((((n324:0.003482903317978066,(((n323:0.0016742083307787477,n310:0.00000100000050002909):0.0005691541439119957,(n391:0.004537255324586082,n171:0.0030170991893901725):0.0014593482913887574):0.0015185322254006783,((((n66:0.001440433318532147,n246:0.003784394978369961):0.003142125217499651,(n3:0.008351380102502217,n2:0.0034981607074290964):0.0017235936610726747):0.00000100000050002909,n417:0.005220621966088797):0.0005717760417219225,((n387:0.005780415208492576,(n348:0.0042718013019200606,(n439:0.005306621075639957,n304:0.004759416026817036):0.0011580922690736554):0.00000100000050002909):0.0017190728779669223,n122:0.005228824338382703):0.00000100000050002909):0.00000100000050002909):0.0005915825790841157):0.00000100000050002909,(n447:0.004061290815285839,n252:0.004688895555688081):0.0011492613297208716):0.0011824159570926853,(n276:0.005064563695294172,n344:0.0035030076072966767):0.003216670971858247):0.00037993579276719404,n230:0.0066569523622997066):0.00000100000050002909,n162:0.012261668032654285):0.00000100000050002909):0.00000100000050002909):0.0004963978821482639,n462:0.005411331126990159):0.0003430690203733026):0.00000100000050002909):0.00000100000050002909):0.000754358319334763):0.00000100000050002909,((n166:0.009176050176471329,(((n177:0.011853170295993193,(((n120:0.004437230059489494,n399:0.001285282861142463):0.004392657579769513,(n37:0.004713641279743257,n54:0.0045246909906949415):0.0011940594510453102):0.00000100000050002909,n188:0.000904242528060218):0.00042807606277995105):0.0013627984651923943,((n305:0.018299481190976512,((n366:0.002919643045112833,n134:0.004440870442056041):0.0007045432821866489,(((n349:0.005756185859976447,((n383:0.0012733085306761323,n467:0.0017542081998143059):0.0019118642025118902,(n110:0.00000100000050002909,(n186:0.0012763292145325804,n236:0.005992495255810674):0.00000100000050002909):0.0011740885508497469):0.00000100000050002909):0.0027130382846164303,n83:0.005080467667365201):0.00175315540274487,n44:0.0070483238668341665):0.000689720578448904):0.00000100000050002909):0.00035926027954732715,(((n313:0.001195783570024465,n336:0.0042456759110298765):0.0035795549119862474,(((((n415:0.00000100000050002909,n85:0.002018526271297228):0.001679055417200699,(n307:0.00000100000050002909,n247:0.0012253986649171014):0.0009340736531161714):0.00000100000050002909,(n254:0.0023383996066427015,((n163:0.0011590797823714876,(n192:0.00000100000050002909,n113:0.0005792266936550476):0.0011838497063936385):0.00000100000050002909,n382:0.004131500904497882):0.0017810330572277883):0.0005887919672778764):0.002494774744518014,(n301:0.005075548865718197,(n94:0.0005833236612255414,((n351:0.004928937808543031,(n326:0.002348490423428301,(n194:0.0017966276534438833,n444:0.0011951612489845605):0.00000100000050002909):0.0005821890503259091):0.0005855601075757152,n190:0.001272190656760115):0.00000100000050002909):0.00000100000050002909):0.0006835517147631447):0.00030660673128122195,(n471:0.004555246265075662,(n96:0.00000100000050002909,n108:0.0033885504453308166):0.001689691224300995):0.0005754559794992766):0.002218918506446814):0.0005843348594941569,n19:0.0032350494266223614):0.0009427989402005761):0.0019316955879196517):0.00000100000050002909,((((((n9:0.00961178682651848,n52:0.003874141137288391):0.0013685081947204464,n155:0.00931372930006192):0.00000100000050002909,((n358:0.0023099851421312,n138:0.0005807245657250044):0.0013833119048954612,((n69:0.0010578360975816272,n75:0.00000100000050002909):0.002630013723969952,(n199:0.0012802022127506158,n187:0.00000100000050002909):0.0017581267751166545):0.0009229923091321427):0.000610933706823839):0.0008191585349784743,n451:0.013352057039331275):0.001622541250477596,n88:0.01258749769967818):0.0019455296212129614,((((n204:0.00000100000050002909,n206:0.0012037352172692116):0.007210696171971476,n127:0.011281112747669974):0.0021780546211993997,(n168:0.013903631794697467,(((((((n231:0.00000100000050002909,n70:0.00000100000050002909):0.00000100000050002909,n135:0.00000100000050002909):0.0098917129706879,((n464:0.0009279221380810132,n317:0.006535508484690661):0.0004898092047365657,(n280:0.0019248639363702393,(((n443:0.0006075373159303151,n445:0.003769502972592784):0.000579071527763545,n128:0.0026844010492098557):0.009969314444568302,((n111:0.0019876659369248767,n182:0.00699540325208759):0.00000100000050002909,n359:0.000573783138406399):0.0028960856003362036):0.000794828434886099):0.0008991576355723078):0.00000100000050002909):0.00009263494675371725,n153:0.004260809316428559):0.00000100000050002909,(n424:0.00000100000050002909,(n398:0.00000100000050002909,n34:0.00000100000050002909):0.00000100000050002909):0.005430726515775712):0.00009064950913905206,n476:0.0024021283132034154):0.00015319171258764254,(((((n46:0.00000100000050002909,n112:0.00000100000050002909):0.0005823287984596244,(n228:0.00479539235511732,n119:0.00000100000050002909):0.00000100000050002909):0.00000100000050002909,n115:0.00000100000050002909):0.00000100000050002909,n212:0.00000100000050002909):0.0018527071567177775,n284:0.003094427670834311):0.0006162547861082032):0.0005033798530530648):0.00042026582498102557):0.0011212893302687374,(n460:0.0006586296109183207,n334:0.00030989526801179296):0.004251917320432576):0.0003619058416723339):0.0005055439875440874):0.0007157072730964954):0.0009471085228701559,((((n174:0.009915635037837706,((n416:0.0006493708611855152,n56:0.0013141143953435716):0.004491037263555685,(((n140:0.004074890985919526,n250:0.0014877591482292311):0.0025551441994559718,(n100:0.00000100000050002909,n64:0.013504658392236355):0.0008007368636857387):0.0005416467669280023,n357:0.008948678725304424):0.0021128790448168553):0.00000100000050002909):0.0017259540881107188,n10:0.006596726736016746):0.00024514340981191777,(((n475:0.0019199744723197574,(n36:0.0011799947828824303,n367:0.00000200000100005818):0.00000200000100005818):0.0017422769359061439,((n0:0.001726285123775127,((n289:0.0025174724999471217,n360:0.000600710661547941):0.00000100000050002909,(n130:0.004742645483842728,n332:0.002235792200439193):0.0021769013844224216):0.00000100000050002909):0.0004934699232962152,(n436:0.0025603837384439595,(((n286:0.0011701587485386646,n157:0.0006171959483544056):0.00000100000050002909,n472:0.00000100000050002909):0.0005579620761979135,(n337:0.0005789664883415971,n197:0.00344074179747912):0.00000100000050002909):0.0012467058698054211):0.0013235122778728651):0.00000100000050002909):0.00041891359064416377,n311:0.007699793164477267):0.003038533145499413):0.0017456925503127419,(((n103:0.0014300161018883934,n137:0.00000100000050002909):0.00821594911287794,(n93:0.0023651160049442217,n418:0.005342936741220984):0.004225416782039462):0.0066293856512589094,((n298:0.004056073234805991,(n15:0.006795559582609516,(n392:0.00461657738620512,n220:0.001413397197895001):0.0006666165229364431):0.0007456166075734669):0.0006641626675304986,((n369:0.00000100000050002909,(n414:0.00473487796676566,(n185:0.00000100000050002909,n267:0.002917298708464039):0.00000100000050002909):0.005091643031237804):0.0016348101766089156,(n152:0.007072477649138071,(n102:0.001430927982785918,(n109:0.00000100000050002909,n446:0.004529161142971317):0.00000100000050002909):0.004657985276998711):0.00033056744059126403):0.0003058326983151732):0.0007029438626751941):0.0003594891328122963):0.00025725263679174116):0.00023529734954926755):0.00026519590045138373,((n481:0.006493241604175791,(n455:0.013198912282446112,(n117:0.003308308908927084,n23:0.005750325883658254):0.003000760306844352):0.003286308382918233):0.003706524422826338,((((((n141:0.007971747162072636,(n209:0.010323484436406143,(n73:0.0041396918022510104,(n79:0.005830543378445874,(n381:0.01901916000763407,n26:0.01790675690533139):0.00000100000050002909):0.0024071717170485365):0.00000100000050002909):0.0006979616621257495):0.00000100000050002909,((n340:0.00000200000100005818,(n14:0.00000100000050002909,n434:0.00000100000050002909):0.0005732110706505062):0.010507819817796924,(n364:0.009973635119809789,(n145:0.0023588365485147345,n388:0.0005725785106772224):0.0057330419352912285):0.0017984536039213773):0.0005614549444857792):0.0003438076139358184,(((n237:0.009975448839740959,(n345:0.014118446191769047,(n450:0.014041220332552826,n189:0.00714982315409389):0.001117599825752723):0.0004968913633589864):0.001174816434781368,n160:0.01321322814238737):0.00000100000050002909,(((n238:0.002888032416943334,n255:0.00000100000050002909):0.0040276290283139966,n50:0.015324659506408432):0.00000100000050002909,(n273:0.009992404966617317,n441:0.003440897506829429):0.00000100000050002909):0.00000100000050002909):0.00000100000050002909):0.00017518824850355663,(((((n306:0.0023449219860822027,n425:0.007998396476811507):0.00000100000050002909,(n258:0.00000100000050002909,n405:0.0012017851123851692):0.0005849477613028901):0.00000100000050002909,(n438:0.0058996737945505254,n224:0.004263324436687378):0.004979454669561581):0.0033095676389027335,(((n440:0.002807735244268166,(n377:0.005101701812344529,n468:0.001266472527771227):0.002342483598699663):0.0012124980632455481,n78:0.001740198060217879):0.00000100000050002909,n210:0.008099592903228325):0.00000100000050002909):0.00000100000050002909,(n32:0.002533730002576253,n211:0.0013770925334302044):0.0007191186336425354):0.0015631905857663633):0.0006073809176767433,n89:0.009697036486956474):0.00037503593426117923,(n302:0.0030725424046945276,(n184:0.003520558814854987,(n76:0.004309149386893289,n20:0.001951692669203293):0.0034524939494831367):0.022834565248904155):0.004004441940306498):0.0025085500788191535):0.00000100000050002909):0.0003980990951460128,((n222:0.01798416867735896,(n139:0.0030075121790266533,(n195:0.005797722120452658,(n278:0.0034815660375890375,n84:0.00000100000050002909):0.003731921676219117):0.0012954466625456579):0.0024968389765324174):0.0018539210957282208,((n315:0.006396235428375,n80:0.0060313077431709715):0.006053180539565668,n288:0.0028430987735840424):0.0039991023330364795):0.00047770602066793687):0.00039441528740470795,((n105:0.006007190332823662,(n432:0.001810670131863661,n67:0.00000100000050002909):0.0029222623185467815):0.0033208139433717524,(((n453:0.004895047600493132,((n331:0.0007299614792302033,n31:0.0005946506505191491):0.0021710991025292352,((n17:0.004379686731500202,n277:0.0017344192193879423):0.00000100000050002909,n51:0.005227944815097337):0.0009931656585802106):0.0005003454990985329):0.00000100000050002909,n292:0.012141654490092718):0.001570736140896932,(((n402:0.0011431687208869775,n77:0.0016786986856965418):0.006751915616960166,(n420:0.007854275846216258,n319:0.0025364096017704194):0.002782251831639984):0.00117642732622351,(n400:0.015934040423985305,n213:0.007244183244085279):0.0005341884328545518):0.003436588600797814):0.0004567128347562643):0.0011602415906363185):0.00000100000050002909,(((n248:0.00000100000050002909,n129:0.002038861506136407):0.006142326719940826,((n95:0.00822800198633414,n251:0.004076782514266892):0.0035746403371709704,((n297:0.006985877846676447,(n270:0.0006220972097789849,n274:0.003165602353140464):0.002495278290364648):0.002172458355245544,(n183:0.00000100000050002909,((n99:0.0017138269647432194,n200:0.001826677319352664):0.0011421813062592464,((n98:0.009007475844852637,(n245:0.0029720295624540076,n285:0.00426411464340915):0.00000100000050002909):0.005458514081231883,n442:0.005242193481741543):0.00039095115938877947):0.0009110509004150308):0.002332475624356843):0.0015093496154003575):0.0008937067889385463):0.0003014431840919098,((n169:0.0030545791601418806,n172:0.005078967811747997):0.007341893808579216,n283:0.005434336809779193):0.0011192659203267156):0.00018380384424033402):0.00018472262020775103):0.0013327692530211291,n448:0.005920670098409883):0.0005446957060648944):0.0007715233336216708,n21:0.005308441018950261):0.004012346928175434):0.0024753476706033174,(n454:0.013602373543291545,(n87:0.015429153784302724,n257:0.013156411412946878):0.004300498167659098):0.0005191155946808505):0.004006747129288613):0.0019497403177160658):0.0012309709192059347):0.038987879849010525):0.007842859502733196):0.05695052338390926;
	TREE 'Imported tree 8++' = (n114:0.06217411102991882,(n65:0.0828943071024553,((((n74:0.00881855255767545,n143:0.016641777851305817):0.0035392459554284225,n406:0.018846790669538996):0.0008440258864081118,((n86:0.01713970807428966,(n431:0.010649296298134036,n253:0.006192593395099777):0.0037209903404552126):0.0049898228260289185,(n430:0.012760528373209259,(((n463:0.0056840483356997915,n264:0.005418567995828581):0.0038598120418231875,n385:0.008724229983666775):0.0036038194788024043,n279:0.014404919454150737):0.000559946188679422):0.002264068262678104):0.0007822964783836415):0.0024803054910247924,(n393:0.01340870238243468,((n33:0.016384145070371975,((((n62:0.005496784941331163,(((n132:0.0044665422775313005,n198:0.002890651131377766):0.002818819900146092,((n149:0.005501220101442182,n12:0.004934108527046831):0.00000100000050002909,((((n221:0.0005435037168611038,(n234:0.00000100000050002909,n342:0.00000100000050002909):0.0010486284999255344):0.0010465918654377303,(n156:0.007259480997135661,n394:0.001568562983294331):0.005144196499951653):0.00000100000050002909,(n479:0.00741837740965824,n426:0.005391319965556743):0.00000100000050002909):0.0005503425062649769,((((n164:0.000838373169451461,n365:0.00000100000050002909):0.00221890161347597,((n11:0.007074089143672751,n352:0.0025036996605482735):0.00026234792440864627,(((n126:0.005327792889848471,n173:0.0007816494517880175):0.0012231127763531,n293:0.006119329830989704):0.0007115087721174108,(((n30:0.004719139826321793,(n375:0.0009304894883236744,n371:0.0014009698431023292):0.000929738720614253):0.003277333555146663,n419:0.005309103489313287):0.00000100000050002909,(n131:0.0012032493832225101,n435:0.004791331246330867):0.0007850417510398346):0.00000100000050002909):0.00000100000050002909):0.00000100000050002909):0.00000100000050002909,n452:0.005126357006658599):0.00000100000050002909,n28:0.008238765348652616):0.0007654045309684866):0.00021900104146176862):0.0010442220194336305):0.00017394006397883504,(n478:0.009813147442398506,((n203:0.0048448146620978004,n427:0.002476472863181164):0.007926956152161177,n97:0.004927150239886637):0.00000100000050002909):0.00000100000050002909):0.000712737326154373):0.0013357036388065057,(((((n165:0.0006271133497533848,n49:0.0018685986443221128):0.0017022197208236072,(((n410:0.00000100000050002909,n408:0.00000100000050002909):0.0008522877285901484,((n104:0.003597466912284173,(n22:0.005526747484472325,(n256:0.0025798846250389487,n205:0.00000100000050002909):0.002037236245900051):0.00000100000050002909):0.00000100000050002909,(((n312:0.0008530651560452456,((n409:0.0032439112911657464,n53:0.0028446100997832364):0.00000100000050002909,n219:0.0031788429750008672):0.00000100000050002909):0.002241869679146455,n407:0.003367428037718397):0.00000100000050002909,(((n40:0.001626526694878714,n282:0.0010553986882977289):0.0015736271846571658,(n180:0.002576599189575758,n191:0.006193884319420338):0.0007749747097888231):0.00000100000050002909,(n325:0.0025107609679591004,n370:0.0003094117661916685):0.0006907839554699683):0.0004936218424211273):0.0002467034976775839):0.000739582492536488):0.00000100000050002909,n362:0.0057606469619572885):0.00000100000050002909):0.000483787887424625,n268:0.003523079251081254):0.0017546374712243793,(n272:0.009838486585504411,((n196:0.005500942783327727,(n437:0.003645559191505041,n42:0.0022240250045204597):0.00000100000050002909):0.002155957196925403,n395:0.005509488586834598):0.0009286125249270836):0.0025796947795352007):0.0006358122210223197,n227:0.0046003978370578935):0.0002088336620862938):0.0007220144857947743,((((((((n59:0.000747943367421827,n461:0.005529322822200631):0.0038667038801665104,n299:0.010183228418078812):0.00000100000050002909,((n308:0.005117928595664483,n178:0.0038368312809676304):0.004436477552225713,((((n329:0.005273843396944264,(n300:0.0005283538780665265,n295:0.0010993886299743253):0.0016014192668130525):0.0074038391127782,n106:0.0058912822349165275):0.00000100000050002909,(n327:0.0026583165086497486,(n72:0.0038207297856391862,(n58:0.002630941914036632,n473:0.0017714395818533314):0.0014778151819923062):0.00000100000050002909):0.0012360502799983657):0.00006322350259422945,((n57:0.0010526734577178478,n296:0.0062398578354743274):0.00000100000050002909,(n1:0.0138040131398062,(n121:0.0020971224671813248,((n339:0.0026720929205219924,n401:0.0005292789355317137):0.0010496541403640185,(((((n235:0.0022005427509616125,n347:0.0010787531275474654):0.00000100000050002909,((n216:0.00000100000050002909,n322:0.00000100000050002909):0.002353331183569573,n81:0.0010884976548609666):0.001761698652615175):0.00000274296031691411,n208:0.004870565713664045):0.0003703608721025068,n271:0.00632076159167226):0.00000100000050002909,((n92:0.004147130241190718,n275:0.005496307146540269):0.0007577267026673468,n374:0.006273031409338172):0.0011088054286409687):0.0004494860287325364):0.0008954029433378165):0.0004389223916428926):0.0004539319050141774):0.00043070097805758203):0.00031662490983518386):0.00032711428754398183):0.00000100000050002909,((n90:0.0008603130144924302,(n181:0.0016941520200106973,(n107:0.0005254720654540789,n386:0.00000100000050002909):0.0009084843486018725):0.00024263097931993436):0.0027220336084358408,((n91:0.00000100000050002909,n378:0.001137151083349059):0.008475323544554627,n343:0.005695048662797164):0.00000100000050002909):0.0006286407770711505):0.0011815224429222908,(((n389:0.004428618097833877,(n373:0.0016628507277755993,n151:0.0057382059385205):0.0009726336944390026):0.00044991074549576764,(n330:0.00970265934162119,n449:0.006323290400899066):0.00000100000050002909):0.00000100000050002909,((n179:0.0010596117441799785,n428:0.000653602796031343):0.005335200149760532,(n101:0.002590027938891089,(n38:0.0032039362349337627,n413:0.005899119248720442):0.00000100000050002909):0.00205363048546902):0.0020720837796494225):0.00000100000050002909):0.0003903089570303032,((((n341:0.007678983088842968,(n193:0.00000100000050002909,((n29:0.00000100000050002909,n167:0.00000100000050002909):0.006304811671407007,n6:0.00000100000050002909):0.00000200000100005818):0.005993843931652533):0.000328070991716219,((n433:0.006373519042836479,((n68:0.004246707854910173,n61:0.006390295603090504):0.00021123271834216058,(((((((((n148:0.002113746861000693,n176:0.0010105318776458191):0.00000100000050002909,n482:0.0015848644296077145):0.0003348535898067156,n412:0.009203728952604972):0.0004270448347983834,n232:0.00456702954458524):0.0006089847420396268,((n24:0.0031442297591632944,n47:0.00000100000050002909):0.0015321377353313933,(((n124:0.00000100000050002909,n123:0.0015816837494292391):0.001060514572933416,((n363:0.0020330226728674946,(n470:0.00000100000050002909,n350:0.00000100000050002909):0.001578509319505668):0.00000100000050002909,n457:0.002849962515998993):0.00036011151736705966):0.002185296047402541,((n333:0.00000100000050002909,((n294:0.00000100000050002909,n404:0.0016843502096563195):0.0032217682588607504,((n474:0.0006424151652296671,n4:0.0032836728055125326):0.0025417778756531744,n233:0.009499948645696378):0.0005691136374821045):0.00000100000050002909):0.00000100000050002909,n13:0.002112453147684893):0.00000100000050002909):0.0014658367303841593):0.0006947948993327387):0.00032806019826320915,n159:0.01579238029705142):0.00018274125183799557,n249:0.007259089180533333):0.00000100000050002909,n376:0.006598131924898191):0.0005592806069771261,(n466:0.0023900476591414343,(n16:0.0085267775354158,(((n477:0.0005337296070300597,(n465:0.002893447496851273,n118:0.002669360232947604):0.00000100000050002909):0.0015873004118902372,n354:0.009084224463938362):0.00000100000050002909,n116:0.0020976910349860844):0.004854240625080275):0.000977969867683488):0.00047946926088903965):0.00018758755684625633):0.00000340378984738701):0.00035867860315714497,(n223:0.00965561934667121,n147:0.0040903797491849275):0.001043935492247091):0.00000100000050002909):0.00000100000050002909,(n303:0.005227207638504492,n458:0.005578005099802615):0.0021902283877968977):0.0010776078518662776,(n290:0.0015806452498938557,n215:0.0016139867161630741):0.003747327488267154):0.00000100000050002909):0.00000100000050002909,(((((n248:0.0008017182139409497,n129:0.0031986270981217008):0.0024460916120634395,(n95:0.005179198553756523,n251:0.004796674528287624):0.00226183716333945):0.0005634010833306484,n283:0.0035773741388734396):0.0002347546288783687,(((n456:0.003147278989103903,n411:0.0062594289627662435):0.004101577210062645,(n166:0.007468767489561403,(n287:0.00808345288377246,n480:0.0037291206988360774):0.0021944188395107444):0.0007950435389537346):0.00000100000050002909,((n432:0.0011274604348873785,(n67:0.00000100000050002909,n105:0.004384006411626298):0.0012200684314329097):0.0036823972628399248,(((n453:0.0038963526138150757,((n331:0.00000100000050002909,n31:0.0010800025443833633):0.002101200484862467,((n17:0.004559304696796826,n277:0.002104765248959232):0.00000100000050002909,n51:0.006311955076856365):0.0015181434408759289):0.00000100000050002909):0.0019060137495434805,n292:0.006055295344090854):0.0006292067231018154,(n213:0.005746310542444823,(((n402:0.00000100000050002909,n77:0.0007918496525627516):0.001770095909939112,(n319:0.001981884318231546,n420:0.006969294437384962):0.0011973201459510373):0.0008889490144723389,n400:0.014046649047851691):0.0001311493158485159):0.0012712066382154037):0.00018464206544287968):0.0012742569208408626):0.0005834040226514898):0.00015030014483787294,((n169:0.0041888251547718865,n172:0.004866149717301249):0.008315375310656362,(((n481:0.0060288525848353714,(n23:0.013558226081124778,(n455:0.009004916884708794,n117:0.007337563658744852):0.002068360671018578):0.00136775734070451):0.0014848437866600138,((((n305:0.01506299062924398,(((n146:0.0006700560866311411,n82:0.0068139636259754565):0.00609881713314287,((((((n9:0.005257581731094116,n52:0.0027933270552898547):0.0017302963402237158,n155:0.008030721928065318):0.001060307096646542,((n358:0.001990224371554572,n138:0.0018776367358760509):0.0007240831127108213,((n69:0.0015747520860559746,n75:0.00000100000050002909):0.0010320354174303838,(n199:0.0011958482690075428,n187:0.000554544873521938):0.000542872605740704):0.0005178745178965195):0.0005685113452427896):0.00000100000050002909,n451:0.01083337374907595):0.0023432844461459103,n88:0.008791060302461044):0.001150067921359505,((((n204:0.00000100000050002909,n206:0.0005473902700641536):0.005055114600274588,n127:0.010259294949051808):0.001573057052461583,(n168:0.006611554894359578,(((((n46:0.001612831555080441,n112:0.00000100000050002909):0.001078024667125445,(n212:0.0009586289605742498,(n115:0.00000100000050002909,(n228:0.006966403773014308,n119:0.00000100000050002909):0.0017278461226868896):0.00000100000050002909):0.0014363677429882285):0.0004800096517855004,n284:0.00288016701979953):0.00001140459112148902,n153:0.0039812775957617005):0.0005530058055810092,(n476:0.0016693080111952689,(((n424:0.00000100000050002909,(n398:0.00000100000050002909,n34:0.00000100000050002909):0.00000100000050002909):0.0034361542449017706,(n231:0.00000100000050002909,(n70:0.00000100000050002909,n135:0.00000100000050002909):0.00000100000050002909):0.0059042344067591875):0.0009944998509613346,((n464:0.0011471847414751058,n317:0.0030141257134080057):0.00000100000050002909,(n280:0.0021670766328338127,((n111:0.0004468052159716703,n182:0.005558976481350292):0.00000100000050002909,n359:0.0015787754969819822):0.0040807666098862565):0.0008092901569208578):0.00000100000050002909):0.0009624950956577258):0.00008636567225303201):0.0004469068184832108):0.0013524322916724147):0.0015240266781629684,(n334:0.0008630556231716364,n460:0.00000200000100005818):0.004319646429502442):0.00034376381826217196):0.0003431323161291767):0.0005004069831729979,((n120:0.003129037200870017,n399:0.0018284094141825795):0.005857015478975106,(((n37:0.006550725390816227,n54:0.00193185067262821):0.0010418881381757709,n188:0.0017634037872229361):0.001160688087636354,n177:0.014012874174707032):0.0009378231348667668):0.0024168901602901255):0.00032742571116365325):0.00016886616073561144,(((n134:0.004007885360134033,((((n349:0.0047148859847611566,((n383:0.0005225661169176826,n467:0.0010748231329151374):0.0010415773431497644,(n236:0.005524882309571457,(n186:0.0017367661970767738,n110:0.0010613328302426326):0.00000100000050002909):0.0026718501098669696):0.00000100000050002909):0.003541367803854164,n83:0.0028003133771609227):0.0031413981499930914,n44:0.010443114999338884):0.0021856444297394103,(n366:0.004282340016502249,((n443:0.0011201798730183102,n445:0.0011692224764187373):0.00000100000050002909,n128:0.0034664929069619026):0.007133702121429107):0.002897413808201963):0.00000100000050002909):0.00000100000050002909,((n96:0.00000100000050002909,n108:0.0003660251537931697):0.0015951024513435213,((n301:0.002368199945150523,(((n190:0.002978880333729605,(((n444:0.0005509983504294453,((n351:0.0011525716142484852,(n85:0.0015193188211836664,n415:0.00000100000050002909):0.00243352358018149):0.0009095217444117031,(n307:0.00000100000050002909,n247:0.0018069082190311136):0.000973870515116047):0.00000100000050002909):0.00000100000050002909,n326:0.0016211345998411876):0.00000100000050002909,n194:0.0011071386822656991):0.0019953194715826455):0.00000100000050002909,n94:0.0016274443246866738):0.00000100000050002909,((n254:0.0021489629527206055,((n163:0.0010691563379660175,(n192:0.00000100000050002909,n113:0.00000100000050002909):0.00000100000050002909):0.0010683613620250704,n382:0.0032967067868476152):0.0005341518146205433):0.0005339068043877577,(n471:0.002442384624467251,n19:0.0007655200628065142):0.00000100000050002909):0.0005706608552152771):0.00000100000050002909):0.0002979513324672967,(n313:0.00000100000050002909,n336:0.00569009981593222):0.005473286542480278):0.0009379270243324759):0.002069074569768323):0.002012261229132968,((((n174:0.008353313603048779,((n416:0.0006049158883920544,n56:0.0021615692335390244):0.004255473875996439,((n357:0.008289332711907594,((n140:0.0019080827385471956,n250:0.0014272623782216652):0.001523273579617738,n100:0.0005028836905919809):0.00015458327146763797):0.0009088701912256731,n64:0.025838639263049367):0.0017860501284871519):0.00000100000050002909):0.000835565689280498,n10:0.0032848666951521607):0.0013260470209879337,((((n367:0.00000100000050002909,n36:0.0005443664756855618):0.0014256859879149893,(n475:0.0017505929953434078,((n197:0.004704759714108876,n337:0.0015790913915330758):0.00000100000050002909,((n286:0.0005403324998885464,n157:0.0022762338301566447):0.0005252423477263367,n472:0.00000100000050002909):0.0005128418091852787):0.00042481828406042144):0.000426187907042041):0.0017704625968881678,(((n130:0.008269738988437577,n332:0.004138524438667127):0.0036658134904536148,((n289:0.003469714808315775,n0:0.001268014839902189):0.0007769404393187568,n360:0.00000100000050002909):0.0005100316758855734):0.00022816068857596842,n436:0.0023722346210237988):0.00019874978766285897):0.0010527007223188152,n311:0.010606173456347241):0.002043155809843519):0.002309956008077566,(((n103:0.0006413827555887036,n137:0.000744477020302906):0.002494482004223459,(n93:0.003188486804540096,n418:0.004622621669914756):0.0046392871414998515):0.0018993022635388917,((n298:0.005909224138822914,((n369:0.00000100000050002909,(n414:0.0016327690875240716,(n185:0.00000100000050002909,n267:0.00159459169293657):0.00000100000050002909):0.004151460830924071):0.004403196783742871,(n220:0.0009687886530074151,(n15:0.002044655110736678,n392:0.004222329020000034):0.0020563539621008464):0.0019361732365300742):0.0006794497867614962):0.00000100000050002909,(n152:0.005907358756857792,(n102:0.00031403940292627867,(n109:0.00000100000050002909,n446:0.008984173955368664):0.00000100000050002909):0.00410365661130754):0.0015263144167305203):0.0012706598400064445):0.0005586441299080319):0.00000100000050002909):0.0002956384664069463):0.00000100000050002909,(((n18:0.0010351758781906952,n35:0.0020226236322334794):0.0049578663869016435,(((((((n141:0.009041632512685055,n441:0.0037141273956570477):0.00203974141896468,(n345:0.015652131777911343,(n450:0.009710794052751116,n189:0.006228897967223215):0.0012108133436385692):0.0005540983350349116):0.0005196592625898747,((n209:0.015017272900319243,n364:0.006510391775190296):0.0008040992439514599,n160:0.009299761066667866):0.00167349738762067):0.00000100000050002909,(n89:0.010145039258711063,(((n238:0.0026240599032101987,n255:0.00000100000050002909):0.0036532244796027677,n273:0.013383867938925901):0.00000100000050002909,(n50:0.008221644185923062,n237:0.0057425427687017114):0.0007933834846530223):0.00000100000050002909):0.001555253268046192):0.00000100000050002909,((n73:0.006479770727459424,(n79:0.003237717987589657,(n381:0.006137697101186188,n26:0.008694635521093626):0.0011797416448302807):0.0008151705925039299):0.0007878986155247108,((n340:0.0015551829684442083,(n14:0.00000100000050002909,n434:0.00000100000050002909):0.0015483761169656114):0.005741338258613315,(n145:0.001163364407858841,n388:0.001465904345904113):0.006423241935065941):0.001554686830524358):0.0007041616725493273):0.0003591821974927107,(((((n306:0.00429629676066384,(n405:0.0005561881019699153,n258:0.00000100000050002909):0.00000100000050002909):0.0005227076355769459,n425:0.004505153293369592):0.0005068492646906469,(n438:0.007574808002379411,n224:0.004556737140517962):0.0040200768579918):0.0013325803457967993,((n78:0.004309953612429946,n440:0.0017295129079353806):0.0008109724628980841,((n377:0.0036264527431089876,n468:0.0012276382121383328):0.0023380089830973153,n210:0.004079841349340344):0.0006576846819636085):0.0011207711590664974):0.0011968262674757592,(n32:0.0039832279160376995,n211:0.0010423493213265265):0.0014307046504697136):0.0022108315832156935):0.0005974897045345898,(n302:0.0044238390485303305,(n184:0.0043273673495782435,(n76:0.00237037896544645,n20:0.003650225350909316):0.006458909127486799):0.013856364990533351):0.0013524629485551717):0.0006013975338038287):0.00000100000050002909,(n397:0.00000100000050002909,n422:0.0014158595793256374):0.003405325348963844):0.00033154269707710935):0.00000100000050002909,((((((n259:0.006116493312163054,(((((n39:0.006532955667383127,((n142:0.0005234395367136227,((n7:0.0013665268429884608,((n170:0.0015743527583440713,n217:0.00000100000050002909):0.00209406373840591,n361:0.0011034713158200409):0.0010571765026769638):0.00000100000050002909,(((n338:0.00000100000050002909,n133:0.00000100000050002909):0.00000100000050002909,n262:0.0015192538466832844):0.002014150198345468,n125:0.0016213589742223135):0.002017249175522432):0.001233440681197569):0.00000100000050002909,(n43:0.005470263798550607,(((n214:0.00436874342358039,n175:0.0038969195141794555):0.00000100000050002909,n136:0.001645851928495454):0.001961908705626932,n229:0.0015737879726870924):0.00000100000050002909):0.002153058136520939):0.00000100000050002909):0.00000100000050002909,((n396:0.00000100000050002909,n144:0.0010786528639144546):0.003249480040567414,(n71:0.008678040276057326,(n380:0.00000100000050002909,n218:0.00000100000050002909):0.004133669153476322):0.00013797224259456996):0.001049806087127228):0.0006316292490883225,(n372:0.013079227996113333,(((n48:0.000639764383803897,n202:0.002413840568264127):0.006222137804809629,(n469:0.007970893585667467,(n162:0.010826113517000071,n355:0.002628405108118317):0.00000100000050002909):0.00000100000050002909):0.001039737478803887,((n41:0.003989681394194454,(n390:0.002730635954005263,n263:0.0031741176388295407):0.005871534187158485):0.0026051935279421097,(((n158:0.0015671882469593444,n321:0.000522552374395712):0.004270362502315631,n356:0.00270688337412303):0.0018327112964096883,(n150:0.00264507422347363,n63:0.00000100000050002909):0.0015651525843774726):0.001214604321109255):0.0013190827576011104):0.00000100000050002909):0.00000100000050002909):0.00000100000050002909,n5:0.017680472452948737):0.0012669360496975032,(n226:0.00466050296597891,n291:0.006983247161996385):0.0016399952037783893):0.0022430400563918417):0.00000100000050002909,(((n297:0.005375136234070574,(n270:0.00000100000050002909,n274:0.0023716861255304853):0.002110927563025918):0.0026261095947807114,(n183:0.0010420701706202065,((n99:0.0010433580472834461,n200:0.0011222537704051203):0.0005169420758988699,((n98:0.009430802531498902,(n245:0.0004551211901394727,n285:0.005717668291349009):0.00000100000050002909):0.0034120636491834252,n442:0.004250281949795106):0.0013874412961858602):0.00043520146244305517):0.001305099169518615):0.0013675782912750494,n346:0.005777210275853889):0.0009222679918305633):0.00000100000050002909,(n320:0.002163981071330091,n403:0.002819398885246103):0.0018038852697597992):0.00000116689500798648,(n244:0.0008423606652829713,n269:0.007811756781943261):0.004423210324321465):0.00023873981964710338,((n8:0.0032683407058946,(n222:0.013148595894778013,(n139:0.0026676672103503178,(n195:0.005358274312525754,(n278:0.002129111152364164,n84:0.00000100000050002909):0.004385277756438522):0.0015216793747601012):0.0019235498015767814):0.002028834159733894):0.0009233067788469184,((((n459:0.002301651595334189,n239:0.005263941762930784):0.0004820252586268936,n240:0.00494536663768093):0.00000100000050002909,n314:0.0031954176860525666):0.00000100000050002909,((((n3:0.005365396013827911,(((n2:0.0037120850077210195,(n66:0.0021482814778190024,n246:0.003782694903359417):0.0007442007941174344):0.0010421584636843915,n417:0.005846272180963608):0.00000100000050002909,(n323:0.005432616436535039,(n391:0.007910370502667564,(n310:0.00000100000050002909,n171:0.004171512212741178):0.0007616102943112497):0.0010830626705244032):0.0014845062220253608):0.00000100000050002909):0.00000100000050002909,(n281:0.009998578276734322,(n387:0.004731778698081888,(n348:0.008768573631330044,(n439:0.00379987121641829,n304:0.0010766624640532324):0.0010505826372487028):0.00000100000050002909):0.0005132429395074416):0.0015017121325621836):0.0004028924089414109,n122:0.002600821293972343):0.0004004286552677821,((((n154:0.004021212284015093,(n201:0.0017032748068172815,n316:0.006370712687933595):0.0020793338809318974):0.0011977914901044114,((n265:0.001300670608751636,n266:0.00000100000050002909):0.00000100000050002909,n260:0.004218180902188867):0.0010311638189569748):0.0028843195243858427,(n423:0.0037416101117446103,(n379:0.0016300537986145998,((n25:0.0005265749998925065,n368:0.0010539541527507174):0.00000100000050002909,n27:0.0010444282007634018):0.0010440474469570337):0.0010423497428731542):0.003147693925484687):0.00000100000050002909,((((n447:0.00426057206633001,n252:0.004789704521569647):0.0005027862505020761,n324:0.002113067256282857):0.00000100000050002909,(n276:0.0017249709109935305,n344:0.002664628426319648):0.0034582963821967448):0.0012874574919736672,((n462:0.0049210030186222446,n230:0.00493626046592225):0.00000100000050002909,((n384:0.002477667656891399,(n318:0.008692294730392354,n309:0.007689884065906974):0.00000100000050002909):0.0022370091202040475,(n241:0.0026074424945749268,(n261:0.004279588231236488,(n161:0.011944771128918839,n243:0.0030985179861178235):0.004945194587721417):0.00000100000050002909):0.0010398509020310624):0.00000100000050002909):0.0007517679597387814):0.0006867385487245761):0.00000100000050002909):0.0008031334843866994):0.00000100000050002909):0.00000100000050002909):0.00000100000050002909,(n207:0.007553516093187879,((((n429:0.00000100000050002909,n242:0.00000200000100005818):0.006110129160985602,n353:0.004670048181095718):0.0004611267796716037,n421:0.0035038147061041986):0.0008505451852059193,((n335:0.007201966469219876,n55:0.006522728635298527):0.0002952580678554636,(n45:0.014601401523953247,(n328:0.0050180597212899445,(n60:0.00040268106353294816,n225:0.0035004813223826012):0.00764025550759532):0.0008468442736970666):0.00000100000050002909):0.00000100000050002909):0.0007795905726017107):0.00019497619060980674):0.0005385821074397585):0.00017096312491677183):0.00000235642301629763,((n315:0.0077596060997580235,n80:0.006354962633433522):0.004205829492371694,n288:0.002204907443261165):0.0014875725686433101):0.00000100000050002909):0.0001979750630310355):0.00038739736849657884):0.0010288583352662652,n448:0.004446288873433596):0.00018544237218293062):0.0006621951250549565,n21:0.004108024981355838):0.0019438039504165634):0.0021922812646615105,(n454:0.01396381426967927,(n87:0.015202313643748295,n257:0.015386867785605883):0.004507968216944288):0.0007329425388883811):0.0024041446610174725):0.00044520143601302185):0.04532668650920935):0.010628984879100934):0.05202778625771394;
	TREE 'Imported tree 9++' = (n114:0.0608091074743283,(n65:0.07828692083525265,(((n74:0.012401906537466794,n406:0.01808427622685085):0.0013059877927040677,(n430:0.011743337712892592,((n143:0.018134058747056304,(((n463:0.007225541402657386,n264:0.003996531535717229):0.003997425594108174,n385:0.007707501133905945):0.0027987938751711273,n279:0.01906253676184819):0.0018718360868193841):0.0016600515512051944,(n86:0.01632785822316467,(n431:0.010582427571019697,n253:0.010150644205434382):0.0035075025517390633):0.006245511837109608):0.00030612340333956145):0.000747160819428083):0.0005132550345363307,(n393:0.011487664045975367,(n454:0.011417317762553596,((n87:0.012466579397160938,n257:0.012189800042067019):0.0045108279223821405,(n33:0.01480907500258256,((((((((n256:0.005170890216876225,n205:0.00000100000050002909):0.002391025176766678,(n165:0.0012792802689252489,n49:0.0017353287802205192):0.0018327241072585573):0.00000100000050002909,(((n104:0.00425362491561824,(n410:0.00000100000050002909,n408:0.00000100000050002909):0.0020367469666250386):0.0011616369631684993,((((n370:0.0003119003372436842,(n180:0.0015781360925838503,n191:0.006322202499508706):0.0007321341618998825):0.0006417824877165897,(((n409:0.003980160381016535,n53:0.0018202690914970962):0.00000100000050002909,n219:0.0033167393581565842):0.00000100000050002909,n312:0.0014537208610202028):0.0020238931324690714):0.00000100000050002909,(n325:0.0046257341390212965,(n40:0.0011253413479472463,n282:0.001911066656903139):0.0003791214453078):0.0003244875287392689):0.00000100000050002909,(n22:0.00441786977916232,n407:0.003628427437550092):0.0010243425040358668):0.000869750728913541):0.00000100000050002909,n362:0.008100272502352995):0.0008877525615988411):0.0004742293631764449,n268:0.00543110383231519):0.0008811609319902909,(n272:0.005529396933900262,((n196:0.006914925089825867,(n437:0.0042272854973864045,n42:0.001064674854921531):0.0009735948276196512):0.002487901716320964,n395:0.006601111406955998):0.00000100000050002909):0.00223540282279692):0.0011358683053073117,(n227:0.004572453846727658,(n62:0.005782393073849578,((((n198:0.005260880174779581,(n203:0.0040833062499869245,n427:0.0021511927608444986):0.013496548297907298):0.0005809954369137454,((n149:0.004318400816529227,n12:0.005112877994532277):0.00000100000050002909,(((((n342:0.00000100000050002909,n234:0.00000100000050002909):0.00000100000050002909,n221:0.00000100000050002909):0.004940703204878472,(n156:0.004079182673818768,n394:0.000599315609972753):0.0029640603389456143):0.002367432949976196,(n479:0.008003534192892531,n426:0.004474889435413814):0.0009446112162694899):0.0012053723747029825,((n164:0.00046735743045938537,n365:0.00000100000050002909):0.0018593264588021884,((n419:0.007080671430168265,n352:0.001084563641197477):0.0015800436215059452,((n126:0.002073943470918437,n173:0.002011769518625354):0.0014310054252076958,((n97:0.005744994846121058,n28:0.005642513074869435):0.001957646015833394,((n131:0.0035947057035646745,n435:0.0038566136183960727):0.0019639818356873232,((n452:0.00474365029914181,(n11:0.004406967273063082,n293:0.003995871333312257):0.0013132509514791222):0.00000100000050002909,(n30:0.005435443941672797,(n375:0.003506270053180436,n371:0.0013086261858605028):0.0024022222006061197):0.003672898676510631):0.0008044982736774254):0.00000100000050002909):0.00000100000050002909):0.00000100000050002909):0.00000100000050002909):0.000780294863015949):0.0005243136733913734):0.0009493436674207973):0.00000100000050002909,n478:0.008427835668492192):0.00021329701598326095,n132:0.006509154078828177):0.0005425198072321601):0.0007505158926871246):0.00035765388681896845):0.0012336982699178425,(((((((n59:0.0009336283560312367,n461:0.005138727192945204):0.005412803648107665,((n308:0.0012313175570571198,n178:0.005100360630035577):0.0031743968078907837,(((((n329:0.006649024462297942,(n300:0.0010939400330870412,n295:0.0017266425321689155):0.0027976979425768946):0.008332935470624565,(n72:0.003644968999841071,(n58:0.006989578906654896,n473:0.00045604805879549):0.0014588902925653287):0.00000100000050002909):0.00000100000050002909,n106:0.005594619065210303):0.00000100000050002909,n327:0.0033296837320034084):0.001972442343022799,((n1:0.00439802366669653,((n339:0.01419341539213317,n121:0.0021942997826846834):0.00000100000050002909,n57:0.0011015797673361504):0.0021938392398787206):0.00000100000050002909,((n401:0.0016652695797150625,n271:0.007687389089525211):0.0012387163305262938,(n374:0.00825400018838114,(((n296:0.003421777949595103,((n235:0.0015157053542475384,n347:0.0003705932900958141):0.00000100000050002909,(n81:0.0011441417571312106,(n322:0.0006267514830521649,n216:0.0016898471731679112):0.0012502856997617872):0.0018643527856776936):0.00000100000050002909):0.00000100000050002909,n208:0.0056480042283720226):0.0009579787109235787,(n92:0.006705038404810045,n275:0.006751622372736022):0.0012342318790928483):0.00141185709457423):0.0007444057044881811):0.00000100000050002909):0.00010004152927092773):0.0007030697783808875):0.0007325572901667174):0.00000100000050002909,((n90:0.0022841450160385537,(n181:0.00000100000050002909,(n107:0.0014878827816106944,n386:0.00000100000050002909):0.0006171581363714891):0.00000100000050002909):0.0035476092620981706,((n91:0.00000100000050002909,n378:0.00000100000050002909):0.00536120663984082,n343:0.001005048720464031):0.003227685512776485):0.0018981834249031347):0.00010342553230948317,n299:0.007121661836486439):0.0021254019985761288,((((n389:0.009441933151235544,(n373:0.0025836271708632114,n151:0.00575934623040566):0.0009800808608527627):0.001893119077405034,n449:0.007562339950536277):0.00000100000050002909,(n330:0.010676929911675468,((n428:0.0013729332535574055,n179:0.0017570949158658294):0.008196899974712351,(n101:0.0032307471347638615,(n38:0.0020316288789633237,n413:0.003329786031481207):0.0005034120381222765):0.00020353767373849883):0.00182013557417996):0.001009509807243398):0.00019289870677807196,((((n223:0.011109740713873082,n147:0.0043289709329750225):0.0007619502729195413,((n303:0.005933959748226865,(n458:0.005026625663016016,((n474:0.0012856689155929977,n4:0.003964460727110864):0.0019173833890204519,n376:0.002400628937295955):0.001588183353649285):0.0010662704353787606):0.0017077165377734251,((n68:0.005447043817335107,((n159:0.00991211008729982,n433:0.003865372506648471):0.0018061197147559325,((n16:0.006404756460279932,n61:0.0042607192236402925):0.0006257737620451586,(((n466:0.0035961216311501897,(((n148:0.001631883687344798,n482:0.0010853530788611145):0.00000100000050002909,n176:0.00000100000050002909):0.0018868192380299136,n412:0.004390826551270745):0.00000100000050002909):0.0010291442913834073,(n232:0.005861600330188478,(n333:0.0006343473624143349,((n13:0.0016226149442526432,((n47:0.00000100000050002909,n24:0.002749035211246377):0.002345142664244866,((((n470:0.00000100000050002909,n350:0.00000100000050002909):0.0016156203570640204,(n124:0.0005708405767564421,n123:0.0016207802254456325):0.0021632927681392187):0.00000100000050002909,n457:0.0006177085660740102):0.00000100000050002909,n363:0.0004203656531401846):0.003778054100411772):0.00000100000050002909):0.0011735706687755361,(n294:0.00000100000050002909,n404:0.0017086937145516365):0.0028512430546881297):0.00000100000050002909):0.0017603422030077471):0.00000100000050002909):0.001415630808677308,(n116:0.0021619572780741847,((n465:0.001825775867369101,n118:0.004454472505032967):0.00040044478912382853,(n354:0.008771378015823724,n477:0.001094310750659099):0.00000100000050002909):0.00000100000050002909):0.0011986210262499488):0.0007694717059016118):0.0006569670515261649):0.00000100000050002909):0.00000100000050002909,n249:0.004733474255902615):0.00000100000050002909):0.00000100000050002909):0.00000100000050002909,(n233:0.015304084313882409,(n341:0.0064955506235399385,(n193:0.00000100000050002909,((n29:0.00000100000050002909,n167:0.00000300000150008727):0.004933566345008361,n6:0.00000100000050002909):0.00000100000050002909):0.005721784049698002):0.001017173842986002):0.0011466459683964951):0.0013659310588649124,((n456:0.0021762797977250407,n411:0.006782743410870284):0.00337867256528946,(n290:0.003867014000152612,n215:0.005952522436068019):0.0017758082939569242):0.0010590620841856705):0.00000100000050002909):0.00035668911198281016):0.00000100000050002909,(((((n207:0.009211924748501481,(((n429:0.0014295698163035928,n242:0.00000200000100005818):0.0065347180633591575,n421:0.0047806421704212265):0.0008533214265105805,((n335:0.008368686331615853,n55:0.00503258016881318):0.002208166338082719,n328:0.005367173185379927):0.00000100000050002909):0.00021167323254041716):0.00000100000050002909,(((((n481:0.00288958870989168,((n23:0.00793350551625568,n117:0.001488366837482259):0.002869199137836434,n455:0.010195612215225339):0.0015394937766389128):0.003350894861620868,n259:0.005794972268129643):0.00000100000050002909,((((n441:0.00491074243210539,((n450:0.00711327203878146,(n345:0.015936083227332306,n189:0.007168457106254704):0.00000100000050002909):0.0016410349928875525,(n145:0.001115121439417013,n388:0.0010736673067549595):0.008738328637734933):0.0006114588741402859):0.0010778191029765431,(n209:0.016482919236904602,(n73:0.00405895470495418,((n79:0.0038800440400518065,n381:0.010493531363140737):0.00037775199940596506,n26:0.01181054487312414):0.0004918878796374707):0.0005148256882369088):0.001218243939316273):0.00000100000050002909,(((n238:0.0016717671846533519,n255:0.0005172895584320227):0.005498174616740701,(n50:0.009659765121559315,n89:0.007907832821703903):0.00039724815825399005):0.00053255129704881,((((n141:0.006829030589845335,n364:0.004962583627775128):0.00000100000050002909,(n160:0.0064343198372121485,(n340:0.0010847611077910916,(n14:0.00000100000050002909,n434:0.0005380366525707744):0.001077318371655169):0.010606528375927545):0.0019899961378515418):0.0016238980381999284,((n438:0.0073576370338143925,n224:0.0038881888185511894):0.005232432515393488,(((n306:0.0016676234542821757,(n405:0.0005687298573371741,n258:0.00000100000050002909):0.0011063604856061794):0.00000100000050002909,n425:0.004117795246510097):0.0027247352240545096,(((n78:0.0016948515490585949,n440:0.002923583419721966):0.0003695770036526365,((n377:0.0034539589604135486,n468:0.0025123746681284275):0.000590330210126488,n210:0.007300083755826062):0.0014565561763082335):0.0006157847195977315,(n32:0.0031649492863529047,n211:0.00000100000050002909):0.001706964849791607):0.0003452731092981476):0.001384519386470847):0.0002791558523728625):0.00000100000050002909,n273:0.00996057395233293):0.0002734774109021698):0.00000100000050002909):0.0007200657865058862,(n237:0.006595668983951143,(n302:0.004150484968601208,(n184:0.003894293907412252,(n76:0.001909084402649526,n20:0.002499772029326226):0.008157530916575555):0.014748082528413099):0.0019271562964503141):0.0016641222723650624):0.0007251705316558613):0.00000100000050002909,((n248:0.001096699632029504,n129:0.00240614352310756):0.0035761466781498385,((n166:0.00668008919711752,(n95:0.00634174940879657,n251:0.006244155897527317):0.0032053109736418215):0.00000100000050002909,((n297:0.003877910093421289,(n270:0.0016131243084878727,n274:0.00000100000050002909):0.0024957446730088863):0.0024444753362934273,((((n98:0.006887018827476144,(n245:0.0010635583160158739,n285:0.006061583745983803):0.00000200000100005818):0.0045656835409878145,n442:0.00380824140176086):0.0009881330665434014,(n99:0.00000100000050002909,n200:0.0005828168051244438):0.0010806517610815406):0.00000100000050002909,n183:0.0005414275051017419):0.002011716371933525):0.0014816730504151603):0.0008582884587390329):0.0008604637116701738):0.0004994658437411679,((n60:0.0021663736123130107,n225:0.0029861538691779896):0.006487621507369915,(n239:0.005675352445435618,(((n314:0.0018079879131702547,(((n244:0.0021590466315514,n269:0.006263981340530441):0.00442789225709868,n8:0.004439674165657589):0.00000100000050002909,(n240:0.002835848895250558,n459:0.004290591237341692):0.00000100000050002909):0.00000100000050002909):0.0003009358686727239,((((n45:0.011293087097735775,n353:0.004290172628876276):0.0015965319010646482,((n309:0.009812377979735047,((n241:0.003798484218482579,(n261:0.0012422152808036077,(n161:0.01575555253847821,n243:0.0006994481965175663):0.003558149255419872):0.00000100000050002909):0.000612727982077602,n384:0.004297081363689839):0.00000100000050002909):0.00000100000050002909,n230:0.0030843698016195017):0.0005223226177201394):0.00000100000050002909,(((n281:0.010839452957555167,(n423:0.0011055785544574375,(n379:0.002857447064997936,((n25:0.0005506087663049796,n368:0.0011027484780935144):0.0005459167666792279,n27:0.00000100000050002909):0.0010900988385643417):0.00000100000050002909):0.0032776309878851627):0.0004351564940075913,((n201:0.00000100000050002909,n316:0.0029971688734304397):0.0002646304907719726,((n154:0.0032647168366502395,(n265:0.00000100000050002909,n266:0.00000100000050002909):0.0010531167264135608):0.00000100000050002909,n260:0.0032671457645038872):0.0016709969303622277):0.0034859272241407175):0.0007731681329681534,((((n417:0.007156357968012659,(((n2:0.004437462228421367,n3:0.009537631705885645):0.0021648277531249346,(n66:0.0011957064954636095,n246:0.004016802622654355):0.0016394156556574615):0.00000100000050002909,((n387:0.0032524698262675214,(n348:0.010134631653741809,(n439:0.0055834999041786395,n304:0.00000100000050002909):0.0010886835716406634):0.00000100000050002909):0.0010825623738804616,n122:0.0017593669754434867):0.00000100000050002909):0.00000100000050002909):0.00000100000050002909,((n310:0.00000100000050002909,n323:0.0045352181284297665):0.00000100000050002909,(n391:0.006854521282683213,n171:0.0033917033877979234):0.0005422859350459943):0.0005409020968467033):0.00000100000050002909,((n447:0.003336987045876532,n252:0.00274339990542763):0.001633137477388036,n324:0.0032976631232264535):0.000540422297658926):0.0017250755851165249,(n276:0.002065886700698883,n344:0.0038638131471021835):0.003640003417550566):0.0003695364968934924):0.00000100000050002909):0.0011388327201634994,n462:0.005778725047162214):0.0009267680665828157):0.00000100000050002909,((((n169:0.0021738649201982607,n172:0.0038978837621587003):0.004451578184618445,(n318:0.01487549051254223,n346:0.008823489091213391):0.00000100000050002909):0.0026477897548097544,((((n320:0.001446787311343987,n403:0.002033240315552979):0.0028829553193269655,n287:0.013011995762246455):0.0012433328407575534,n480:0.00405180906473136):0.0004978490980690957,(((((n174:0.011273093776130864,((n416:0.0005585964034023046,n56:0.0033465410500812887):0.0016681405944048708,(n357:0.006814535856239745,(n100:0.00000100000050002909,((n140:0.002465844019746776,n250:0.00048513190029852944):0.0011915761843175957,n64:0.013339210139852743):0.001436732845715743):0.0005304802913574969):0.0012820261805576122):0.00000100000050002909):0.0009674350973315048,n10:0.005120678801826397):0.0024083555374970326,(((n36:0.0016829454844076073,n367:0.00000100000050002909):0.0005882476328215381,(n337:0.0005494905773955576,(n197:0.002723005294175953,(((n286:0.0011219865434451384,n157:0.000591112106031706):0.0011049020688686942,n472:0.0010443403159737736):0.0003416884546952705,n475:0.000614787955859266):0.00000100000050002909):0.00000100000050002909):0.00000200000100005818):0.0017080257239122354,(((n130:0.005581707423813985,n332:0.004775937246892987):0.0024940890586592317,((n289:0.0017989417466846027,n0:0.0010687707150315144):0.00000100000050002909,n360:0.0011424287959295328):0.00026418865350753324):0.00046335875650790003,(n311:0.010004052014668356,n436:0.0017643405944703272):0.0011383018687321335):0.00020583548444938376):0.00219638262127861):0.0023283180356236935,((n18:0.0005402713446583233,n35:0.0005221534154461584):0.005254728487490841,((n103:0.00000100000050002909,n137:0.00000100000050002909):0.004863279812009227,(n93:0.00000100000050002909,n418:0.0042126092959328554):0.004328901931302084):0.0029461750272500634):0.00000100000050002909):0.0002321453699698393,(((n369:0.001136030995925016,(n414:0.0027992537786495036,(n185:0.00000100000050002909,n267:0.0011021605787614323):0.00000100000050002909):0.0006831722727733134):0.0043430393475187845,((n298:0.010577313913461324,n220:0.003728945001649216):0.00000100000050002909,(n392:0.0072310227515118295,n15:0.003821170687905644):0.0009371470590393419):0.0009880182491489727):0.0005698152263581063,(n152:0.008938399756779307,(n446:0.005671240869064494,(n102:0.0008726411456605445,n109:0.0005447091046112362):0.00000100000050002909):0.003966587583824217):0.0016516446001412397):0.0009527923768496271):0.00000100000050002909):0.00029514706054799175):0.00000100000050002909,(((n305:0.014385473778238842,(((n366:0.004930688713567598,(n134:0.004042939284268756,((n313:0.0005533013799423306,n336:0.00113978887168145):0.00510513116031932,((n443:0.004676378828975435,n445:0.00266567846661911):0.0008379339548334818,n128:0.0038194363020372835):0.0045718921457777355):0.0028666876052848103):0.0011490143068827237):0.000692261153878529,(((n349:0.0016330372319892058,((n383:0.0005916733035046867,n467:0.00000100000050002909):0.0011869195282438263,(n186:0.001842482155715113,(n236:0.005129207525309698,n110:0.0005478347446903542):0.0005324657017583483):0.0027734484314028965):0.00000100000050002909):0.004543042994470469,n83:0.0018711751906080774):0.003292273721883302,n44:0.005657951156529296):0.002146128689636965):0.00000100000050002909,((n94:0.0011035276428158851,((n351:0.004692508006334551,n301:0.005086834753744292):0.00000100000050002909,((n326:0.0016618120425127732,(n194:0.00396517528136883,n444:0.001127072236239479):0.00000100000050002909):0.001104430203808275,n190:0.0032730389163541387):0.00000100000050002909):0.00000100000050002909):0.000779533312117186,(((n247:0.0007797697652522038,(n307:0.0005973383330577077,(n85:0.0012153476669764078,n415:0.00000100000050002909):0.0020265597138501134):0.00000100000050002909):0.0011799730834221515,(((n163:0.00000100000050002909,(n192:0.00000100000050002909,n113:0.00000100000050002909):0.0005480299437723832):0.0016448651289707504,n382:0.002796939536604584):0.00000100000050002909,((n471:0.004927016920441984,n19:0.0009786687030856529):0.0015070229366481633,n254:0.002752024974803948):0.00000100000050002909):0.00038674852337562774):0.00000100000050002909,(n96:0.00000100000050002909,n108:0.0018262048844682104):0.0036253768372510277):0.0013302783396478537):0.0020015392005240974):0.0008863101210303564):0.0006765058171195419,(((((((n9:0.01030685710741155,n52:0.005035927605297712):0.002139997368648884,n155:0.006639067984794926):0.00000100000050002909,((n69:0.00000100000050002909,n75:0.00000100000050002909):0.0038377397170346206,((n199:0.001249360943373674,n187:0.00000100000050002909):0.0033686845959250682,(n358:0.0008853870685388818,n138:0.0009741116453036207):0.00037715200771651494):0.0002951216608167839):0.0005864787482067752):0.0005995668021545129,n451:0.00896788805052954):0.002115974338245086,n88:0.01198649598116858):0.0024880736110068488,((((n204:0.00000100000050002909,n206:0.0005722824707783393):0.004362966747967914,n127:0.008277434545723907):0.00000100000050002909,(n168:0.009223327000966055,((((((n228:0.005221391244808261,(((n212:0.0004939961873004642,(n115:0.00000100000050002909,n119:0.0005757653610143742):0.00000100000050002909):0.0009866642866848353,n284:0.004159057941926493):0.00000100000050002909,(((n34:0.00000100000050002909,n398:0.00000100000050002909):0.00000100000050002909,n424:0.00000100000050002909):0.004062356479511423,((n135:0.00000100000050002909,n70:0.00000100000050002909):0.00000100000050002909,n231:0.00000100000050002909):0.0053608930295810505):0.0005934632044726024):0.0005176084932028345):0.00000100000050002909,n153:0.004053926116949448):0.00000100000050002909,(n46:0.0016691783858190003,n112:0.00000100000050002909):0.0005539171936160576):0.00000178231017925015,(n280:0.0019753226425817685,((n111:0.0016482002504176877,n182:0.006363810369730382):0.00000100000050002909,n359:0.0005452756305060671):0.00518810835964535):0.00017559845451613717):0.0002998520775558391,(n464:0.0023687708926850627,n317:0.002380277354903958):0.000592918644995822):0.00000100000050002909,n476:0.0005786465744780649):0.0007327584440706678):0.0011788065717346673):0.0007974146574043396,(n334:0.000593360124788167,n460:0.0012042660540765634):0.005596866144854523):0.000168329940744644):0.00034884090045359016,(n177:0.01126599051715044,((n120:0.0018569401209239601,n399:0.0006205694731993856):0.004277132882939214,((n37:0.003288672233007886,n54:0.0010842499915944014):0.00000100000050002909,n188:0.0018167026489074357):0.0010834384464260753):0.0003333687096349588):0.0014641151183041917):0.00000100000050002909):0.0008718050694690385,(((((n48:0.0015342713365872943,n202:0.0014742042706633663):0.002577468380518143,(((n158:0.0016258002278368314,n321:0.000526881239638582):0.0032563891279269092,n356:0.0011251022151918077):0.003245221515768593,(n150:0.0022017095770130645,n63:0.00000100000050002909):0.0005414677406211651):0.00000100000050002909):0.001689993388152635,(((((((((n7:0.0014242139797885187,((n170:0.0027464848689292857,n217:0.0005458359406869764):0.00000100000050002909,n361:0.001121693305393934):0.0016287473606462573):0.00000100000050002909,((n262:0.002589916163665377,(n125:0.0011156474312329476,n338:0.00000100000050002909):0.00000100000050002909):0.00000100000050002909,n133:0.00000100000050002909):0.004675068788835176):0.0015697868592936472,n39:0.005067085624879564):0.00000100000050002909,(n43:0.0033755977114061754,(((n214:0.0027423721736082726,n175:0.004785871469846842):0.0009487375184809732,n136:0.00000100000050002909):0.002565494538066509,n229:0.0010884839898073486):0.0005957838790787056):0.0017823811195465612):0.00000100000050002909,((n396:0.0006408295477332725,n144:0.0005580249407312052):0.003843524260734031,(n380:0.001117713672399063,n218:0.0005824289235527881):0.003878040764969193):0.0005392361939234068):0.00000100000050002909,(n71:0.004484486784803357,n142:0.000550352867427027):0.0010802148489695064):0.0008834159345533382,(n355:0.0037632479739799166,n469:0.016642383053976174):0.0022630611746623057):0.00000100000050002909,(n372:0.010770555398813941,n162:0.012486147650355514):0.002013546188815977):0.00000100000050002909,(n41:0.0013572387784278053,(n390:0.003935827029334787,n263:0.0027392301322880595):0.0038419009009743343):0.0031640463811813072):0.00000100000050002909):0.00000500856814866866,n5:0.021954793937573984):0.0003948477719756251,(n226:0.0037680019215649914,n291:0.0075722516378865365):0.002238592890333514):0.00043192713204917696):0.0005180764354789765):0.0001871484001316956):0.00017457409037555026):0.00000344090228884223):0.00000100000050002909):0.00035904948245889446):0.00035676003693000866,n283:0.0048816877988122325):0.00036948237002270553,(((n222:0.020863420328289854,(n139:0.0034729085700718927,(n195:0.004713240194239275,(n278:0.0022030793395241824,n84:0.00000100000050002909):0.0028782772451608307):0.0018465320330718566):0.0013488205776769106):0.0012182836396986752,((n315:0.004167159937150544,n80:0.00596304210997152):0.0012658208442262336,n288:0.004224723719158804):0.005498866831380923):0.0005479307162009894,(n146:0.0006543608627934031,n82:0.007107236077946904):0.0060357107254825244):0.0005345182937681859):0.00000100000050002909,((n397:0.00000100000050002909,n422:0.0008791327276093367):0.003823927061077671,((n105:0.007976423748940925,(n432:0.003468034349201676,n67:0.00000100000050002909):0.002423075534485669):0.0032330328985278093,(((n453:0.0018682353407721676,(n331:0.00000100000050002909,n31:0.00000100000050002909):0.0016401674248974296):0.00000100000050002909,((n17:0.008495856824981014,n277:0.0011020392947754933):0.00000100000050002909,n51:0.004390775041827838):0.0014885330203983566):0.0005242881474496547,(n292:0.007591998700453628,((n213:0.0046476268253666094,((n319:0.0017099976753366846,n420:0.003285201731876232):0.0027262626009170966,n400:0.009574383529227664):0.00000100000050002909):0.00035381385896372206,(n77:0.002796436003840746,n402:0.0010199491952223787):0.0035619774008401016):0.0014048450978504145):0.0002005776058360776):0.0002318809689361901):0.0011716696525532952):0.00000100000050002909):0.00017190199375507578):0.0009037824598701519,n448:0.004825028562525793):0.0004103645534145049):0.0009162404454727706,n21:0.006870687718156257):0.0027921568020355197):0.0018479397251993529):0.0005824892977794733):0.0036157742437232794):0.0012822383552350328):0.035007301836504495):0.007390075895155622):0.05177150889636308;
	TREE 'Imported tree 10++' = (n114:0.05485782163023052,(n65:0.07770159198706325,(n393:0.013316258001479099,((((n279:0.016067981362310923,((n463:0.0029874603175514074,n264:0.0051093482911345346):0.0044451766780660585,n385:0.010126001604085133):0.0025183297111838):0.002745622494881059,(n86:0.017869463531706795,(n431:0.009475148593732406,n253:0.008487551023290407):0.003064519287242839):0.003694409550178287):0.0008353793280616725,(n406:0.018894463236673747,((n430:0.013221871513507509,n143:0.012434298287232415):0.0008147708090328865,n74:0.011975177145379521):0.002330607248222728):0.0005486401478754484):0.0019133088120388728,((n87:0.012529229136520572,n257:0.01097905400078653):0.006411322662048027,((n33:0.012754925077550706,((((((((n165:0.002995320686399469,n49:0.0025090022163351587):0.0008515269328830415,((((n282:0.0012863603229623126,n40:0.0012027624618222304):0.00000100000050002909,n325:0.005774499256605528):0.0009168592508067632,(((n312:0.0011979321125889636,((n409:0.003474643005227478,n53:0.002627271136213936):0.00000100000050002909,n219:0.005328184185417991):0.00000100000050002909):0.0011872726192769503,((((n191:0.004523755027904724,n370:0.00000100000050002909):0.00000100000050002909,n180:0.0003316002930622743):0.0006091321360687399,n104:0.0031391656476562756):0.0003005401685589174,(n362:0.005786157256936677,(n410:0.00000100000050002909,n408:0.00000100000050002909):0.0023889194719928985):0.0006013398298850936):0.00000100000050002909):0.00000100000050002909,(n407:0.004192158885644799,n22:0.005150872536880135):0.00039889692520376417):0.00000100000050002909):0.0008422355067959582,(n256:0.005550891839221742,n205:0.0012371584301567485):0.00000100000050002909):0.00042244109801782586):0.00000100000050002909,n268:0.0036791503109542922):0.0014191882605773655,(n272:0.011728092019351722,((n196:0.0077255916381840485,(n437:0.0040678986880888154,n42:0.0012399663946995115):0.0020226655559824145):0.0013157296283305125,n395:0.0122311738457754):0.0004516373557058126):0.002625842012564459):0.0004055358874398868,((((n132:0.00915827846626421,n198:0.002125304440377146):0.0017015133294162512,((n203:0.009781880910692434,n427:0.007153551621712564):0.009849326729260614,((((n164:0.0020608373173839323,n365:0.00000100000050002909):0.0013656196473790629,(((n126:0.002582728508848903,n173:0.0019283431281416667):0.0019099186063467539,(((n30:0.003847911566172177,(n375:0.0010271881270651902,n371:0.0010312242150129869):0.001547959303552898):0.004739503259889372,((n452:0.005126846721759602,(n97:0.0064900452243485465,n293:0.004582836917204388):0.0015513380985026084):0.0002234791198995363,n28:0.009452935347160228):0.00001459179230984628):0.0005275196092266928,(n11:0.010362977007399776,n352:0.0024695952485041793):0.0010355014133025823):0.00000100000050002909):0.00000100000050002909,((n419:0.0075278240344238264,(n131:0.00000100000050002909,n435:0.0052879925523059):0.0005962627358895939):0.0005899499442428712,n149:0.006095922908695963):0.0002911231028014753):0.0005610851143356083):0.0006425968899636981,((n426:0.0046548909684371274,n479:0.006525256879613869):0.0021668632124597566,((n394:0.002591288575882154,n156:0.005504676805814337):0.0030756962596993342,((n342:0.00000100000050002909,n234:0.00000100000050002909):0.00000100000050002909,n221:0.0006048596269909822):0.002908304468511701):0.00206085110384499):0.0008674823867233896):0.00000440225737242085,n12:0.00569956572199827):0.0007684912127072668):0.00022782826238363488):0.0009038609950882255,n478:0.0076684007132103195):0.0008408397955167464,n62:0.004709667975420539):0.00128764302948736):0.00017953331509599154,n227:0.005663409100977358):0.0009033557020066279,(n448:0.004861698251676581,((((n105:0.004846859834291574,(n432:0.005542882606519654,n67:0.00000100000050002909):0.002493041463616688):0.005048030796978935,(((n292:0.005889323467951236,(((n331:0.00000100000050002909,n31:0.0018095030421420247):0.0039282756567288616,(n277:0.0015681770607952597,n51:0.004868990174206063):0.001150599217990537):0.002576368173339665,n453:0.0031522666211969853):0.00000100000050002909):0.0007032057564160816,n17:0.011801149958626883):0.0015807074298759213,(n213:0.008173792514519666,(((n402:0.000780126835960617,n77:0.002769662393129342):0.003474226140021399,(n420:0.0031445216697505115,n319:0.0022434532448312797):0.0017645219264435085):0.0007587552667606013,n400:0.008437182327292774):0.00011695198592643973):0.001144238347036423):0.00015796839169404312):0.0004822971211983846,(n449:0.008434872234660351,n283:0.003937557308391346):0.0007292826298081642):0.00000100000050002909,(((n146:0.00047102088163858874,n82:0.004248871824942819):0.006592100435740573,((n456:0.0011443075115899755,n411:0.0043197842636038776):0.003687280734882915,(n290:0.0035077625762170174,n215:0.004008072427190285):0.0027692342326946177):0.00000100000050002909):0.00025772864798677246,((((((n72:0.005172079992941581,(n58:0.0028316687285783477,n473:0.0009780346776183072):0.0026707626952677758):0.00056520389110963,n106:0.007168513861416679):0.00000100000050002909,(n327:0.0023418343268709887,(n329:0.0034870146967746684,(n300:0.00000100000050002909,n295:0.00000100000050002909):0.0017629138849372204):0.0070049797497892165):0.00000100000050002909):0.0011315577164581053,(((n57:0.0025379079615442213,n121:0.002324609399921234):0.0011557818914002638,(((n339:0.014396632373717846,n401:0.00000100000050002909):0.0023808516265149,n1:0.006573487589652159):0.002938435939777522,((((n81:0.002427889129291856,(n322:0.00000100000050002909,n216:0.0005929831001488116):0.0006004881500690251):0.0005976755698858022,n208:0.00540754435928893):0.00000100000050002909,(n235:0.0011656861438989507,n347:0.001144257998763794):0.00000200000100005818):0.0015455770274993075,((n296:0.0024231690992636153,n271:0.00824323242393295):0.00000100000050002909,(n92:0.003780111397773798,n275:0.007723393574023158):0.0011948109879724713):0.00000100000050002909):0.0007756787981138504):0.00000100000050002909):0.0011659521933658767,(((n90:0.002513717040708593,(n181:0.0031010972668599136,(n107:0.0017471406230941439,n386:0.00000100000050002909):0.00000100000050002909):0.00000100000050002909):0.00338417864254643,((n91:0.00000100000050002909,n378:0.00000100000050002909):0.007983003549201617,n343:0.0054317266091486825):0.001317099823254656):0.002191509016179313,(n299:0.007477832613369145,((n374:0.011408557696888597,(n59:0.0003642303347326221,n461:0.0024818894464692497):0.005022194495211201):0.0013375880824074977,(n308:0.002956257189451538,n178:0.00421197364925454):0.007003967988054889):0.00000100000050002909):0.00000100000050002909):0.0006427755559279175):0.00019605625934769816):0.0013662817824491517,((n330:0.009025181127585831,((n428:0.003527303739032412,n179:0.0020625572049414046):0.008260504322401411,(n101:0.005172366410333575,(n38:0.0022740544666205132,n413:0.0059163561086172526):0.0002475591218245194):0.0009724883990421362):0.002080315064782825):0.0005002147561584588,(((n315:0.008647367527472654,n80:0.0071289702302275194):0.007816869738831705,n288:0.00485772920361644):0.003590150164071096,((((n8:0.007564018930793693,(n169:0.003885148358907992,n172:0.003316370316522419):0.007110132620394675):0.001920688147714359,((n162:0.013238894230746277,(n154:0.0038305373070663265,(n316:0.007089006772529789,((n260:0.0017311041030979456,(n265:0.0009708331095404685,n266:0.00000100000050002909):0.00000100000050002909):0.0005717497533298972,n201:0.0019164199811456321):0.00000100000050002909):0.0005538823089565238):0.0022159434718542472):0.00000100000050002909,(n281:0.012127713408234956,(n423:0.0035453982232586836,(n379:0.0036133379429236904,(n25:0.00000100000050002909,(n27:0.00000100000050002909,n368:0.002347150689364213):0.0005767231093010098):0.0005766824474615487):0.00000100000050002909):0.004107027778856879):0.0021405355567026005):0.000978864592165303):0.00000100000050002909,((n318:0.01262604534972596,(((n469:0.016878640203260405,n251:0.009507127143850264):0.0001079627010878943,(n248:0.00000100000050002909,n129:0.003184710358053881):0.004439101908117586):0.00000100000050002909,((n297:0.005297132769036833,(n270:0.00000100000050002909,n274:0.0015551501874707073):0.0010857178134613603):0.0016410382062870732,(n183:0.00000100000050002909,((n99:0.0011515187277019428,n200:0.0006172792794173381):0.0011440465989410583,((n98:0.011048440392194037,(n245:0.0011484164193305561,n285:0.005039609582895273):0.00000100000050002909):0.005174426868409106,n442:0.0034558066696195526):0.0008407645321766044):0.00039995202028219874):0.0024069431978779626):0.0008078695977530398):0.00000100000050002909):0.0005355747452219082,((((n328:0.0044585581266657825,(n60:0.001831528023826192,n225:0.004594405968394961):0.006107505000546518):0.0012127219718996575,((n55:0.005921728206485666,n335:0.007388166857855115):0.0023284508193321643,(n353:0.006716804821056995,(n421:0.003976771448889576,(n242:0.00000200000100005818,n429:0.0008941217849827119):0.0061239789243206335):0.0014149456118835813):0.000448522159201904):0.00000100000050002909):0.0004288486301592116,n240:0.004224589261156639):0.000214350064650256,((((((n95:0.008381044693676312,n166:0.003903633256482579):0.0016260488066019102,(n480:0.0029221153341309138,n287:0.015098400075646818):0.0023631729146487653):0.00000100000050002909,(n320:0.0018090386398300971,n403:0.002867616565721212):0.002856953093335489):0.0016399660286405045,((((n389:0.009498797654253849,(n373:0.002521490046058439,n151:0.010714917046365464):0.002285878361607671):0.0008902491789525986,n459:0.004097686467045402):0.0007685081072463207,(((((((n100:0.00039114789116333784,n64:0.018867213885078175):0.0024436521804751424,(n140:0.0010007659821426847,n250:0.0025057607857196466):0.0022289546073309577):0.00020136551494598728,n357:0.006556131790638586):0.0009295716649717827,(n10:0.0048087743212253346,(n416:0.0007625580887834092,n56:0.0033212417361771465):0.0018159711441535615):0.0011557573173095483):0.00000100000050002909,n174:0.006473141616558813):0.002063802664705814,(((n436:0.0012609950996118808,((n130:0.012471753442682488,n332:0.003569651172612676):0.0021006112157129467,(n360:0.00000100000050002909,(n0:0.0008089160913539071,n289:0.0012835525144556635):0.000541905422499369):0.00027112196086762053):0.00022862031099490533):0.00000100000050002909,((n36:0.0012011547352327643,n367:0.00000100000050002909):0.001373896892542289,(n475:0.0012890501329719593,(n472:0.000251762682872324,(n197:0.006984487594099277,((n157:0.0006235211977089857,n286:0.00000100000050002909):0.0005862519616601444,n337:0.00000100000050002909):0.00000100000050002909):0.00000100000050002909):0.0002868765510537208):0.0008653025606090059):0.0010335880329420742):0.002241101271435621,((n103:0.00000100000050002909,n137:0.0017535511319093848):0.00551039182782687,(n93:0.0047827434183712065,n418:0.0033773009381034506):0.00487344651439189):0.0011262161981228501):0.0029001303851137914):0.0018516379221482973,((n346:0.01232325485787655,(((((n188:0.0008191588159642308,((n177:0.012432518420244076,(n120:0.00265479576560103,n399:0.0006528764601318263):0.003926587932253893):0.00000100000050002909,(n37:0.0047390049704603004,n54:0.002351438754462601):0.001129513976800932):0.00000100000050002909):0.0013687164204140387,(n305:0.011942472337816427,(n334:0.0005884257827826184,n460:0.002622440456548995):0.004464905510560412):0.0003272122148350746):0.001174701738294937,((((n44:0.008150970850352856,n366:0.00840878432828857):0.001574823492915768,(((((n94:0.0023807489363122758,(n326:0.0023885629816704124,((n444:0.00000100000050002909,n351:0.003167039926101229):0.00000100000050002909,n194:0.002448853376186287):0.00000100000050002909):0.00000100000050002909):0.00000100000050002909,n301:0.0038564611822826593):0.00000100000050002909,n190:0.0029330783522123565):0.00000100000050002909,((n307:0.00000100000050002909,n247:0.0003876623592474287):0.0018206245377347988,(((n96:0.00000100000050002909,n108:0.002047803645875965):0.0032401898303879967,((n163:0.002941045786175139,(n113:0.00000100000050002909,(n382:0.00119560959033835,n192:0.00000100000050002909):0.00000100000050002909):0.00000100000050002909):0.0011929257770651913,((n415:0.00000100000050002909,n85:0.0012770224855972834):0.0035174333766359598,(n471:0.0024383227945848785,n19:0.0019227955403390193):0.0003973417922708836):0.00035766971956525636):0.0002338325933732489):0.00000100000050002909,n254:0.0065446745250549035):0.00000100000050002909):0.0008023821579853291):0.0003096488808470973,(n313:0.0005908162201593378,n336:0.003691112392839621):0.0035498384710534246):0.0018930785689688793):0.00000100000050002909,((((((n383:0.0006765458403848448,n467:0.0012044092048153854):0.0020242897266135743,n349:0.006402425871016646):0.00000100000050002909,n236:0.011182046117045756):0.00000100000050002909,n110:0.001169094069144172):0.00000100000050002909,n186:0.0006409436227382285):0.0013717876989744967,n83:0.009946623526100339):0.004098017006132017):0.0003169616990284905,(((((n212:0.0013516835598355017,((n228:0.006070956079602646,n119:0.00000100000050002909):0.0007160346046223611,n115:0.00000100000050002909):0.00000100000050002909):0.00043738637730716013,n284:0.004220308473076759):0.001075115664055034,((n153:0.004984951053757758,((n476:0.001841870305736935,((((((n128:0.0024042097057938696,n445:0.002397254036174049):0.00000100000050002909,n443:0.001824214307216865):0.004102914978104216,n134:0.0035638169232277634):0.003907825397264026,((n359:0.00000100000050002909,n182:0.004294496558528248):0.00000100000050002909,n111:0.0007481701117440223):0.007245822660171144):0.001348029153923346,(n464:0.0014971361535563625,n317:0.002184571914972087):0.0009027492228058814):0.00000100000050002909,(n280:0.0033298990697710274,((n231:0.00000100000050002909,n70:0.00000100000050002909):0.00000100000050002909,n135:0.00000100000050002909):0.004810158396213623):0.0010896091295408258):0.00036275071199826304):0.00000100000050002909,(n46:0.0011783159492961789,n112:0.00000100000050002909):0.0005880619474620063):0.00000100000050002909):0.00000100000050002909,((n34:0.00000100000050002909,n398:0.00000100000050002909):0.00000100000050002909,n424:0.00000100000050002909):0.009274256243329747):0.00000100000050002909):0.00033549625700628514,n168:0.009118926129821951):0.00045042351374147463,((n127:0.012234825510849142,(n204:0.00000100000050002909,n206:0.00000100000050002909):0.00578127466854033):0.0006115827359263661,n451:0.006550276186736104):0.00000100000050002909):0.0015823210359643776):0.0006527419908496685):0.00000100000050002909,((n88:0.008548244108817923,(n155:0.007603176436649857,(n9:0.009150318600241845,n52:0.007944098964060618):0.0017157843080611726):0.00000100000050002909):0.00044246196922846984,((n187:0.0012204293674763689,((n138:0.0033175380376664226,n358:0.0016587812467287358):0.0011660631269489639,n199:0.0025657865793213587):0.00000100000050002909):0.00000100000050002909,(n69:0.00000100000050002909,n75:0.00000100000050002909):0.0023656201009665785):0.0002989737558011128):0.0028892346341715075):0.0005180874313566974,(n226:0.008123094589432056,((((((n142:0.0005884561262546457,n71:0.005971319436685415):0.0005678897577902729,(n396:0.00000100000050002909,n144:0.0011873223334784126):0.0017691090571513237):0.00000100000050002909,(n5:0.015354223789389452,((n372:0.015684473046863493,n361:0.00000100000050002909):0.0011768076640747056,n217:0.00000100000050002909):0.00000100000050002909):0.0005848509872844255):0.001758542472422245,((((n136:0.002445101305352011,(n214:0.003948507878664798,n175:0.002958924143229746):0.0008172928443782296):0.0038061793481323943,n229:0.0005703384491724688):0.0011654336132205583,n43:0.011607472263777193):0.0017373386057020857,((n380:0.000590486135363636,n218:0.00000100000050002909):0.0041188218175896045,(((n158:0.0011541858857192328,n321:0.00000200000100005818):0.002145507652663169,n356:0.004892570430565097):0.0008327454383822424,(n150:0.0017686712756291283,n63:0.00000100000050002909):0.003484945791829859):0.0026753866492348487):0.00000100000050002909):0.00000100000050002909):0.00000100000050002909,(n7:0.002014753040159804,(n291:0.008010501700415716,((n262:0.0029959664691386785,(n338:0.00000100000050002909,n133:0.000590022626178775):0.001157705605391737):0.00000100000050002909,n125:0.0017796801385150459):0.00000100000050002909):0.00238715887966549):0.0005326865223041961):0.00000100000050002909,((n39:0.00481869257638576,n170:0.0011674209692947469):0.0017386908378879311,(((n102:0.000297331268397053,n109:0.000580718897753277):0.00034031715458114495,n446:0.006596913858461721):0.006475986167777136,((n41:0.0024910382843115293,(n390:0.0048345102953626234,n263:0.003506582126910085):0.0029035694856696004):0.0018519834980318178,((n48:0.0006191932514244441,n202:0.0005350812446777198):0.006594106924006547,n355:0.004065205283179528):0.00000100000050002909):0.00000100000050002909):0.00000100000050002909):0.0008076756851191028):0.0006557474495835676):0.001072287426151403):0.0004257532393646799):0.0006845513753409162,(((n45:0.014131575793812173,(((n276:0.001447575646481432,n344:0.004687490031814621):0.0019346601132240523,(n324:0.0052692037039270756,(n252:0.0076407432157507595,n447:0.010150354170970922):0.0005471710268194385):0.00000100000050002909):0.0038599159091795526,((n222:0.01800373620578604,(n481:0.012053658093201495,(n455:0.010062436400767967,(n117:0.0018390656696141983,n23:0.01086902134474411):0.0028798657930766084):0.0030426720196394023):0.00000100000050002909):0.0018008287436481671,((((n310:0.00000100000050002909,n323:0.005057746334316575):0.00000100000050002909,(n391:0.0032379015375785776,n171:0.0067491281269749836):0.00234880009947062):0.0017371294606394827,(((n387:0.004049015251669285,(n348:0.00791357253202839,(n439:0.007264409289111626,n304:0.0029568466044551803):0.002929437196117537):0.00000100000050002909):0.0011520366028957936,n417:0.004660715216723043):0.00000100000050002909,((n66:0.0017734412663275789,n246:0.003822479314140989):0.0034598379572092883,(n2:0.004692036926008531,n3:0.010239970620305863):0.0023038996231046585):0.00000100000050002909):0.00000100000050002909):0.0005622862682692128,n122:0.0005940061242893443):0.00000100000050002909):0.0005766240120976044):0.00000100000050002909):0.0007996495284948909,(n309:0.012464462198394859,((n230:0.004519585731416496,(n384:0.00394604466342157,n462:0.005847083008924561):0.00000100000050002909):0.00000100000050002909,(n261:0.0013043320622892036,(n241:0.0011440119150394315,(n161:0.019855551369437636,n243:0.002149315632922507):0.002037752596583102):0.00000100000050002909):0.002451885482789586):0.00044174662189250355):0.0004709094949349775):0.0014179107304617903,(n152:0.010144462419494262,((n369:0.0009787052531643047,((n185:0.00000100000050002909,n267:0.0011714371818742915):0.00000100000050002909,n414:0.0030333595838829257):0.0034217093074317556):0.0038874133968410302,((n220:0.0007347805525903976,(n15:0.0066255281086138335,n392:0.00000100000050002909):0.003619047126273288):0.00000100000050002909,n298:0.007710491998076403):0.0007472435696928053):0.00037234341893046727):0.00341814588505751):0.00000100000050002909):0.00000100000050002909):0.00000100000050002909):0.00000100000050002909,((n18:0.001144159078937796,n35:0.0011176039186923158):0.004766481476265307,n314:0.0011106901719222652):0.0016791192417583561):0.00020846140679275555):0.0002257536408952341,(n244:0.0015959026186664308,n269:0.006199946387597797):0.006579757205581616):0.0002012570608653084,((n207:0.005460385653162766,((((((n89:0.010697277508073607,((n438:0.003912325352747262,n224:0.0038284740502064945):0.001407404688213886,((n50:0.009410414325139425,n237:0.0070617997690107116):0.00000100000050002909,n160:0.007232519586785472):0.00000100000050002909):0.00000100000050002909):0.001387652945222271,(((n364:0.007910382417756049,(n425:0.005021367929850504,(n306:0.0023657522341815214,(n405:0.0006146517132490334,n258:0.00000100000050002909):0.00000100000050002909):0.0017390848902424296):0.003479524866414104):0.00000100000050002909,((n377:0.004789730666209498,n468:0.0014849537693520673):0.002174173176236078,n210:0.006450867659733187):0.0007108442442410651):0.00000100000050002909,((n32:0.0008780310111373156,n211:0.0008587814274266497):0.0018956149433142016,(n78:0.0017968291342956603,n440:0.0018690048946300199):0.0005974081824857033):0.0002591905990680138):0.001249077833762989):0.001810378068362958,(((n238:0.004037003427308886,n255:0.00000100000050002909):0.005213955293365521,(n345:0.011294074782882385,(n450:0.010108854819054177,n189:0.006940366582617713):0.0019998872690841526):0.0017287105926772394):0.00000100000050002909,n209:0.013567159661068563):0.0005744121314833733):0.00005840122345749344,((n184:0.004230875321565172,(n76:0.0012619860523200087,n20:0.001284177215225775):0.009355862131937459):0.020360259006648805,n302:0.00533948376397583):0.0021980013680082734):0.00000100000050002909,(n79:0.005844917827643409,(((n381:0.009729917167864949,n26:0.013316394679831652):0.0016110001418738376,(n441:0.005197745947679354,((n145:0.002382453859210258,n388:0.002889759243582815):0.008953100922516223,(n340:0.00000200000100005818,(n14:0.00000100000050002909,n434:0.00000100000050002909):0.000572979737614842):0.007164878749177796):0.0009617171638517558):0.00000100000050002909):0.0017215871994316978,(n141:0.008002743429561846,n73:0.009361807200293974):0.00000100000050002909):0.00000100000050002909):0.000755710007243125):0.0004278113727420467,n273:0.013240342143061919):0.0004240729906343722):0.000635067128848907,n259:0.00841222170321576):0.00021223574195869516):0.00041136377586943357):0.00000100000050002909):0.00000100000050002909):0.00018947067205411973,((((((n68:0.003832498064471572,((n311:0.012937418868612102,n16:0.008921729464499293):0.0018949032414309894,(n354:0.005839105751542928,(n116:0.0011521079162714228,(n477:0.0017638499814883928,(n465:0.0032014577802960643,n118:0.002699234084032262):0.0022695984751617314):0.0008880574527748533):0.00000100000050002909):0.001819484420351286):0.0013479837871581783):0.0006359660087580387,n61:0.005488482115698707):0.00000100000050002909,n466:0.002271507788349596):0.0007928250042622399,(n239:0.0042093558470533785,(((n303:0.008169496409739305,n458:0.005544850019833257):0.001766831477069301,(n433:0.010272179491252123,n376:0.007121374909751552):0.0014105956634063073):0.002890436559224737,((n159:0.016082355825170803,((n474:0.0013813916111269624,n4:0.004930336905817461):0.0061097667777024346,((n232:0.006541531447878033,(n412:0.0046955296504520875,((n148:0.0017458569873706655,n482:0.0011587819482552907):0.00000100000050002909,n176:0.0010741594250564537):0.0017957396126360697):0.0003533721779651099):0.00000100000050002909,((n294:0.00000100000050002909,n404:0.0012172489587645493):0.004552571654915567,(n333:0.0014274760070890826,(((n24:0.004108514224105,n47:0.0001568789209939027):0.0017356524404061775,n13:0.0023174702058674653):0.00000100000050002909,(n363:0.000984514951386544,((((n350:0.00000100000050002909,n470:0.00000100000050002909):0.0005734324472307425,n457:0.0006127948837883256):0.00000100000050002909,n124:0.00000100000050002909):0.00000100000050002909,n123:0.0011477296380185001):0.00000100000050002909):0.0015943593338788337):0.0012839982180882941):0.00000100000050002909):0.001014573581190831):0.0008554635491036508):0.00000100000050002909):0.0008693098914328067,n249:0.008065979567821133):0.0004106713967994861):0.00000100000050002909):0.00000100000050002909):0.0008628397798799962,(n223:0.009465219979060729,n147:0.003843243466636731):0.0012677991740110163):0.00000100000050002909,(n233:0.00794928191147361,((n193:0.00000100000050002909,((n29:0.00000100000050002909,n167:0.00000100000050002909):0.0066469346057279515,n6:0.00000100000050002909):0.00000200000100005818):0.005395005899188112,n341:0.007547461392868151):0.00030371085680326305):0.0006460042583256789):0.0005064439278368109):0.0008409666555325809):0.00010154760652890418):0.00000100000050002909):0.00000100000050002909,((n397:0.00000100000050002909,n422:0.0017809068415596257):0.001658604861982691,((n195:0.005638120816894542,(n278:0.0041121950735531305,n84:0.00000100000050002909):0.005204616515991083):0.0013325612722819432,n139:0.004179066773625982):0.0039032169800536846):0.0008152725386766271):0.00000100000050002909):0.00000100000050002909):0.0009517255390859815):0.0003714662473438326):0.00001205825145458146,n21:0.003421902485119208):0.00361700960138188):0.002632806699729761,n454:0.012299562809093056):0.0005877490690668461):0.002700076460989363):0.0012640188882228418):0.040819255995829175):0.0094493153910212):0.056374172951496555;
	TREE 'Imported tree 11++' = (n114:0.05523449876274061,(n65:0.07479871035574863,(((n454:0.012931174035340772,(((((((((n455:0.008311208280254775,(n23:0.009953447596970543,n117:0.0035664985384312718):0.0031200672779027236):0.0013901166021157495,(n248:0.0017396754309413481,n129:0.004506192327107191):0.004754051274556229):0.0006802079230331572,((n169:0.005819381754159447,n172:0.004785742238002506):0.0052461240526479845,n283:0.002961474387753254):0.0005539967032635371):0.0007165624890844546,((n82:0.0032120359427869746,n146:0.000611902169027187):0.007670053478910964,(((n297:0.005962739373174681,(n270:0.00000100000050002909,n274:0.0007532837966123076):0.0020747185234132044):0.002088514523020365,(((n245:0.0005570545611624622,n98:0.007082934992641238):0.00000100000050002909,n285:0.0034637752648683648):0.0036560742725477656,((n99:0.00000100000050002909,n200:0.002264847331963139):0.0015675992410285194,(n442:0.002113957773300476,n183:0.00000100000050002909):0.00000100000050002909):0.0015791642176999415):0.00219640535993605):0.0009822012454400115,((n239:0.0035665238428845155,(n397:0.00000200000100005818,n422:0.0008324005947666761):0.002588740479989354):0.0008544903588644422,((n105:0.004407970288389081,(n432:0.002786367215445709,n67:0.00000100000050002909):0.0021938251463288062):0.0028752955490525933,((n292:0.011202810749402175,(((n51:0.004724188435545237,(n277:0.0020985615618645307,n17:0.008416330990681998):0.00000100000050002909):0.0013418580258258343,(n31:0.0010852836410030994,n331:0.00000100000050002909):0.0015715506869779757):0.00000100000050002909,n453:0.0011119430880209586):0.00001588737918314771):0.0018447602138244664,(((n420:0.005313395131556163,n319:0.0036277498483613608):0.0016648450697969131,(n77:0.0038933766066314344,n402:0.0007324194578058199):0.00281564019301544):0.000950333070581491,(n400:0.01485287919198039,n213:0.008361485569026989):0.001333137479918988):0.0023726803400560843):0.00015271298305496368):0.0004918713410411412):0.00033626360766928414):0.0003825669175903996):0.00010921688335664518):0.00041219036643505845,((((((n240:0.002725916055063652,((((n222:0.01809352392913389,n259:0.00435841486578718):0.00000100000050002909,(n244:0.0014279813569204331,n269:0.008936982217002608):0.0038389913526934503):0.00000100000050002909,((((n55:0.008528036766905094,n335:0.006109569416403332):0.0021441625520429086,(n353:0.005892597895651206,n421:0.0021210377956828812):0.0015745942896092705):0.00000100000050002909,(((n225:0.001742574323291901,n60:0.0016803158654601885):0.005506703355725831,n328:0.004410364839022095):0.00042703417663290716,(n429:0.0011042649778455302,n242:0.00000200000100005818):0.0038160118892840234):0.00038499022942078016):0.0001911838221857912,(n207:0.006295998465281965,(((n224:0.00615755501838425,n438:0.005670308769147872):0.003903153175859748,(((n306:0.003768970659225448,(n258:0.00000100000050002909,n405:0.0033737306191824372):0.00000100000050002909):0.0010443218638954816,n425:0.005045136674694917):0.00037929127258902966,((n210:0.007255273672917489,(n468:0.001186604023643709,n377:0.005718634699695221):0.002517579472687996):0.00010776299790317161,((n32:0.004265505275731051,n211:0.00147342078856881):0.000990690316291696,(n440:0.002483042647845054,n78:0.0010855257611876983):0.0006901103107002858):0.00045806266454695167):0.0005628757318617647):0.001732948809543224):0.0008141606649128107,((((n364:0.006788822184349261,(n388:0.0036554309049214966,n145:0.0016053667880312338):0.009943416599624803):0.0016302305101205887,((n434:0.00000100000050002909,n14:0.00000100000050002909):0.001035856910989186,n340:0.0005198514804696477):0.010672129380154315):0.0015236712525231537,(n73:0.0039995544348649,((n381:0.01563391558346063,n79:0.0024891234091030836):0.001028109859138219,n26:0.014382181022209874):0.000691232375151983):0.0003042535881620135):0.0005394885591308095,((n209:0.01003631713806678,n160:0.0054647054699428705):0.00000100000050002909,((n345:0.0136613553538173,((n441:0.004290007098585582,n141:0.009060605241678468):0.000406137618835626,(n189:0.008829277981927272,n450:0.009822429821696645):0.0034475387142472147):0.00000100000050002909):0.0015600604701444445,(((n89:0.012892405696295529,n273:0.008507237418672826):0.00000100000050002909,(n238:0.003689687836785524,n255:0.00000100000050002909):0.0057636551348057155):0.00000100000050002909,(n50:0.006808267985510096,n237:0.005169694581013389):0.0011095642801318183):0.000519030848784794):0.00000100000050002909):0.00000100000050002909):0.0002832677697454464):0.0005388445028872439):0.0010774143071714832):0.00000100000050002909):0.00000748295823415275,n459:0.003782235838415215):0.00044667030224551467):0.0000022611407656021,(n88:0.01015360789096692,(n346:0.00793603493992616,((((n59:0.00000100000050002909,n461:0.004007893071496021):0.0032042149605791105,n299:0.0067442587109921345):0.00000100000050002909,(((((n329:0.002100453085787143,(n300:0.0005257641538214983,n295:0.001624665983965112):0.00000100000050002909):0.006301391032419352,((n327:0.002696045995343997,n162:0.008685892104374312):0.0010812850415848915,(n72:0.004349454197293425,(n58:0.007997171459006514,n473:0.0013117316469406061):0.0017434920140026156):0.00000100000050002909):0.0008587149524295948):0.00000100000050002909,n106:0.004790577329081069):0.0011134024135983811,((n374:0.008370703150335638,((((((((n235:0.00000100000050002909,n347:0.0006975182942252631):0.0013501129506616179,(n322:0.00000100000050002909,(n275:0.006392609877871384,n92:0.0028539407868941914):0.0012777443078639016):0.00046680666087952906):0.00000100000050002909,n208:0.005912934527274253):0.00000100000050002909,(n216:0.000533480861141047,n81:0.0021672218183598387):0.0005263266076474995):0.00000100000050002909,n271:0.004135805830609658):0.0018149844312104642,n296:0.0051059556155899355):0.0025504614238803353,((n1:0.0130758344575239,n401:0.0005578181762543403):0.000543341131714801,n339:0.007621405702777227):0.0009881298549317382):0.00000100000050002909,n121:0.0020950682635945553):0.0008498337655298755):0.00000100000050002909,n57:0.0021106697219172893):0.00038508675766683734):0.0005646035745206843,(n178:0.003829676521441615,n308:0.005011075429502551):0.005568465140880668):0.00032324764230069):0.00000100000050002909,((n343:0.004289071206458032,(n91:0.00000100000050002909,n378:0.003388180713624892):0.003929330195833598):0.0006603635260959972,(n181:0.0011259716619055524,((n386:0.00000100000050002909,n107:0.00000100000050002909):0.00000100000050002909,n90:0.0005539735503970867):0.0009269649964699773):0.0037769312943558824):0.0008258479169577688):0.0003372090269424003):0.0003371437535248485):0.0002087622921548461):0.00017139517001440628,((((n481:0.007480204857270901,(((n226:0.003682340118949932,n291:0.006287629120516603):0.005278057862350514,((n202:0.00000100000050002909,n48:0.0019149715613716316):0.004906708939269676,(((((n218:0.0005486555021715881,n380:0.0010764332975523657):0.005327339281612527,((n142:0.0005256523172539652,(((n125:0.0010765184958445616,(n262:0.000593079952477777,(n338:0.00000100000050002909,n133:0.0010742311803092503):0.0015854002893347383):0.0011841023310592688):0.0017688602531316386,((n5:0.021038559159961598,((n170:0.0032043853600141497,n217:0.0005126670559426569):0.002134594752742214,n361:0.001116619083171592):0.00000100000050002909):0.0011784212531714758,(n144:0.0016290642483114673,n396:0.00000100000050002909):0.0032353628326960643):0.00000100000050002909):0.00000100000050002909,n7:0.00000100000050002909):0.00000100000050002909):0.00000100000050002909,(n39:0.00327306451196782,(n372:0.01221267245236868,n71:0.005681141011181027):0.00032000603807673796):0.00000100000050002909):0.00000100000050002909):0.00000100000050002909,(n43:0.0044667014990909856,(n229:0.0010563698227678082,((n175:0.0020473837966426107,n214:0.0026840456566964376):0.0007124343455585669,n136:0.0011189574217106489):0.0036355801178771362):0.0005479737447439229):0.0016544088844503322):0.0012643735488174531,((((n321:0.00000100000050002909,n158:0.0010487291816513578):0.004069796458629579,n356:0.004378193477546422):0.0015255796535162164,(n150:0.001580652528927825,n63:0.00000100000050002909):0.0005221553109149785):0.00202815901142786,(n41:0.005221716096078238,(n390:0.004134727846150705,n263:0.0029412278821085436):0.004681347859258243):0.0008887429173459596):0.0028298538723245162):0.00000100000050002909,(n469:0.010291238621025054,n355:0.0020959236499616617):0.0010572714067509548):0.00000100000050002909):0.0024208397883805897):0.00046763566968932466,(n8:0.006455497279147298,((n403:0.0011736702663436888,n320:0.0027259316174861443):0.0037197451884361,(n166:0.007697121554259193,(n480:0.005316152190132607,n287:0.00998006742320025):0.003060700673438832):0.0007352318473976583):0.0006103499484063511):0.0006030076034735344):0.0011226496818386403):0.00000100000050002909,(((n418:0.00797185932439393,n93:0.0009759628615831895):0.003815958216601781,(n137:0.0007452812212820729,n103:0.00000100000050002909):0.00472207608666759):0.0034380310289427165,(((n369:0.001672969965474338,(n414:0.0010749748937506074,(n185:0.00000100000050002909,n267:0.0010610058664353554):0.00000100000050002909):0.0010464203870282243):0.003181840419436587,((n15:0.0047407988256472616,n392:0.004272102018989659):0.0013578808148268103,n220:0.0005860377816404723):0.0031487006984356088):0.0003238757755960662,((((n102:0.00035697894068618713,n109:0.001578517245848614):0.00000100000050002909,n446:0.006587858299910767):0.002518189526401658,n152:0.006417467765286645):0.002042952393965883,n298:0.005354540826156539):0.0007958255032634813):0.000894477914786358):0.00035983463010831455):0.00000100000050002909,((((n311:0.009478272348744592,n436:0.0009761864092681127):0.0009607020927419157,(((n367:0.00000100000050002909,n36:0.00000200000100005818):0.0005593560055420449,((n337:0.0005266600720392398,((n472:0.000728766779645195,n475:0.00000100000050002909):0.00000100000050002909,n197:0.0031409793394608257):0.00000200000100005818):0.00000100000050002909,(n286:0.0016219333931716622,n157:0.000570620945001694):0.0010577149828723857):0.00000200000100005818):0.0003824337600678215,((n332:0.00371822219114487,n130:0.008579619042796811):0.0027649848393675597,(n360:0.0005398414803638858,(n0:0.0010799803379487193,n289:0.0005749599567029423):0.0005390577153135219):0.00000100000050002909):0.000804422046485643):0.00000100000050002909):0.0026281383547543755,(n10:0.003825844525667984,(n174:0.005505715232630609,((n357:0.007706772655764005,((n64:0.020426148138911113,(n250:0.0004654812165376032,n140:0.002823349924522565):0.0009372774287720251):0.0012483573656991238,n100:0.00000100000050002909):0.00000100000050002909):0.0015411038450497993,(n56:0.0021260053457765635,n416:0.0018626279280092972):0.0025168338330983724):0.00000100000050002909):0.0007694553486270832):0.002297633904754824):0.0024418863966383492,((((((n313:0.00000100000050002909,n336:0.003941775580303041):0.0032140090099006674,((((n415:0.00000100000050002909,n85:0.002544644557594231):0.0025489123918825854,(n307:0.00000100000050002909,n247:0.001535842241064724):0.00028905952771327345):0.0016975441905876436,((((n471:0.001902670071796386,n19:0.00000100000050002909):0.0013191468156014444,n254:0.003792807795652611):0.00000100000050002909,(n382:0.003821922615516791,(n163:0.002149296599791542,(n192:0.00000100000050002909,n113:0.00000100000050002909):0.001092552703547893):0.001088946016624668):0.0005435159731226921):0.0014771601307014695,(n108:0.001182252130912739,n96:0.00000100000050002909):0.002363371751900082):0.00000100000050002909):0.0006438547244730285,(((n190:0.0023560538828628482,n94:0.0005402543495001048):0.00000100000050002909,((n194:0.005601393066150504,(n326:0.003275095501028606,n444:0.000555305437021369):0.001088000962311086):0.002175850613032758,n351:0.007666251716446302):0.00000100000050002909):0.00000100000050002909,n301:0.004503990385027623):0.0003889414935053863):0.0011251380842416537):0.0013811754938881193,(((n83:0.003999169759961773,(n349:0.005280572039909778,(((n186:0.0005668058461753557,n110:0.0005282889874782803):0.00000200000100005818,n236:0.0055424598594854225):0.0010515399189742962,(n383:0.00000100000050002909,n467:0.0010877320142676382):0.0014276660371322478):0.00000100000050002909):0.002495338938883652):0.002085398712601551,n44:0.0046768554119819335):0.0024263324143485566,((n366:0.005376384360832483,n134:0.002394840048933959):0.0003767985479943269,((n443:0.0028369488978700077,n445:0.0029574392031606633):0.0005166649690420823,n128:0.00347704897435877):0.004605210978418556):0.00032261751407037766):0.0007735359601203731):0.0002615502764811404,(((n182:0.00607227154424822,(n111:0.0008563580611164003,n359:0.00000100000050002909):0.00000100000050002909):0.0036579470425679474,n280:0.0025187150419152416):0.00042035067750860916,((n464:0.0019784452883041584,n317:0.00425086739701678):0.0011350885615309465,(((n168:0.011643212288808526,(n476:0.0027650035165427923,n127:0.008746384727463074):0.00000100000050002909):0.00000100000050002909,(n206:0.0005558811210965926,n204:0.00000100000050002909):0.00579560264792383):0.0005996219995422085,((n153:0.0068609286135496135,((n228:0.005011074382245995,n119:0.00000100000050002909):0.0006655193250592938,(((n424:0.00000100000050002909,(n398:0.00000100000050002909,n34:0.00000100000050002909):0.00000100000050002909):0.0028243749143514263,((n135:0.00000100000050002909,n70:0.00000100000050002909):0.00000100000050002909,n231:0.00000100000050002909):0.005414055922609334):0.0006229209892183415,((n284:0.002262223751359896,n212:0.0008461834917924798):0.00000100000050002909,n115:0.00000100000050002909):0.00000100000050002909):0.00000100000050002909):0.00000100000050002909):0.00000100000050002909,(n46:0.00107375845412077,n112:0.00000100000050002909):0.001074212364400431):0.0009335908308510764):0.00000100000050002909):0.0002771428779403164):0.0016653601836450788):0.0004010138643635922,(((n177:0.013520020768817769,(n188:0.000681264312019292,(n54:0.00000100000050002909,n37:0.0047285189932814746):0.0005201865459946261):0.0004005638610692189):0.00035505990372093925,(n399:0.0006247371895319907,n120:0.0005969860222161176):0.004815049028732912):0.0017434231526652513,((n460:0.00000100000050002909,n334:0.0005814841842384504):0.0041911984784770906,n305:0.009657111774892339):0.0004963174282036884):0.002073373112695174):0.00000100000050002909,(n451:0.004271231807100991,(((n9:0.010390138791576029,n52:0.005068617114095607):0.0020057887280356497,n155:0.005902923647797942):0.000266685238873383,((n358:0.0012201533380222112,n138:0.001345961537109598):0.0014392990729931504,((n69:0.0005723969210785566,n75:0.00000100000050002909):0.0039637219170162745,(n199:0.0011895715901725757,n187:0.0016548818313110605):0.001076185229532283):0.0005043657616949334):0.0005564134818866237):0.0002936616696796291):0.0033679679861100703):0.0009981924771351684):0.00000100000050002909):0.0005068160496505974,((n95:0.008561705657195313,n251:0.0026838817870660065):0.002410968194142658,(((((n45:0.01139109681311926,(n423:0.0031896987087972777,(n379:0.0010799063975675937,(n27:0.0005244084845311986,(n368:0.0015851526493700662,n25:0.0010589645373953215):0.0005236988357848763):0.0010467043467968938):0.00000100000050002909):0.002718046275356136):0.00039869363001224565,n122:0.004885783632607452):0.00000100000050002909,(((n260:0.0020859698322414416,(n265:0.0008549616881166668,n266:0.00000100000050002909):0.0004569204798002241):0.00000100000050002909,(n316:0.004706703531774799,n154:0.003242510181110465):0.0015989657549949768):0.0005642801060411608,n201:0.0011685203404141597):0.0042080535323925135):0.00000100000050002909,((n387:0.0042087126944868325,(n348:0.01001864333568244,((n281:0.010032777047437238,n304:0.0005553039262830321):0.0005416860177445816,n439:0.004869595578029564):0.0005608221320478583):0.00000100000050002909):0.0016524119578802655,((n3:0.009747129987518558,(((n2:0.008082326826726605,n66:0.0011485813764520324):0.00000100000050002909,n246:0.001097977539248105):0.0010463813208869788,(n323:0.004989798607800691,(n310:0.00000100000050002909,(n171:0.006587090833186223,n391:0.01080803560174078):0.001090919117026223):0.00000100000050002909):0.0014488993370982389):0.00000100000050002909):0.00000100000050002909,n417:0.009042712979011295):0.00000100000050002909):0.00040617707559592294):0.00000100000050002909,((((n261:0.003031015896783146,(n241:0.00104118526686839,(n243:0.001762163950830357,n161:0.016222560555524092):0.0020352215028274223):0.00000100000050002909):0.0016466510209820165,((n230:0.005895236961724933,n462:0.004223537443334522):0.00000100000050002909,n384:0.0025635561476022015):0.00000100000050002909):0.0010523363679658922,n309:0.008517046933228068):0.00000100000050002909,(((n344:0.0021317179794838347,n276:0.0036175988656494545):0.0019941851505624816,(n324:0.0031745987663046944,n447:0.0037333127532780553):0.00000100000050002909):0.00000100000050002909,n252:0.0037122215242885617):0.0007929498042032706):0.0007566499844089531):0.002741123505726533):0.00000100000050002909):0.0007038558456420901):0.00000100000050002909,((((n318:0.011441794351292806,n449:0.005629159082948192):0.0003611616696545873,(n389:0.005446969515830096,(n151:0.00505390990101798,n373:0.004917287476357043):0.0014107800025144218):0.000973487457811528):0.00000100000050002909,(n330:0.007502168391975566,((n179:0.003289459222923811,n428:0.00200610294523252):0.010060997757427598,(n101:0.0072751113066644,(n413:0.004244843220319784,n38:0.0019338062415639882):0.00000100000050002909):0.0004654563244823641):0.0012289751465927878):0.00047776623527762043):0.00019347396514600085,(((n302:0.0035205521253615637,((n20:0.0036501277099886993,n76:0.00000100000050002909):0.004487910064544694,n184:0.007647008760296562):0.01425825270923773):0.001724429223490269,((n290:0.0021198148005680817,n215:0.0011960657084601149):0.0036897299484734023,(n456:0.0010377008213873077,n411:0.008583302755998836):0.002847365870372663):0.001415017403313849):0.00000100000050002909,(((n233:0.008941600101943272,((n193:0.00000100000050002909,(n6:0.00000100000050002909,(n29:0.00000100000050002909,n167:0.00000200000100005818):0.00447496937229047):0.00000100000050002909):0.0052799763375932195,n341:0.00896223959304195):0.0008550911483556513):0.0003814344198392198,(((((n139:0.004283005715322742,n195:0.0037833722390198782):0.00027077059040168635,(n84:0.00000100000050002909,n278:0.0010548469671893168):0.0016058373806946264):0.004129768177297503,(n376:0.006410758713434019,n433:0.0025106395639622257):0.0012114375565453767):0.00000100000050002909,(n458:0.0021927942881714035,n303:0.009254421660497938):0.0027454503594114134):0.0014562712899497776,((n61:0.004967324544603694,(((n4:0.003901481277240062,n474:0.00000100000050002909):0.00189011618435956,((n404:0.001670966457933376,n294:0.00000100000050002909):0.0013814580943015567,(n333:0.00000100000050002909,((n13:0.00262557523450649,(n47:0.00000100000050002909,n24:0.00000100000050002909):0.004318533214151965):0.00000100000050002909,(((n350:0.00000100000050002909,n470:0.00000100000050002909):0.0010464800470637971,((n123:0.0015763158780749435,n124:0.00000100000050002909):0.0010473346467443849,n457:0.0021619447118600183):0.00000100000050002909):0.00000100000050002909,n363:0.0015146271906602336):0.001531333193970153):0.0002633052004758097):0.00000100000050002909):0.0008864393961744294):0.0009504141388687357,((n466:0.0017412236243864916,n16:0.014044397856806516):0.0006689337959532282,(n249:0.008350314274722704,(n232:0.0037805233855321132,(n148:0.001578242133614048,(n482:0.0010497811768772245,(n412:0.00586135604219963,n176:0.000694830210088799):0.00000100000050002909):0.0010426987519850852):0.0017483104461746453):0.0005802406117875577):0.0002663384483224893):0.0026957819851893394):0.00000100000050002909):0.0008069204757541887,((n68:0.0026271408996516267,(n354:0.007440977419631766,(n116:0.0010494515206733504,(n477:0.0005275285850870461,(n465:0.001733884720468892,n118:0.002326731911086949):0.0009296911905803872):0.0004608761685080089):0.0014021514836328815):0.0023003023391403843):0.0013911500863792578,n159:0.01407843576828797):0.00000100000050002909):0.00027417307429231493):0.00000100000050002909):0.00000100000050002909,(n223:0.00910177786965924,n147:0.003306832097321873):0.0014696089692550751):0.0006656837927042763):0.00000100000050002909):0.000510119104644134):0.00040077830641503247,(n288:0.0035414237887135647,(n80:0.003385338295027166,n315:0.005175490899160623):0.004259507249711569):0.0018406518930317059):0.00002162124587943343,((n35:0.001525156948503644,n18:0.0010428149418025934):0.004463339450787084,n314:0.002559214804246298):0.0011311437737929197):0.00000100000050002909):0.0015628602431635946,((n227:0.005994041949786111,((n478:0.0070228727117950356,((n198:0.004792503902587894,n132:0.006847872476691472):0.0020119746780625845,((n203:0.006098219326546477,n427:0.0020468645802502452):0.00826387150871636,((n149:0.006535095919956009,((n11:0.00665152625746003,n352:0.0023561089382643768):0.00045477673713313296,((n97:0.0032034436247455364,((((n126:0.0025630406286879914,n173:0.0011118227275336613):0.0012345280482100182,n293:0.0036517245018334483):0.0003163682573620542,n452:0.004755257062339663):0.00000100000050002909,((n419:0.004880699536477724,(n435:0.003682948370730837,n131:0.002126120156253497):0.001036949136748511):0.0007719009920321961,(n375:0.0023738218748907644,(n30:0.005078554906259799,n371:0.0005118537932963529):0.0015723095757801124):0.0025515063605487205):0.00000100000050002909):0.00000100000050002909):0.0010611614454531407,(n164:0.0011474535464233966,n365:0.00000100000050002909):0.0011346599479709518):0.00000100000050002909):0.00046047758423652785):0.00000100000050002909,((n28:0.006481860014287838,n12:0.005090954614085768):0.000528224391818097,((n479:0.007761731212422353,n426:0.004661784024967654):0.0006274165232897867,((n394:0.0006005701659766587,n156:0.008933655507725504):0.002946177102285402,((n234:0.00000100000050002909,n342:0.00000100000050002909):0.0005241542949798494,n221:0.0005353793720950796):0.00210628468983248):0.0029805650954063626):0.0005837152992039554):0.00000100000050002909):0.0011253205804381183):0.00025134927279749916):0.00000100000050002909):0.00047316103919268663,n62:0.0044547586807200945):0.0005222833446938416):0.0005599367349267862,(((n196:0.008328000837650498,(n437:0.004768791886065805,n42:0.0008322372395589484):0.002187660894994784):0.0022391086478687865,(n272:0.011309642234988315,n395:0.004732615473132602):0.00000100000050002909):0.0022676185151432144,(n268:0.0027576475005917263,(((n256:0.006814172459462286,n205:0.00000100000050002909):0.0011364680146854155,(((n408:0.00000100000050002909,n410:0.0005362988505486689):0.0027945481846318922,n362:0.006152442084854539):0.00000100000050002909,(((n22:0.004164019948695081,n407:0.004401246072288384):0.0008106543450034355,((n312:0.0005590466090908963,(n219:0.002619533483354945,(n409:0.0026337259673473697,n53:0.003123171580379638):0.00000100000050002909):0.00000100000050002909):0.00221683370144705,(n325:0.003388869693618475,(n282:0.001228596842374003,n40:0.0005350628905563587):0.00000100000050002909):0.0006829113792645751):0.00000100000050002909):0.00000100000050002909,(n104:0.002333737737660225,(n370:0.0009094016500643504,(n191:0.005444086197841589,n180:0.0018985284338944018):0.0005630547181852692):0.0005734449485244411):0.00022011607731202778):0.0006422955569330463):0.0009639795023699717):0.00000100000050002909,(n165:0.002159544459468213,n49:0.0016647030541270772):0.0018383954527657234):0.0006730303491606855):0.001022073933598977):0.00026804787515569795):0.0012006458340375198):0.0008982044024330468,(n448:0.005590051486965113,n21:0.004763964330367816):0.00032908908150671074):0.0029442399974970697,n33:0.012385981430391699):0.0022888420706343006,(n87:0.011606173549511035,n257:0.01130050080683894):0.004864280451862184):0.0004781380959344968):0.0024953699270191367,n393:0.011461876933292585):0.000640390447199511,((n406:0.016039601413752973,(n430:0.012386055107993295,(n143:0.012907538785095077,n74:0.010191802543893588):0.0021374325045124282):0.0011538639940419605):0.0007771010972165968,((n86:0.014430799230057113,(n253:0.008447725099849939,n431:0.00969748552922997):0.0015757741748876077):0.003503939677265182,(n279:0.01577232786369537,((n264:0.00466525678908773,n463:0.003603959013569258):0.005589472209224734,n385:0.006448807922242099):0.004189757016647065):0.0015900967296379384):0.00029519522799093835):0.0014580465405892883):0.03743212302681117):0.010299905492747166):0.05095946582732198;
	TREE 'Imported tree 12++' = (n65:0.08855018918220545,((((((n21:0.006937436226374332,((((n478:0.008588488888008235,((n198:0.0051856342244980605,n132:0.007717076273774902):0.002612833319743707,((n203:0.006029480560233023,n427:0.0030888673558250035):0.012632196157401548,(((n11:0.010986577779390331,n352:0.0025193597292184505):0.0003928028203163988,((((((n479:0.011063066217090358,n173:0.000864508020135851):0.00035884530838059016,(n12:0.007389404405062272,n149:0.005427099904680788):0.0008932341552380656):0.0014481498222152387,(n419:0.005394042921862093,(n435:0.0036529532353082963,n131:0.0014030312888020525):0.0017374541641612222):0.0003383951715009973):0.0003437211039950106,(n426:0.006794286719827404,((n394:0.0018018688157435325,n156:0.008172715248636749):0.0011702042410002816,((n234:0.00000100000050002909,n342:0.00000100000050002909):0.0013464753733529848,n221:0.0006116979186684725):0.004050385374048395):0.0017760473399684698):0.0008657497281672162):0.00000100000050002909,((n30:0.006248147459576474,(n371:0.0013612984799832556,n375:0.003524616228046456):0.0010757513440489937):0.0023612301499225884,n126:0.003967595363548176):0.00000100000050002909):0.00000100000050002909,(((n97:0.007114507209226337,n293:0.006521946697922962):0.0010957984038151524,n452:0.0020962806974914113):0.00000100000050002909,n28:0.009199638620360443):0.000998252678382907):0.00039495374762650814):0.00000100000050002909,(n164:0.0010437224045413784,n365:0.00000100000050002909):0.0017315090120885441):0.0013955230545376353):0.00043771847807085924):0.00000100000050002909):0.0005800315041378676,n62:0.006814791793750203):0.0011484125850794483,((((n196:0.010690549564589978,(n437:0.0071681882733068735,n42:0.0006927305186348607):0.00044430223094926453):0.0026212577785749186,(n272:0.010939842208796484,n395:0.004146113214452401):0.00000100000050002909):0.003312020769303943,(n268:0.005659332335641166,(((n256:0.007421648628578421,n205:0.00000100000050002909):0.0016047940998643742,(((n408:0.00000100000050002909,n410:0.0006113425195754511):0.002553868749246276,n362:0.0066743864923395485):0.0005650730256068185,((n22:0.003934671360496825,n407:0.002651628133916186):0.0009409576349861729,((n312:0.0015735212280593922,(n219:0.002423756466045286,(n409:0.00000100000050002909,n53:0.0033442288758622745):0.001818075616834041):0.00000100000050002909):0.0021995884860812618,((n325:0.0055118393274346525,(n282:0.0018701409528268191,n40:0.0018583542957847797):0.00000100000050002909):0.0012901523307692153,(n104:0.004625325426547526,(n370:0.0020221593362747805,(n191:0.006957714327002856,n180:0.0020477048849709863):0.0008816350954477743):0.00032065040202803035):0.0009179858961974395):0.00000100000050002909):0.00000100000050002909):0.0006353724796130589):0.0009502620427815101):0.00000100000050002909,(n165:0.003154916828609867,n49:0.0005105429830579546):0.0014389233967792752):0.0008526570426127612):0.0021885351665534335):0.0007147103416236082,n227:0.007220601573321481):0.00017437094586216935):0.0005604626215276454,((((((n239:0.007424216302301805,(((n55:0.009082860816398336,n335:0.005150355613453195):0.0029307726144013287,((n459:0.0069085349044034315,((n353:0.006041046705022667,n240:0.003157483011670105):0.0010081724597543536,((n225:0.006537718322421921,n60:0.0005566809014258971):0.01036066361628677,(n242:0.00000200000100005818,n429:0.0009488378237480906):0.004981045370252432):0.0007097675428382359):0.00021641798604400334):0.0005756344356558541,(n421:0.005659642761467588,n328:0.008697768259482956):0.00000100000050002909):0.00000100000050002909):0.000842526322682809,((n318:0.01415992331862335,(n222:0.027797606522930576,((((n442:0.0029564569124073173,((n98:0.0099051238851189,n285:0.005731985002957841):0.00000100000050002909,n245:0.0025418189946912143):0.0029993915468293384):0.0014927490064045638,((n99:0.0017696540408990498,n200:0.001280966449266981):0.0011729215888809828,n183:0.0005878556520498164):0.00000100000050002909):0.0012882010769389237,n259:0.006670678257191693):0.00000100000050002909,(n207:0.006574934685870698,((n73:0.006091223791339838,((n381:0.0156201042691248,n79:0.004960997290563691):0.00000100000050002909,n26:0.01563229197487994):0.0007247034376050575):0.0013663828077792853,(((n364:0.007408975311892605,(n388:0.005291459264488386,n145:0.0012107275483100967):0.00534403995259706):0.001749180460149479,(((n441:0.006613866398829487,n141:0.009564438487648695):0.0016342706912324794,(n189:0.009092575978945415,n450:0.008391830399699096):0.0012340860009826086):0.0011707372694856042,(n273:0.012015788758168435,((n224:0.004367108717534395,n438:0.006539712866211125):0.0033347560343516213,(((n32:0.0032277418159895013,n211:0.001780885498215095):0.0009608750855137961,n78:0.0030043178708102055):0.0003097351688963146,((n440:0.0027512527561374136,((n160:0.00994807208138188,(n345:0.01441558170577914,((n434:0.0011676174624348893,n14:0.00000100000050002909):0.0011669532879891766,n340:0.000585080040119634):0.0056691844942385996):0.0020057986740967633):0.0011787934219664089,((n306:0.0017943302126789107,(n258:0.00000100000050002909,n405:0.0018624115781695073):0.0005992092185291791):0.0005917507950745365,n425:0.007022084827323793):0.003528373637288474):0.00000100000050002909):0.0017152071368695201,(n210:0.0034845166712486613,(n468:0.0023601925650043208,n377:0.006652696308378697):0.0022965629887609826):0.0003705531937036046):0.00031138045344509933):0.0002688720510841538):0.0005631117177521338):0.0005521867167383436):0.00000100000050002909):0.00000100000050002909,(((n209:0.011343548718069162,n89:0.010283224655817652):0.0011231402164310685,(n238:0.004709484584667135,n255:0.00000100000050002909):0.004706890472299658):0.00000100000050002909,(n50:0.012163492599962578,n237:0.007451216393477354):0.0010473946067910106):0.0017477849111648012):0.00000100000050002909):0.0025463371127385755):0.0008677829821712261):0.00000100000050002909):0.00000100000050002909):0.00000100000050002909,(n244:0.0011899096352118194,n269:0.009249899916300795):0.004774398226656852):0.00019165841413220082):0.00000100000050002909):0.0012153981332236742,(((n346:0.01025725913110531,(((((((((n471:0.002142151096926169,(n108:0.00273462948173571,n96:0.00000100000050002909):0.0024346306158616222):0.0005207306742230026,n19:0.0021204041655236154):0.00000100000050002909,((((n415:0.00000100000050002909,n85:0.00036322222823782275):0.002543653823168616,(n307:0.00000100000050002909,n247:0.0008676256056081669):0.002309132166544034):0.000968949602310938,n254:0.0012093657783266768):0.00000100000050002909,(n382:0.004925776704883288,(n163:0.0024201640036997916,(n192:0.00000100000050002909,n113:0.0024171255015128044):0.0018198085173600186):0.0018133939542545408):0.0006024536730103382):0.00000100000050002909):0.00029763762472427146,n301:0.005442605579028014):0.00000100000050002909,(n190:0.0012008838031490427,(((n194:0.0057281408270744944,(n326:0.001219620482042616,n444:0.0018816232504642663):0.00000100000050002909):0.0006090673213013262,n94:0.002433185197766062):0.00000100000050002909,n351:0.002559891753276578):0.00000100000050002909):0.00000100000050002909):0.0003083948447627088,(n313:0.00000100000050002909,n336:0.005692257955449101):0.005530333975742142):0.0032838660011479818,((n83:0.0048104537573628635,((n110:0.0017879143669706644,n236:0.006224505627381988):0.000596101771683931,((n349:0.004746644381761074,n186:0.0013020900083562813):0.00000100000050002909,(n383:0.0006468930409632783,n467:0.0030449317533411333):0.003300818226913281):0.0013058395919110335):0.0006462926557761018):0.004136678194345314,(((n134:0.002363550615938226,((n445:0.0018579234494074438,n443:0.0012473115129719408):0.00000100000050002909,n128:0.004255127775938793):0.005870091904870577):0.0014116479114854828,n366:0.005844568022029603):0.00037235017381204546,n44:0.01186978755952021):0.0006309089649761887):0.00000100000050002909):0.0011968083141427552,n177:0.015249091878943423):0.00000100000050002909,(((((n54:0.0041391096219749275,n188:0.00000200000100005818):0.0005298698841285541,n37:0.00539067910057674):0.0006022566188613599,(n399:0.00000100000050002909,n120:0.00314313695543355):0.002105368588833354):0.0015492170555332374,((n460:0.00000100000050002909,n334:0.0003283735141122946):0.005035231826964298,n305:0.01426674516233132):0.000706186175222883):0.0023028730666118536,((n88:0.012038774451735,((((n69:0.00000100000050002909,n75:0.00000100000050002909):0.005152338602664188,((n199:0.0013057328130012037,n187:0.0006317290242766142):0.0030412780351273556,(n358:0.0012842882359130605,n138:0.00684411481152085):0.00000100000050002909):0.0006442618114342502):0.0003154710965706187,((n9:0.010073686301022174,n52:0.004157983506076754):0.002810723931380069,n155:0.00982108082085217):0.00023324846934706179):0.00000100000050002909,n451:0.009243852490902966):0.0012915011818877247):0.001157500814316693,((n127:0.011910848264065728,(n206:0.0012452662162464351,n204:0.00000100000050002909):0.005864959754867779):0.0018278160218064218,((((n168:0.011857298700988885,n317:0.0018418702102814594):0.0019750619096116427,n464:0.0015348674063607876):0.00008249710249952863,((n228:0.005778000019213503,(n153:0.006429603748273796,(((n46:0.0006039592023375703,n112:0.00000100000050002909):0.0006035337581238282,((n212:0.00048644261393291,(n115:0.00000100000050002909,n119:0.00000100000050002909):0.00000100000050002909):0.0014578078509195976,(n284:0.0017414641491908037,((n231:0.00000100000050002909,n70:0.00000100000050002909):0.00000100000050002909,n135:0.00000100000050002909):0.009493320261793607):0.0023382940270690153):0.00003056861267559879):0.00000100000050002909,n476:0.0006265515771307309):0.00000100000050002909):0.00000100000050002909):0.00000100000050002909,(n424:0.00000100000050002909,(n398:0.00000100000050002909,n34:0.00000100000050002909):0.00000100000050002909):0.005739050558453143):0.00031158889072148204):0.0015826713125460428,((n182:0.0039057714138019755,(n111:0.0012862868740540078,n359:0.0005936798891905651):0.00000100000050002909):0.0035991158028754323,n280:0.0029718601651855868):0.00031848661288285274):0.0007525775659473435):0.0006465192350218764):0.0012682899287976234):0.00000100000050002909):0.0005841522114869077):0.0009725185586666892,(((((n418:0.005937149230520274,n93:0.004310777961441166):0.004745557698208322,(n137:0.0008199655425997936,n103:0.0007558454543866306):0.005194254779519749):0.0015074350423317736,(((n369:0.00000100000050002909,(n185:0.00000100000050002909,(n267:0.0018164750389434068,n414:0.00000100000050002909):0.0017692810055176917):0.0018516754569005381):0.002529708816671894,((n15:0.00629852929482376,n392:0.003197390187327284):0.0011695268452109134,n220:0.0026358951057822736):0.001052828987623413):0.0007119295053211378,((((n102:0.0005176676728351203,n109:0.0011823410763642439):0.00047666365241377215,n446:0.007399199666874159):0.0052289691043479695,n152:0.01346159127880107):0.0010154280123867282,n298:0.0060089355388281305):0.00000100000050002909):0.0009641687928288403):0.00000100000050002909,(((((n36:0.0012285496812082337,n367:0.00000100000050002909):0.002544562236848471,(((n286:0.0030617110764119817,(n472:0.00000100000050002909,n157:0.0012926144072931474):0.00000100000050002909):0.0002577605613188686,(n337:0.00000200000100005818,n197:0.0011830883409729481):0.00000100000050002909):0.00036075855549773,n475:0.00200588584018346):0.0010988227241084535):0.0015987849551112462,((n436:0.0019115407378486051,(n332:0.005571618239957732,n130:0.009878958262705349):0.0017782766930473266):0.0016352259522161648,(n360:0.0012592126816328528,(n0:0.0009903722175599048,n289:0.001498011227240111):0.00048781317963854777):0.0004927884653231101):0.00000100000050002909):0.0005978213959573255,n311:0.009464396653421527):0.002191569427570735,(n174:0.012367675909453247,((n357:0.005890647940351749,((n64:0.024936517569368724,(n250:0.001533136783736718,n140:0.0036720335530297074):0.002090243910190162):0.00000100000050002909,n100:0.0004914713601062228):0.0009097794669136555):0.0007344197454254223,(n10:0.0075158474461644335,(n56:0.003057382526932951,n416:0.0038018693931305353):0.0023476109089575824):0.0005574923286440472):0.00000100000050002909):0.0019062633589675923):0.002604312673738122):0.0006275901142251271,(((n469:0.012519636360245823,(n35:0.002285222292411041,n18:0.00000200000100005818):0.005114007586932871):0.0016893721800154851,n314:0.0031150802422383527):0.001226412305608086,((n8:0.010421031900371233,((n403:0.0034755988922461813,n320:0.0036752222419528663):0.0014035019511558953,((n95:0.008358387234210242,n251:0.005510292884011241):0.002810895988249919,(n166:0.012598962007470078,(n480:0.005473937846133805,n287:0.005688409484558171):0.0011453034138451002):0.00039191164602008085):0.0008570875313665098):0.0020971348129102388):0.00034227041538787637,((((n41:0.0030549863175024154,(n390:0.005492936087378354,n263:0.002525831886427525):0.0053438857993070524):0.0029912595215764465,(n202:0.0014648955140278822,n48:0.001337486980216312):0.003987676463243859):0.00000100000050002909,(((n226:0.0027443135760757318,n291:0.010607231812445802):0.0034824649548567147,((((((((n229:0.0005825092544223415,((n175:0.004169910846710425,n214:0.0014357675706352657):0.003754250931278123,(n43:0.004176253894248211,n136:0.0008352600064877594):0.0017740877938418453):0.0016655503994741114):0.002489662164581728,(((n170:0.001797692798343893,n217:0.00000100000050002909):0.0011854141238442457,n361:0.0012202502506117204):0.0017786660928988695,((n125:0.001216541427567292,n7:0.0026438913149399675):0.00000100000050002909,(n262:0.0017789065246140378,(n338:0.00000100000050002909,n133:0.0018227492109325473):0.0011870547069298468):0.0023560772064436875):0.00000100000050002909):0.0008405130660516355):0.00000100000050002909,n142:0.000591775739295181):0.00000100000050002909,n71:0.009166599154727232):0.00000100000050002909,n39:0.006251413793960071):0.00000100000050002909,((n218:0.0006098059950063188,n380:0.0018409679158811723):0.0066924396842172485,(n144:0.0012324413908037242,n396:0.0017544402884810603):0.004382677261929158):0.0011829442079185455):0.0017805878170965332,n5:0.013873433755613679):0.00000100000050002909,(n372:0.018003246921175595,(((n321:0.0029808441147458043,n158:0.0011973156392749964):0.00000200000100005818,n356:0.0024606081270094433):0.005011157252529596,(n150:0.0024253025180571066,n63:0.00000100000050002909):0.002935435530540864):0.0025018120868972957):0.00000100000050002909):0.00000100000050002909):0.0009412765008063109,n355:0.008383635332828309):0.00000100000050002909):0.002502318375058626,((((n423:0.003032183295791307,(n379:0.0012221215733132053,(n27:0.0005892008110754352,(n368:0.003623215020686106,n25:0.001184133081835515):0.00000100000050002909):0.0005873277203307939):0.002953055918165332):0.004253482637515807,n281:0.009828684762119413):0.002303266775087297,((n265:0.0015623112648883342,n266:0.00000100000050002909):0.00000100000050002909,(n260:0.004128127190975117,(n201:0.002756308671815304,(n316:0.0011461454079266492,n154:0.004782302736349266):0.00000100000050002909):0.0018836052531572384):0.0013816144042711558):0.003633772400232507):0.0002895501829434366,(((((n384:0.005794855566313534,(n261:0.000663154779958411,(n241:0.0011720214594639422,(n243:0.00000100000050002909,n161:0.015585286665504215):0.006548129423618242):0.00000100000050002909):0.0005845730328140953):0.00000100000050002909,n309:0.007882165583442263):0.00000100000050002909,n230:0.007787404162057437):0.00000100000050002909,n462:0.00505427894260228):0.0004985330034047075,(n45:0.01810453927397381,((n122:0.0034086135652959654,((((n439:0.006246647147755516,n304:0.0031156525338959197):0.0005475447530753428,n348:0.008199484088841906):0.00000100000050002909,((n171:0.004768068374342868,n391:0.01154137815848767):0.0014579818734788363,(n323:0.004561410943578177,n310:0.0006714701227352397):0.0038540795077041863):0.00303229518945923):0.00000100000050002909,((n387:0.0035669147046185298,n417:0.002982454002752718):0.0005835172801170737,(n3:0.006091515934546657,(n2:0.0023831500931411507,(n66:0.00000100000050002909,n246:0.0037395225457788443):0.0005906590436821691):0.0005881922726057477):0.00000100000050002909):0.0005863196112764406):0.0005762942373097577):0.0013199811619212364,(((n252:0.0036133253557840495,n447:0.005472259595027768):0.0011748361730194465,n324:0.004185122685724269):0.00000100000050002909,(n344:0.004791606800524259,n276:0.0012605024248435223):0.00295203503570595):0.0012564536527202772):0.00000100000050002909):0.001213723258910208):0.00000100000050002909):0.0004518760834335907):0.00000100000050002909):0.00000100000050002909):0.0007577909644234467):0.00000100000050002909):0.0005753745297732336,((n455:0.01598036130462853,(n23:0.014512884248904427,n117:0.00573691145982025):0.00409969378727997):0.002717227908955516,n481:0.011922453053321805):0.0031782432352835052):0.00011045917624996542):0.0003879069309948039,(n297:0.009139263076214378,(n270:0.0005852513284215123,n274:0.002347253846896059):0.00544453972526898):0.0011910430136215032):0.00033985526045700635,(((n248:0.002957769919037366,n129:0.002443716189993771):0.004538194284887463,n283:0.005680776255655619):0.0018169685386051917,(n169:0.006154255466333016,n172:0.006325212173687817):0.006443361796063272):0.0006937064363996025):0.0004972762805646791,((((((n341:0.007951213703955408,n159:0.017850340872421436):0.00000100000050002909,(n61:0.005216478698329515,(((n29:0.00000100000050002909,n167:0.00000100000050002909):0.004866022477864776,n6:0.00000100000050002909):0.00000100000050002909,n193:0.00000100000050002909):0.009006017363482348):0.0011907467320846417):0.0007848245988126781,(((n376:0.008061671475867461,n433:0.006110291862185145):0.0007623522569620541,(n458:0.0037345951407238894,n303:0.00508867244029382):0.0018432740930070534):0.0029516462089314113,(n147:0.005055684262160611,(n68:0.0023719170626872424,((((n354:0.010211367841943536,(n116:0.0005918597136595329,(n477:0.0030268218131013895,(n465:0.002588512291621823,n118:0.004319014530829021):0.0014451742118235967):0.0004635921204938372):0.00000100000050002909):0.002389862622458574,n16:0.0057355696622245975):0.0009322737098313301,(((n4:0.003589905652209696,n474:0.0007098853669439096):0.0020673027852194815,((((n13:0.005964563612396889,((n457:0.003217757883900262,((n350:0.00000100000050002909,n470:0.00000100000050002909):0.0017660843338627883,n363:0.0005568351990135944):0.00000100000050002909):0.0009097210499238799,(n123:0.0017850822113397535,n124:0.0006246598777800245):0.001189519716889069):0.002293248621727619):0.00000100000050002909,(n333:0.00000200000100005818,(n404:0.0025024717449468404,n294:0.00000100000050002909):0.0029735376591110045):0.00000100000050002909):0.0018310120670788962,(n47:0.00000100000050002909,n24:0.002705390433033083):0.002547638200124768):0.0006773849807702768,(n232:0.004693583105777567,(n148:0.0023807902137733643,(n482:0.0023740601143388603,(n412:0.007252065311769839,n176:0.0011160308166731818):0.00000100000050002909):0.0011135116274811603):0.001116770955338144):0.00000100000050002909):0.00025232133058753197):0.00000100000050002909,n249:0.012406210884679615):0.0007563190497010422):0.00000100000050002909,(n466:0.0011908990687877611,n233:0.013559494365094042):0.001195234995382917):0.00002156919826157325):0.0004915732641014122):0.00000100000050002909):0.00000100000050002909):0.0008308099776982488,((((n290:0.0017995706781677812,n215:0.0025395325065679913):0.002111075787594623,(n456:0.0024172676070731494,n411:0.00477004059471831):0.0035811199024124154):0.0015062139919378218,(n302:0.003190471036680991,((n20:0.004008295340200953,n76:0.0006911961413361095):0.0027288067254820922,n184:0.005330637266603076):0.016486354034270383):0.008154924875340872):0.00000100000050002909,((n449:0.008233364857051714,(((n327:0.00239220120926986,((n162:0.016925068782267808,n72:0.006552462752250586):0.001960676443214062,(n58:0.003885050845239781,n473:0.0020582277916735246):0.003536618822272516):0.00000100000050002909):0.0009140961880356907,(n299:0.007058451519025845,((((((n178:0.005566044313839103,n308:0.003278169243778574):0.005147739095853455,n106:0.0085910112087344):0.00000100000050002909,n57:0.0034055511901179155):0.001188348497848074,((((((n81:0.0024888720833992537,((n235:0.0008324089126780044,n347:0.0008242975742006902):0.00000100000050002909,(n322:0.0013541683123066202,n216:0.0012055156910581516):0.0019904911995662516):0.00042411654718036877):0.0000015718457322437,((n208:0.008768525608386849,((n401:0.001250343091714263,n339:0.013589355729991329):0.001155804867961631,n275:0.0036448115013505986):0.00000100000050002909):0.0013233570849800025,n92:0.0054495198068860665):0.00045702719179979993):0.0007771471942150633,n271:0.007177783609827958):0.00000100000050002909,n121:0.003562182443046792):0.0015581713793768094,(n296:0.006973704947692087,n374:0.009596649519921178):0.00000100000050002909):0.00000100000050002909,n1:0.009921705581341663):0.00000100000050002909):0.0007225900187505771,(((n91:0.00000100000050002909,n378:0.0011197300459097781):0.0043426822963378775,n343:0.0027133772497646307):0.002008991119231358,(n90:0.0020689697122190085,(n181:0.003159827485093134,(n386:0.00000100000050002909,n107:0.0006683145496219154):0.004717922311787803):0.001976730346309943):0.0035067855775046293):0.001811673018239533):0.00000100000050002909,((n329:0.0011632824568727292,(n300:0.003013250337486198,n295:0.0031155456558234333):0.0024268082673331234):0.004803453153718343,(n59:0.0003454565737731189,n461:0.0019062334825020598):0.006617961926651016):0.0014181794271742657):0.00000100000050002909):0.0009873798117495036):0.0012137758346449405,((n139:0.0014338965040212076,(n195:0.004113210440113859,(n84:0.00000100000050002909,n278:0.002406238046681359):0.0018833351843698294):0.0024191084910945393):0.005249797439313706,(n389:0.006864830416891671,(n151:0.00661976725475351,n373:0.0027685789718214795):0.0018742825530330205):0.001899851488666652):0.00026744814849614186):0.00000100000050002909):0.00000100000050002909,(n330:0.004429786392001967,(n223:0.013275083025383896,((n179:0.0020829361558178617,n428:0.0027988632152285576):0.007555390095174746,(n101:0.008279230145324905,(n413:0.003041973001991532,n38:0.0026122046696593557):0.00000100000050002909):0.0005133463385475474):0.000572252979193748):0.0018562323174409015):0.00045684080036416234):0.0004392468448544881):0.00000100000050002909):0.00021907009059428113,((n288:0.005606384227128339,(n80:0.0024660240381507987,n315:0.012984058498141963):0.004005096145284165):0.001268948606006514,((n397:0.00000200000100005818,n422:0.0009601043719064427):0.0028861126284789457,((((n51:0.0054086347580306615,(n277:0.0012061268678705914,n17:0.007918222939447161):0.00000100000050002909):0.00260986388146889,(n31:0.0012532236734568503,n331:0.0007568880276994936):0.0022512007311615576):0.00000100000050002909,n453:0.004425941434597987):0.0010311659222769789,((n432:0.001908778627118051,(n67:0.00000100000050002909,n105:0.01055224771979316):0.0012479182182179227):0.004777452194513739,((((n420:0.007529349769681436,n319:0.0019463010226225138):0.0024733398433381616,(n77:0.0017755021744204436,n402:0.00000200000100005818):0.0030721594166170205):0.0006497878399569127,(n400:0.009226789356951724,n213:0.006288211590432629):0.001179234933420696):0.0022885915581520337,n292:0.010891201785693513):0.0007862528442626946):0.0004221311907425121):0.0005304407316514627):0.00000505071052449874):0.00016432937940909643):0.00000100000050002909,(n82:0.005028564003304597,n146:0.00028395728482027326):0.009605612772641818):0.00008690938241882057):0.0007606366281191066,n448:0.0073373639807411):0.0008731150254928301):0.0006505823978823073):0.004413343874869971,n33:0.018417216715640648):0.0022962762907885446,((n87:0.01598508883134929,n257:0.01309786043318796):0.00667407348200571,n454:0.015408596780699897):0.0009400079547469951):0.0039634327593448095,n393:0.014760478841001713):0.00040774900645962656,(n406:0.01913961535916114,((n430:0.0187686762236197,(n143:0.015879647791182214,n74:0.012153666493188801):0.0010651769409068877):0.0015265739968828539,((n86:0.019703792791296564,(n253:0.009635581470163822,n431:0.011024756110504129):0.0035056596491342255):0.002780967304346459,(n279:0.012566066080193396,((n264:0.00696160466668625,n463:0.004260309247131224):0.004451933099092879,n385:0.006261133079812103):0.003930421187367468):0.0015934339409113321):0.0006158928143942177):0.002111445632223785):0.0014337816460576005):0.03997722618823112,n114:0.059362531952991286):0.010326733792672292):0.05756096958894878;
	TREE 'Imported tree 13++' = (n114:0.062309163173095886,(n65:0.08150172919992638,(((n454:0.015493397178713453,(((n21:0.004544311692581961,(n448:0.006862723737746835,((((((n478:0.008182364664718795,n97:0.0036053299597797496):0.00000100000050002909,(((n149:0.005329194658240572,n12:0.005113401918719972):0.00000100000050002909,((n479:0.008413435739016123,n426:0.004931299755792231):0.0003446574442951116,((n394:0.0012692807971959124,n156:0.007462335238419061):0.0006012500689432709,((n234:0.00000100000050002909,n342:0.00000100000050002909):0.0008547586909350147,n221:0.000546111576072452):0.0034638256036475983):0.003166666951279129):0.001303502952652654):0.00000100000050002909,((((((n203:0.006464419293677994,n427:0.002084762514054775):0.007686277925838665,n419:0.004501553662093449):0.0012077957108400095,(n435:0.001610875182323467,n131:0.0017272200457951715):0.0008420539657714854):0.0006428780002633932,(n164:0.0012344564842971199,n365:0.00000100000050002909):0.003686883884135956):0.00000100000050002909,(n11:0.010552213712561693,n352:0.0023907321358820387):0.001175201311829387):0.00000100000050002909,(n28:0.010423928908720117,(((n126:0.0019591336744520446,n173:0.0017531105105616474):0.002352777823250942,n293:0.0027983613605450535):0.0002815701296343447,((n30:0.003971413569030148,(n371:0.0011637142533092038,n375:0.0022185458933987154):0.0004820423299884557):0.003111577721459519,n452:0.004307920485166267):0.00000100000050002909):0.00000100000050002909):0.00024356477710715143):0.0005310368593712748):0.0010633265215022317):0.00000100000050002909,(n198:0.004072290138042971,n132:0.00861285905672348):0.0008672174554673562):0.0009184999246042937,n62:0.005651801300370778):0.0012958761107710578,(((n272:0.010668846639108496,(n395:0.009547108203635392,(n196:0.0053422305027592,(n437:0.003515007275420437,n42:0.0009398864688704743):0.00027468267401143645):0.0012875043692266162):0.001925613751752186):0.0035453114581245546,(n268:0.004437221037707323,(((n256:0.012256427513460311,n205:0.00000100000050002909):0.0011954115308461838,(((n408:0.00000100000050002909,n410:0.00000100000050002909):0.0038697413694776,n362:0.00600724000175548):0.0008082421357906714,((((n325:0.005827825614487041,(n282:0.002234691576189225,n40:0.00000100000050002909):0.0011096044918247644):0.0006424611956683228,(n370:0.0009485636220048667,(n191:0.005064381314572276,n180:0.001892109424902866):0.00000100000050002909):0.0011887280761878106):0.00000100000050002909,(n312:0.0011664361982419793,(n219:0.0043151290245569615,(n409:0.002154692264120746,n53:0.004047335093884968):0.00000100000050002909):0.00000100000050002909):0.0017420682309110301):0.0002426481819696705,((n104:0.0030469484459884027,n22:0.004481178039589739):0.00000100000050002909,n407:0.0025243955234130785):0.0005711928286757945):0.0007382111589771238):0.000997629806011722):0.00000100000050002909,(n165:0.0019332843622270521,n49:0.0024912409135262165):0.0012776065723337558):0.0011854739139471584):0.0010928309923752873):0.0005989235947161357,n227:0.005587689746516495):0.00018220841890605348):0.0005989079191048148,((((((n458:0.0033710018205296175,n303:0.0066234007805770915):0.001072031669036868,(n376:0.004492995049149102,(n195:0.0057405489390540965,(n84:0.00000100000050002909,(n139:0.0031703918374897636,n278:0.001096471741467288):0.00033967797657789763):0.0008423536630685649):0.0022668622544157937):0.0005903125170061776):0.00062170579675822,((((n233:0.006700685916434394,((((n29:0.00000100000050002909,n167:0.00000100000050002909):0.004204700678058413,n6:0.00000100000050002909):0.00000200000100005818,n193:0.00000100000050002909):0.005916057143368636,n341:0.008086804379966079):0.0010715263582208414):0.00000100000050002909,n449:0.006876092771563981):0.0011954893740093147,((n151:0.0050958140849324245,n373:0.0037527148720039745):0.0017171707590227672,((n223:0.004867996247890892,((n428:0.0026788275993040044,n179:0.0019672573924118283):0.013682074148890049,(n101:0.0047916456014948676,(n413:0.006024013374939297,n38:0.002246397428311114):0.0002117148107568108):0.001566411070496828):0.0008995533052136782):0.00044914480914577757,(n330:0.010452059727683462,(n68:0.0037798566937503313,(n354:0.013046893550312123,(n116:0.0010649855775804289,(n477:0.00000100000050002909,(n465:0.0024074777047037705,n118:0.002193153155600674):0.0005448956020373337):0.0010889276455914177):0.00000100000050002909):0.0032581540542904164):0.002172103237852775):0.00000100000050002909):0.00000100000050002909):0.00000100000050002909):0.0001843239828594694,(((((n302:0.004117845184549685,((n20:0.0012351788075333943,n76:0.0024266107279978374):0.002294175618188126,n184:0.007346179443765464):0.010401890274752738):0.0037928198764392894,n147:0.0030315819548576667):0.0007846459041663784,(((n159:0.012676519249214866,n232:0.006222763975449195):0.00000100000050002909,(((n333:0.0017675757322611458,(n404:0.001705853878017615,n294:0.00000100000050002909):0.0034828132281612837):0.00000100000050002909,((n13:0.002689056794378773,(n47:0.00000100000050002909,n24:0.00000100000050002909):0.004687615144951056):0.00000100000050002909,(((((n123:0.0005346138501223992,n124:0.0005693771602404431):0.0005334691323069354,n457:0.0020100248013269766):0.00000100000050002909,n350:0.00000100000050002909):0.00000100000050002909,n470:0.00000100000050002909):0.00000100000050002909,n363:0.0005348964568634967):0.0031837980001963775):0.0009593357595881766):0.0005512446754266776,((n4:0.001319497335406382,n474:0.005232878427218761):0.004446028536257952,(n466:0.0022189809141924467,(n148:0.0010680874602035325,(n482:0.002142167963840855,(n412:0.006501331291095921,n176:0.0007979125252589247):0.00000100000050002909):0.0007971184594278511):0.0007996253573579238):0.0011591443780724327):0.00000100000050002909):0.0006168064757456797):0.0006478932848043107,n249:0.003882010179080872):0.00048281812652043783):0.00000100000050002909,(n16:0.007117915862489153,n61:0.004243470277621893):0.000581965970858637):0.0007898396244275199,((n389:0.003818265899014932,(n290:0.00153582389656482,n215:0.005081031605267784):0.0023205673180212646):0.00029795301588149696,(n456:0.0010610176776033385,n411:0.006077284721201524):0.002413969941809125):0.0009195733644300022):0.0001728019256874439):0.00000100000050002909):0.00000100000050002909,n433:0.0038869120101510924):0.00017469526610223207,((n327:0.0060465794420800426,(n72:0.005221677763868027,(n58:0.006384857289945984,n473:0.00000100000050002909):0.0018155592271073414):0.0017354205546040618):0.000863073177120688,((((((n91:0.00000100000050002909,n378:0.0008110921642635142):0.005323456522909569,n343:0.001443510057294816):0.00332226085862492,(n181:0.0017236314894249457,(n386:0.00000100000050002909,n107:0.00053619755658398):0.0014236266369153689):0.0023044769785157153):0.0014260769552920968,(n90:0.0015968849942998998,n299:0.008140552817751005):0.0009833646452012549):0.0003230050046728336,(((((n178:0.006695106130598295,n308:0.007446085877048666):0.007260251063319442,n57:0.0016172369681866844):0.00000100000050002909,n106:0.0038089677394048034):0.0005339225790393704,(((n162:0.02190173132559225,((n208:0.0060168371021999305,(n296:0.0074768849608343665,(n81:0.001674690888543625,(n322:0.001224771415844274,n216:0.0005461354533653538):0.0005954360274292125):0.0017851191993954255):0.00000100000050002909):0.00000100000050002909,((n347:0.000627187692710844,n271:0.004582137321621861):0.00025250689439321715,(n235:0.00000100000050002909,(n275:0.009234139910482761,n92:0.006552044144817572):0.0034259660660970865):0.00000100000050002909):0.00000100000050002909):0.001555506211115866):0.001047461591345892,n121:0.001603185635087042):0.00000100000050002909,((n401:0.0021530322407932426,n339:0.012250901427767339):0.0010604594171006007,n1:0.008028595991166227):0.0010616762929842836):0.0015790776882266871):0.00000100000050002909,((n329:0.004830297162510011,(n300:0.0016166074083677846,n295:0.002825582803154387):0.0010904274265806178):0.005937096030780595,n374:0.009127829155646604):0.00000100000050002909):0.0009924003427062848):0.00000100000050002909,(n59:0.00032358481472051146,n461:0.0021721156786686764):0.004314469368501626):0.0010307882725308368):0.001381926175552333):0.00000100000050002909,((((n82:0.00862028690913807,n146:0.0006944467254287761):0.005516489813472481,((n397:0.00000200000100005818,n422:0.0011942064896455992):0.003904239759871248,((((n51:0.004322818553651484,(n277:0.001068966976237569,n17:0.007068024479617029):0.00000100000050002909):0.0005230036780217417,((n31:0.0011125622395401068,n331:0.0005343554050653536):0.0005341196539487697,n453:0.007411375651918398):0.00000100000050002909):0.00000100000050002909,n292:0.010219972974869427):0.0023113728286880365,((((n420:0.0033847690459286013,n319:0.0021367335462850173):0.0024476681974598207,(n77:0.0037085464743911224,n402:0.0012064941780975187):0.0034828003931791224):0.0008960852178278477,(n400:0.009902544715224042,n213:0.005518940991764902):0.0005101295302338804):0.0013347375473208637,(n105:0.0038569328408092946,(n432:0.004533891424531929,n67:0.00000100000050002909):0.004752869408467201):0.003335394354514611):0.0007681369368213786):0.001596853321153971):0.0003375176637408643):0.00000333445380413654,(n288:0.0030049536699787503,(n80:0.008056046557086267,n315:0.006469446117919567):0.0033362297369913772):0.003541979979068934):0.0001321165887860512,(((((((n423:0.003297937555796152,(n379:0.003929304963833167,(n27:0.0010716791424849892,(n368:0.0010836182764036757,n25:0.0015996794519891528):0.001066614809295136):0.00000100000050002909):0.0004818839918631699):0.004375427117424778,n281:0.010904227206943251):0.0022218587760994813,(((n265:0.00000100000050002909,n266:0.00000100000050002909):0.00000100000050002909,(n260:0.0026657844895227874,(n154:0.0032848206246227094,(n201:0.0013504459676151406,n316:0.0013902857499835078):0.003163763264997968):0.0016350807499606775):0.0008928864243997769):0.005957846897100615,((((((((n387:0.005357805524459266,(n439:0.005520467802770287,n304:0.00054433944682193):0.0021544888108037015):0.00000100000050002909,n348:0.0068562609643336506):0.0021403039318532826,((n323:0.0038960042288359036,((n310:0.00000100000050002909,n171:0.0029608838787321262):0.0009021115519501175,n391:0.006279862340783688):0.001093533181982457):0.00000100000050002909,n122:0.004128734400412598):0.00000100000050002909):0.00000100000050002909,(n66:0.00000100000050002909,n246:0.0030400301588243564):0.0024792450479574624):0.00000100000050002909,n417:0.005946438607663077):0.00000100000050002909,(n2:0.003789592812209563,n3:0.007124214786460394):0.00212589988611732):0.0019692823860860452,(((n252:0.0048722925000740476,n447:0.006560133142165849):0.0004932698894342472,n324:0.0037604382426036833):0.00000100000050002909,(n344:0.0059879089350039355,n276:0.004242226543428814):0.0032849652156289075):0.001855369375642991):0.00000100000050002909,(((n309:0.011410488077294986,n384:0.0017957490513743136):0.0008583677387980671,(n261:0.002484116860112032,(n241:0.0015911602472493058,(n243:0.00198737056412724,n161:0.012948314324925062):0.0018408056666311303):0.00000100000050002909):0.0005545827185880432):0.00000100000050002909,n230:0.0038739542042704705):0.0006300063858422246):0.00000100000050002909):0.0015143424828748468):0.0011470212408799443,((n355:0.003741632511245298,(((n207:0.004523918441644807,(((n224:0.0058549262179267625,n438:0.006376496564489645):0.002795237169431962,(((n306:0.001081118874050505,(n258:0.00000100000050002909,n405:0.0005538983665245807):0.0010725167189245598):0.0004840343079400894,n425:0.004010181635511656):0.0036782370837543906,(((n32:0.0024313660859109996,n211:0.0013399375630011796):0.001086195594698083,n78:0.00269510179936875):0.00000100000050002909,((n210:0.01130607656018685,(n468:0.002572643517585335,n377:0.003227185988058018):0.0025435669318135848):0.0009234929699831871,n440:0.00356778930060932):0.0006156187245324297):0.0008378373347103629):0.0008192752600230906):0.0008292432454234827,(((n160:0.009903223215580266,n364:0.005669331668267549):0.0010796727828814264,(((n434:0.0015583384512501798,n14:0.00000100000050002909):0.0005182660541264808,n340:0.001041418331028554):0.011074372172385832,n273:0.012021673457223653):0.001163437212607304):0.00000100000050002909,(((((n388:0.003148761751045031,n145:0.003247458593730421):0.008993997431099417,(n189:0.006877826715422334,n450:0.00806922133387535):0.002296596372030425):0.001074289978185198,n441:0.006268779682097361):0.0016266740378312848,(((n50:0.008377872265462244,n237:0.004430318803237909):0.001242861275433433,(n89:0.012425903965837315,((n238:0.0015893865963580646,n255:0.00050682446763742):0.00422528757651131,(n345:0.020143597908895708,n141:0.007465835442133651):0.0016187624463653634):0.00000100000050002909):0.00000100000050002909):0.0004851279327903781,n209:0.011250790449919515):0.0016135676039199225):0.00000100000050002909,(n73:0.003157622444811904,(n79:0.005348350004020675,(n26:0.0047356606421485765,n381:0.017462974443741185):0.0011109514218984892):0.0011362536187509815):0.0003598492494476327):0.00031392245410701366):0.0009712560158277681):0.0019638958682777125):0.0007803641049068982,((n421:0.00524449540173561,(n55:0.004843289996947736,n335:0.008279419187045813):0.0008962990693640001):0.0006918490579441111,(((n240:0.005322463916124783,n459:0.003936030873987343):0.0005261549523155956,((n225:0.0023420162053742763,n60:0.0017867391789937901):0.0065799609877036066,((n242:0.00000200000100005818,n429:0.00000100000050002909):0.0051628021210249125,n353:0.005965628818528634):0.0006591397718428338):0.00023620849477061972):0.0006642344806510926,n328:0.008044290732165662):0.00000100000050002909):0.0012049259453075876):0.00000100000050002909,n259:0.006636241686215116):0.00000100000050002909):0.00000100000050002909,n239:0.0022327641632717164):0.00000100000050002909):0.0007703643092937097,(((n35:0.0010318534118646295,n18:0.00000200000100005818):0.006017431066543163,(n314:0.0018829335986302715,(((n41:0.0022950683198039177,(n390:0.0013932805704876814,n263:0.004049538357070558):0.003147297535592364):0.0018007600345801714,(n469:0.012875498994139775,(n244:0.002147266983765759,n269:0.008934360501709336):0.0027940424558465177):0.00042969980289026303):0.00000100000050002909,(n8:0.005459754073439209,(n318:0.012653253667107216,n45:0.019540859724143083):0.0009583696809207329):0.0009539105755387608):0.00000100000050002909):0.0010525936132034217):0.001067946161807283,((((n418:0.004193214703862832,n93:0.004967132637109721):0.003913300108869342,(n137:0.00000100000050002909,n103:0.00000100000050002909):0.008603689982884187):0.004355910716002362,(((n102:0.00000100000050002909,n109:0.0010649521454227776):0.00000100000050002909,n446:0.0018429145823691461):0.006259288527686762,(n152:0.008664947600452014,(n298:0.006515621504429676,(((n15:0.005656848667415977,n392:0.005795848738974796):0.0018159477059306107,n220:0.005330698964239148):0.000715595981691445,(n369:0.00000100000050002909,(n185:0.00000100000050002909,(n267:0.002163715814658402,n414:0.0027568456951273853):0.00000100000050002909):0.0014785250109147566):0.004369764224855947):0.0006184450631220819):0.00000100000050002909):0.001280898191073948):0.0003599494922324942):0.000596176021226691,(((((n462:0.006244526917011797,(n202:0.0013785075104215752,n48:0.0010672922374508054):0.0038332962910096998):0.00000100000050002909,((((n136:0.0005594762589637122,n175:0.0025092583865254036):0.00000100000050002909,n214:0.0028035615662361686):0.0008466807845060422,n170:0.002608495656035704):0.0019971980539041645,n346:0.008682696773235517):0.0016680126185917913):0.00000100000050002909,(n291:0.012930738187769481,((n166:0.009349272113539198,(n95:0.009515175579388477,n251:0.006279521535226017):0.00046405808615530375):0.002978384937788896,((n480:0.0063027387556866534,n287:0.013527164085651472):0.004528606665480731,(n403:0.0036775181575443264,n320:0.0011352720650188407):0.0018831053291844073):0.000532131506325627):0.0007300258799795136):0.001414437504145372):0.0002880875759362166,((((n475:0.0024018949084696384,(n367:0.00000100000050002909,n36:0.0011093184853664397):0.0021615145028453585):0.0003924601498805327,((n472:0.00000100000050002909,n157:0.00000100000050002909):0.00024097281906591126,(n197:0.003731659623577125,(n337:0.000536972935474508,(n436:0.003833030407086414,n286:0.0022035034161241103):0.0005455699048719942):0.00000100000050002909):0.00000100000050002909):0.0011990468761917533):0.0013039667633688433,((n332:0.0063977736658090475,n130:0.009929026236645079):0.00214915983654994,((n311:0.004955005859540924,n360:0.00000100000050002909):0.0024180323776997513,(n0:0.0006171181608858516,n289:0.004093863770121567):0.000609917619003372):0.0006165762858959797):0.0002527804850414134):0.0032388347130693496,((n174:0.006844838248704545,((n357:0.008366173266916287,(((n250:0.00048135244937517194,n140:0.0024170649483330063):0.0025482697895911448,n100:0.0009046724174056562):0.00000100000050002909,n64:0.019994801436760357):0.0010368785932502547):0.0007584533913053326,(n56:0.0015024225550143392,n416:0.00000100000050002909):0.004501012637738884):0.00000100000050002909):0.0008120749169959374,n10:0.004458108603608356):0.0008280335582603912):0.00275072068240404):0.00000100000050002909,((n222:0.02172125199037076,((n455:0.011177595039418484,(n23:0.008201220421947212,n117:0.004141096092839694):0.004539817983311499):0.0040290970357895525,n481:0.006273393844892453):0.0021291864194289854):0.0013547018365178305,(((((n321:0.0008122694708643909,n158:0.0016711863799857992):0.003836818886989851,n356:0.0027777500136892314):0.0023531114578915218,(n150:0.0010782555887427958,n63:0.00000100000050002909):0.0031998861152589078):0.0009389827011146441,((((((n7:0.002849031020599147,n361:0.0005459655531171169):0.00000100000050002909,n217:0.0016094283454797494):0.00000100000050002909,(n125:0.003316932722875051,(n226:0.008181351574734076,(n262:0.0027602527524575515,(n338:0.00000100000050002909,n133:0.00000100000050002909):0.0021369303892761994):0.001381581411769424):0.0010716412642764737):0.0010753580378599359):0.0005359190219921983,(n218:0.0011573837221230186,n380:0.0016359542724078582):0.002707071368127047):0.00000100000050002909,(n142:0.0005399231560300595,n71:0.004407215405625574):0.0005278842868857816):0.000337852517169983,(n5:0.01769058660602946,(((n144:0.001640735598472585,n396:0.002781222122798832):0.0027643450318086795,n372:0.014032274145703683):0.00000100000050002909,(n229:0.0019880821570909214,(n43:0.003801987664705335,n39:0.006259101489985875):0.001572486443142734):0.00015142881217817958):0.00000100000050002909):0.00047672167585414586):0.0005305656219233526):0.0004129175746591734,(((((((((((n382:0.0038505428902341197,(n163:0.002148219291655311,(n192:0.00000100000050002909,n113:0.00000100000050002909):0.0016122211862059906):0.00000100000050002909):0.0005363388541424152,n254:0.002707982834308071):0.0005369486699516934,(n19:0.0019876455051269855,n471:0.0026891423773305993):0.0007623556264867811):0.0009612109858213806,n301:0.005990691689601913):0.00000100000050002909,(n108:0.003017604606886848,n96:0.00000100000050002909):0.002618312859148603):0.00000100000050002909,((n415:0.00000100000050002909,n85:0.0006484439685390621):0.00324718050762732,(((((n326:0.001643781393190468,n444:0.002224634921644825):0.00108938452330105,n351:0.005252717871901787):0.00000100000050002909,n247:0.0010467406718266106):0.0007288766518239548,n307:0.0006155625435940552):0.0002921748841536284,n194:0.0027959750793727727):0.00000443898259931376):0.0017997192725812022):0.00000100000050002909,n94:0.001633657425915662):0.0005499210706096968,n190:0.0021478994093100698):0.0016888774717834006,(n313:0.000604986566068463,n336:0.0045362554897637325):0.00488967887208833):0.001416158050932575,((((n445:0.0031576453190516507,n443:0.0005620389795340257):0.0016516037969777698,n128:0.0019492196393628772):0.004271047050721925,((n83:0.006393282771326298,((n349:0.005374333523843608,(n383:0.0005333730394295463,n467:0.001098084789075407):0.0026951403004954215):0.00000100000050002909,(n186:0.0024083743415954676,(n110:0.0021685847612331935,n236:0.0033896047612738426):0.0015866081945217529):0.0010954745450927378):0.005519428683917132):0.004872717119617648,n44:0.010065554073400661):0.0012326184861833657):0.002692609218841973,(n366:0.0057805737303888915,n134:0.002501149251099204):0.0007598643544663087):0.00069995874964518):0.002112276783062379,((((n37:0.004280309165023757,(n399:0.0006198448078795236,n120:0.0010881742768103807):0.0027863764174488642):0.0010922999665874849,(n177:0.018830141593104817,(n54:0.0021194555151166205,n188:0.0014614761735858221):0.0003677274999151187):0.00033411344832721745):0.002938549273030412,((n460:0.00000100000050002909,n334:0.00000200000100005818):0.004820558132543399,n305:0.014516219836724032):0.00000100000050002909):0.0020994416322160673,((n88:0.011794325306998251,((((n69:0.0016132669826934769,n75:0.00000100000050002909):0.0007885348814967514,((n199:0.000604373172631713,n187:0.0006491934307910199):0.0037718504684133257,(n358:0.0012327906641811848,n138:0.0008895974204264906):0.000572318050399273):0.0004084729799802155):0.000601725531282788,((n9:0.006388800703304195,n52:0.003179789627777994):0.0022888148684441045,n155:0.006040278039490419):0.0005851773490802435):0.0008980905852379762,n451:0.009514515149858427):0.002097777886063203):0.0019028402765638988,((n127:0.00889965422079246,(n206:0.0011231671903792469,n204:0.0005290694305338411):0.009870887736103524):0.0011620146460198364,(((((n231:0.00000100000050002909,n70:0.00000100000050002909):0.00000100000050002909,n135:0.00000100000050002909):0.006504555340030957,n284:0.0033178644070076596):0.0003123235485946646,((n317:0.004083480761850739,n464:0.0018052973618665224):0.0015137942547381131,(((n46:0.0010818293130529038,n112:0.00000100000050002909):0.002177064920814276,(((n228:0.008331438395285318,n119:0.00000100000050002909):0.0005783236626251898,n115:0.00000100000050002909):0.00000100000050002909,n212:0.0009027545573644787):0.00044813812895164087):0.00045331145412449996,(((n168:0.012994883389991219,n476:0.0011400072592223363):0.0011299148027324206,n153:0.0022753267927500026):0.00000100000050002909,((n34:0.00000100000050002909,n398:0.00000100000050002909):0.00000100000050002909,n424:0.00000100000050002909):0.0022334493692722198):0.00000100000050002909):0.00000100000050002909):0.00000100000050002909):0.0005999937966020716,((n182:0.004539249379914206,(n111:0.0005121424265859837,n359:0.001064328848530704):0.00000100000050002909):0.004222779580739494,n280:0.0031769950315177972):0.0001689051960037323):0.0013758206341142895):0.0005252475499551187):0.00000100000050002909):0.0005694259829159273):0.0008679347912920285):0.0007650972957173507):0.00000100000050002909):0.00000100000050002909):0.0005053190690416185):0.00000100000050002909):0.00000100000050002909,((n248:0.0028542449865848404,n129:0.00216234010898861):0.006877042630420326,(((n442:0.0037485428214488596,(n98:0.009201053846692037,(n285:0.00618392579217306,n245:0.00000100000050002909):0.0003858717629778868):0.007000888914763793):0.0029800210503769385,(n99:0.0010656131013626583,(n183:0.00000100000050002909,n200:0.0005825936165972154):0.00000100000050002909):0.00000100000050002909):0.0023881665180154666,(n297:0.00764872568474105,(n270:0.00000100000050002909,n274:0.0020517103669632194):0.0014867974456700154):0.003055656552464726):0.001643255472360618):0.0013235100513875732):0.0004386601815677458,(n283:0.004115341438790499,(n169:0.004385406066452424,n172:0.005108800064903916):0.006131865560053637):0.0011198590948431517):0.00039995833360906676):0.0001797177028168941):0.001302928243495551):0.000566502418218208):0.0012840590416296376):0.0029967277045046905,n33:0.012864811598544426):0.0025411375842959733,(n87:0.012650011108948716,n257:0.012320741196359376):0.003249531960158536):0.00013773205482596072):0.0016718322810452657,n393:0.012794854774803993):0.00017659760332609057,(n406:0.0194727759410831,((n430:0.023898210519849895,(n143:0.01102474422591466,n74:0.013045669155729352):0.0025715884978902677):0.0004086128475123561,((n86:0.01767306000975781,(n253:0.012878297791473363,n431:0.011417744745900658):0.0026007573383933116):0.0031276978247433405,(n279:0.013845867894145499,((n264:0.0063400964351381355,n463:0.004216051130162558):0.003209349256020028,n385:0.007669025510307083):0.005414609377398682):0.0011318335273234094):0.0006077061297245011):0.0022555331694166015):0.0017281369018051164):0.03883606920332737):0.007802025180182411):0.04977850708874518;
	TREE 'Imported tree 14++' = (n114:0.05836098662404844,(((((((((((n395:0.011221365877682826,(n196:0.006228530619932565,(n437:0.002733979946006946,n42:0.001427575533143831):0.0010994314740113607):0.0028788501814152553):0.0004973814048887619,n272:0.009438936759333988):0.0023857328388555924,(n256:0.004515943557838037,((n165:0.001172808869370493,n49:0.0012858867901521529):0.0021480336414095155,(n205:0.0005490483168793765,(n268:0.0019432767887450969,(((n370:0.0011447475424294594,(n180:0.0017338809338623283,n191:0.004889762565718601):0.00000100000050002909):0.0005191656110537929,(n325:0.0038590437150307845,(n282:0.0017321059271926244,n40:0.0004955042609547305):0.00000100000050002909):0.00043978684761296745):0.00023464602407979206,((((n104:0.0030582623507563224,(n410:0.0004930021073925802,n408:0.00000100000050002909):0.0018540347465657396):0.0005282236115741965,(n22:0.0037926322494590005,n407:0.003721442934489655):0.00000100000050002909):0.0002580898166365353,((n312:0.0013284149884070426,(n53:0.002139199752997568,n409:0.001788095704975122):0.0008308188672895286):0.0004589953824375346,n219:0.00000100000050002909):0.0013748535956644551):0.00000100000050002909,n362:0.003865694947107015):0.00000100000050002909):0.000719128976077542):0.00000100000050002909):0.00020237333537408768):0.00000100000050002909):0.0023507985086169154):0.00027276558824200167,(n227:0.005517222873867191,((((n198:0.0036530026728723037,((n28:0.005004120626608835,n12:0.0042909261071564075):0.0007007027964499193,(n149:0.003959796665358118,(((((n97:0.003705388632531538,(((n126:0.0014487573870317744,n173:0.0007224171905257465):0.0013291826130902744,n293:0.002580429557666443):0.00028040197260588076,n452:0.004241653152307827):0.00000100000050002909):0.00000100000050002909,((n375:0.0013244256607185033,(n30:0.004686678201212662,n371:0.0004324265372451534):0.002527749732487532):0.003325719719273642,((n131:0.0016430913838191643,n435:0.004418779821067355):0.00040031869869926407,((n427:0.006375060679165661,n203:0.006527557197610631):0.006012025855575026,n419:0.004132607568699005):0.00039140917541314593):0.00000100000050002909):0.0010511063650827026):0.0009595963109589425,(n11:0.006626624213843401,n352:0.004160388719218167):0.0007026771753461749):0.00000100000050002909,(n164:0.002061490913179161,n365:0.00000100000050002909):0.0008140489437019299):0.0003178866350473129,(((n156:0.0040772759019547375,n394:0.0009911625366831735):0.003883050438004062,(n221:0.00000100000050002909,(n342:0.00000100000050002909,n234:0.00000100000050002909):0.0014399595866838358):0.0024297146184758906):0.0009113263504027759,(n426:0.008121726496869661,n479:0.007669689202157509):0.00027280708783124246):0.0008127003264729932):0.0002866462953055543):0.00000100000050002909):0.0003569617501424272):0.00014871374441021272,n478:0.008085261624127425):0.00033689513547446675,n132:0.0072368087882092825):0.0003195355107655695,n62:0.005973833913526633):0.0011180674394528774):0.0003225472821720406):0.0007994341364307552,(((((n422:0.00000100000050002909,n397:0.00000200000100005818):0.003239657717338826,((((n169:0.005395051050349451,n172:0.0024555074695843024):0.004063868150188336,n283:0.0034195442361723244):0.0002109231265283851,((n455:0.008420728839595373,(n117:0.006589631123414082,n23:0.007770568978369825):0.005692984261347843):0.0013348674850569276,(n248:0.0009915851144694035,n129:0.0006267513598440183):0.0025035534784377013):0.0012831816270606614):0.0006698850467957133,((((n240:0.001986665576622334,((n353:0.004607890099992374,n421:0.004009263463698477):0.0004566012489736539,((((n242:0.00000200000100005818,n429:0.0005640782852155008):0.003549839677577989,(n60:0.0014625205454861607,n225:0.003909517948637541):0.0080357624802611):0.0006646538810041637,n328:0.007652330902205402):0.0003738064036111296,(n335:0.007926040262649828,n55:0.0063311299834500345):0.0011903575678572317):0.00000100000050002909):0.00037682984349775983):0.00018840786390246186,(((n207:0.005373918505120763,((((n210:0.003463498966609673,(n468:0.002103590380929054,n377:0.003515082282326565):0.004859336384569267):0.0008492605771586465,((n425:0.005694884343039357,(n306:0.001980016900165369,(n405:0.0030381045637413355,n258:0.00000100000050002909):0.0009750017409300285):0.0019325277399063908):0.00000100000050002909,(n224:0.004105859085969291,n438:0.004532293196833018):0.006554311998993729):0.0014402593094283874):0.00000100000050002909,((n440:0.003161052107500739,n78:0.003502694867038263):0.00027565321858387235,(n211:0.000500299757197887,n32:0.0021402597888316305):0.0009364213494224094):0.0006664366946779295):0.0011769258380653846,((n160:0.010497453815028746,((((n26:0.007510948342044977,(n79:0.004046937253155766,n381:0.009094142096383286):0.0019335318280835887):0.0009592937482471068,n73:0.005627293170641776):0.00000100000050002909,(n141:0.011146134782980429,((n340:0.00047433678384995506,(n14:0.00000100000050002909,n434:0.00000100000050002909):0.0004733145167234165):0.008633133498019183,n364:0.009477982496386084):0.0010531141925002494):0.0009353913391989584):0.00029057939820748387,(n209:0.0083392135255929,((n441:0.003959963308916001,n345:0.012851867750552602):0.000331204841938364,((n145:0.001962372085375234,n388:0.0023856782758396797):0.0071866168647124265,(n189:0.009856100360112722,n450:0.006755101069402723):0.002060826335537425):0.0014391446135385906):0.0009664541883294075):0.0014522691723209042):0.00000100000050002909):0.00000100000050002909,((n237:0.007999935408844768,n273:0.010604492771625052):0.00020649576560137319,((n50:0.008917615883009081,n89:0.0069621735080765725):0.0008394118224423745,(n238:0.002916424680061272,n255:0.0013990744231025965):0.006778770278749946):0.00000100000050002909):0.00048100500438465985):0.0005509649395962717):0.0012542809981327928):0.0007134730196069448,(n346:0.011015624108345817,n259:0.006391602445903431):0.00014228522352947593):0.00017826583479528258,((n314:0.000662835610626522,(n18:0.0004713459575631236,n35:0.0009216933182397928):0.006574951324276798):0.0011232412875581636,(((n239:0.003006579796246631,n459:0.003794496371102061):0.0004125232453077632,(((n281:0.0076407555227659164,((n25:0.000961471778311244,n423:0.0024441228458910334):0.00000100000050002909,(n379:0.0014882917885043197,(n27:0.0009500258430750334,n368:0.0009682594244342889):0.00000100000050002909):0.0004745397850589516):0.004855891977575833):0.00118892980243727,(n201:0.0007164561221482066,(((n260:0.0057635997902875154,(n266:0.00000100000050002909,n265:0.00000100000050002909):0.00000100000050002909):0.00000100000050002909,n154:0.0033085875459783545):0.0027967315330670204,n316:0.006566874720618224):0.00000100000050002909):0.0035552078115609017):0.00028750898544923736,(((n241:0.0023878194661379345,(n309:0.007237432119205198,n384:0.006508021397980721):0.00000100000050002909):0.0024128241903622455,((n230:0.006134863312481985,n462:0.004238984366149564):0.00000100000050002909,(n261:0.0021657716428911517,(n161:0.010385288160069185,n243:0.002363170560239904):0.0035545761771742603):0.0011036143834213974):0.0006538362176793496):0.0012186329009434556,(((((n348:0.010182517538887811,(n304:0.00045062970981610035,n439:0.004508411856241754):0.0031474276349976074):0.0012291595104765261,(n391:0.003013897865442277,(n171:0.0030526522725132913,(n323:0.002055660161615276,n310:0.0011136007183987536):0.0006578579894734492):0.0005152877539785769):0.0012825232709280628):0.00000100000050002909,(((n387:0.006301192454120431,n417:0.004839988403944489):0.0004600479166466046,(n2:0.0033866579580181036,n3:0.0044435959203903315):0.0004648524974429868):0.00000100000050002909,(n66:0.00000100000050002909,n246:0.002116967334566351):0.0022852386637561965):0.0009497983663522913):0.0006337653147134556,n122:0.003135960363732377):0.00000100000050002909,(((n252:0.0029099009486471803,n447:0.00487199764714708):0.0009423153414688274,n324:0.003375561121380892):0.00000100000050002909,((n45:0.01084964283372287,n318:0.012993738993927003):0.0024731419904723924,(n276:0.002290745065859175,n344:0.0014448787902407723):0.0017416726441101603):0.0014818123472970233):0.0009210774884494755):0.0008245593537710891):0.00000100000050002909):0.0008084983783714111):0.00000100000050002909,((((((n446:0.0038117719222157086,(n109:0.00000100000050002909,n102:0.0004053982149905869):0.0024746082547842693):0.004464513220007458,((((n15:0.0036402540511971076,n392:0.0020903345171256844):0.0004685991812612302,n220:0.0017777127970518085):0.000699286278542894,(n369:0.0014427683985539612,((n414:0.0023573348593201693,n267:0.00000100000050002909):0.0010872493562529848,n185:0.00000100000050002909):0.001148989350112575):0.0038211893589240767):0.000575172175473267,(n298:0.00744117984735374,n152:0.013455461829834368):0.0009204850030514069):0.0014583057572546655):0.000506734763034372,((n10:0.009059200145686305,(n64:0.01874225371707019,((n416:0.00000100000050002909,n56:0.0026109426032964716):0.005733788526095634,(n174:0.0051537461565244885,(((n140:0.0034863963428639097,n250:0.0008588433004640022):0.0017198444074430935,n100:0.0004293818260178035):0.00024248575365428304,n357:0.008537592357675827):0.0014804157443160382):0.00000100000050002909):0.00000100000050002909):0.0015126715547468304):0.0016676626964535024,((n436:0.0019360389959412532,((((n289:0.001560783845613633,n0:0.0016817183568405797):0.00000100000050002909,n360:0.0005023550771274646):0.0019565421229055854,(n130:0.010057237428604968,n332:0.006296420736991256):0.00035953554714676666):0.0004978090630882088,((n475:0.0010718563342452074,(n36:0.0009846896966477668,n367:0.00000100000050002909):0.001079165879586447):0.0008261924429487611,((n337:0.0004823255394317063,(n472:0.00000100000050002909,(n157:0.00000100000050002909,n286:0.00000100000050002909):0.000481740109932232):0.0007293021836432004):0.00000100000050002909,n197:0.003335390102434089):0.0014375316568333415):0.0008268791562281039):0.00047758493014976453):0.00000100000050002909,n311:0.007135651308896905):0.0024852934368109502):0.0022592919133688507):0.00033949083968988405,n481:0.003962502297891041):0.00000100000050002909,(n166:0.00830339388260894,(((n88:0.009068209309398115,(n177:0.012637340023455257,((((n9:0.011269025118881797,n52:0.005770888888347496):0.0013172919131135624,n155:0.005350860956769904):0.00000100000050002909,((n138:0.0006758274398312512,n358:0.0010794852123973881):0.0012197361463137611,((n199:0.0005356222249827578,n187:0.00000100000050002909):0.0018992638527147217,(n75:0.00000100000050002909,n69:0.002052731171715779):0.0015832337064555471):0.0004473913751689152):0.0005687995909023064):0.001082423686242777,n451:0.005996363511108697):0.0009105674052704705):0.001360193560457374):0.0012704414291175763,(((((((((n467:0.00000100000050002909,n383:0.0015511065791033532):0.0015475521165502796,n236:0.004018775265024373):0.00000100000050002909,(n349:0.004353550969115091,n186:0.003276344464692715):0.00000100000050002909):0.00000100000050002909,n110:0.003388782597893863):0.0035070990622604733,n83:0.005507823143856594):0.002934978359815287,n44:0.007131837225884973):0.0013908091340918713,((n134:0.001324068044918123,((n443:0.0015299800467223714,n445:0.0030220474009058735):0.0009416457957523713,n128:0.004803113667997834):0.006035857733682792):0.0024396313404161612,n366:0.005774685318467691):0.00037922146308433244):0.0006832315427702608,((n313:0.00000100000050002909,n336:0.0020367924688852544):0.003467499616765371,(n190:0.0014567181938924857,(((((((n254:0.0024740126005530026,n351:0.0026108249938316366):0.0009742226043996923,((n247:0.0010870975708935399,n307:0.00000100000050002909):0.0002768985008459202,(n382:0.0009880502196451565,((n192:0.00000100000050002909,n113:0.00000100000050002909):0.0004916803298653342,n163:0.001944957315932117):0.00000100000050002909):0.0019723773527686567):0.00000100000050002909):0.00000100000050002909,n326:0.0004937359598070529):0.00000100000050002909,n444:0.0010140297041156955):0.00000100000050002909,n194:0.0020535452245012574):0.00000100000050002909,(n85:0.0017641259023341252,n415:0.00000100000050002909):0.0017603206544714288):0.0008184858194929247,(((n301:0.005415518050030493,(n471:0.002997014504606173,n19:0.0014192361807411405):0.0007286489876334746):0.0005327836787958842,(n96:0.00000100000050002909,n108:0.00208271591233427):0.002872743011963572):0.00000100000050002909,n94:0.00000100000050002909):0.00000100000050002909):0.0005339496464334334):0.0010914039751353977):0.0008116412082535376):0.0011612143259623184,(((n206:0.0015069887535026029,n204:0.0019253511105357815):0.004982034927890496,n127:0.009997228303574754):0.0019248523913647378,((n153:0.005205195806468543,((n284:0.0021862566760703786,((n212:0.0011453115553516366,n115:0.00000100000050002909):0.00038108687259398783,(n112:0.00000100000050002909,(n228:0.009276377573441645,(n119:0.0005064295244929243,n46:0.0009832374705960754):0.00000100000050002909):0.00048569097823680975):0.00000100000050002909):0.0003810755434945032):0.00000100000050002909,((n34:0.00000100000050002909,(n398:0.00000100000050002909,n424:0.00000100000050002909):0.00000100000050002909):0.0025777287796052203,((n231:0.00000100000050002909,n70:0.00000100000050002909):0.00000100000050002909,n135:0.00000100000050002909):0.005779072346860021):0.0004696951285845138):0.00000100000050002909):0.0005541043576094339,((n464:0.0021854640138952663,(n476:0.0015340857893492877,(n317:0.0032734992937610043,n168:0.010118401410745726):0.0006325858451606286):0.0006405041837708823):0.00000100000050002909,(n280:0.0017557345303085491,((n182:0.005598553242135958,n359:0.00000100000050002909):0.00000100000050002909,n111:0.0010233516609405304):0.005171646052186357):0.0005312720039909859):0.00032893837346648135):0.0007964168251808855):0.000808570550598525):0.0006364812720524226):0.00000100000050002909,((n334:0.0010965134286670996,n460:0.0010790046130574923):0.0021182143685862347,(((n305:0.011775589378974952,n188:0.0014931995642026522):0.00000100000050002909,(n37:0.004616056551651916,n54:0.002776122060731219):0.0013553156755798919):0.0011408653133115644,(n399:0.00000100000050002909,n120:0.002645158839588721):0.003911880922023628):0.0012360712088821738):0.0013824163178911557):0.0008758956254729203):0.00033338663306186597):0.00030516247221860975,((n8:0.004379934796089411,((n480:0.00440009824821431,n287:0.011183239169433232):0.0023876773206611807,(n403:0.004396442372442671,n320:0.0009826224262216169):0.0009448440122576518):0.00030849961457913146):0.00031130675202210975,((n291:0.0064094338691811316,(n162:0.007789986096333388,(((n93:0.0034844803615349204,n418:0.003689251861501428):0.0045308279711208784,(n137:0.0006616452100973991,n103:0.0011856812098577105):0.004101244635615379):0.005305558730388196,n226:0.004495780072674422):0.0012618097802859732):0.0006383798710732838):0.00000100000050002909,(((n355:0.00414731760826455,((((((((((n175:0.0030809390074181004,n214:0.0034545144588768797):0.001015289250940955,n136:0.0004999545786260659):0.002597645663970361,(n43:0.003519196308658438,n229:0.0014416284494966544):0.00000100000050002909):0.0009593023017706671,n5:0.014667357271842301):0.00000100000050002909,n372:0.014753644962308346):0.00000100000050002909,(n469:0.007784471996118308,(n144:0.0014816776335150146,n396:0.00000100000050002909):0.0019679147112253025):0.00000100000050002909):0.002301966701546849,((n361:0.00000100000050002909,((n170:0.0024258028292629716,n217:0.0009659985434852283):0.0009645114571466337,(n125:0.001481068271660051,((n133:0.00000100000050002909,n338:0.00000100000050002909):0.0009633696159958866,n262:0.0007386549186597806):0.0007324383562034073):0.002199811892231294):0.00000100000050002909):0.00000100000050002909,n7:0.0008586308323414196):0.0007232071756228832):0.00000100000050002909,(n71:0.008564662922870496,(n218:0.00000100000050002909,n380:0.0009782367550577576):0.0038032902646113506):0.00010154543472246489):0.00000100000050002909,n142:0.0009619296650735129):0.00000100000050002909,n39:0.00453015243447974):0.001407021627857309):0.003202458702353639,(n202:0.00000100000050002909,n48:0.0004490465358278966):0.0046373195941941435):0.00000100000050002909,(((n390:0.005982605384207789,n263:0.001908633275669884):0.0038331678470091436,n41:0.0018239968257458702):0.0022547651836626295,((n150:0.004388766273602419,n63:0.00000100000050002909):0.0009481230966420522,(n356:0.0025029565364701337,(n321:0.00000100000050002909,n158:0.0022858038326915775):0.0026988265785542597):0.0017968656654455226):0.0017807790154332215):0.0014691479405461814):0.0008917091464413058):0.00133370569105476):0.00000100000050002909):0.00017434634479241077):0.00000100000050002909):0.0005402574326030912):0.0002300859885347668):0.00000100000050002909,(n269:0.004077957655653236,n244:0.0008583965677263844):0.007394525521065296):0.0004736654014751734,((n95:0.003098217978143727,n251:0.0034229209604629846):0.0022361189227017206,(((n270:0.0005343464623876821,n274:0.0012685235241488516):0.001514069462478834,n297:0.006352614559810026):0.0023377124734774114,(n183:0.0014401336623409793,((n99:0.00000100000050002909,n200:0.0010294718926764969):0.0009528250028987,(n442:0.0038606012529907516,(n245:0.0005179684135700843,(n285:0.0030334983139071754,n98:0.008046365004353117):0.00000100000050002909):0.005329192857568476):0.0017293087874611895):0.00037625727302049555):0.001887198741096976):0.002462782660938538):0.0005982559595619552):0.00022266756435830855):0.0005590378073444571):0.00000100000050002909,(((n288:0.002203350946654,(n80:0.0062758464802500635,n315:0.0043359972882422194):0.0022357690595221176):0.004119155132454276,((((n278:0.002434397748567126,n84:0.00000100000050002909):0.0009835856218959843,n195:0.004812271227806521):0.00031987292926986073,n139:0.002615646789529315):0.0013562236478143201,n222:0.013025060139397908):0.0013439574438326898):0.00041438710718418487,(((n308:0.00725463924563596,n178:0.00387056233869683):0.0037138903658170096,((n299:0.008515798398959941,((n90:0.0012378894571844449,(n181:0.0010255552527493098,(n386:0.00000100000050002909,n107:0.0011447257304174668):0.0019827022690275904):0.0009029113590510281):0.0028845183722801455,(n343:0.0025914166418803705,(n91:0.00000100000050002909,n378:0.0007965586929933893):0.004950624602136616):0.001132946018087219):0.0011393955212219739):0.001071516465807556,(((((((((n81:0.0015274125495887078,(n322:0.0005786429111160284,n216:0.001482634544837273):0.001130107799852479):0.0011176507106256228,n296:0.0035819236991026775):0.00000100000050002909,(n275:0.005898222171431618,n92:0.002531152273719099):0.0008575481089446822):0.00000200000100005818,n347:0.00034150623509221473):0.00000100000050002909,n235:0.00034376946407516107):0.00000100000050002909,n208:0.004005822164055203):0.00000100000050002909,n271:0.005356563862767838):0.0015429321461825265,((n1:0.004897389598031241,n401:0.0014456552027934796):0.0009564603812788645,((n121:0.0009574855760074188,(n339:0.006448089722933914,n57:0.0016957016270412744):0.00048579006558756825):0.000477989512003575,n374:0.0061224250382994104):0.00000100000050002909):0.00000100000050002909):0.0005986966510126814,(((n327:0.003413528797109966,((n473:0.0008237631452725188,n58:0.007552828046682393):0.0018053309490576306,n72:0.003912262488611035):0.0010786365471238228):0.00000100000050002909,n106:0.0044316290100675036):0.00000100000050002909,((n300:0.0009685310187972819,n295:0.0030280924389630335):0.0009701247765445737,n329:0.005850873590536754):0.002885820385682895):0.0002440261255218508):0.0005649883681484156):0.00000100000050002909):0.0002640051652942137,(n461:0.002529411254616899,n59:0.0008762514137127287):0.005421194559075049):0.0005864861853534169):0.00000100000050002909):0.00000100000050002909,((n146:0.001212514572438489,n82:0.003959402577829419):0.0075163838255579655,((((n51:0.00530294422002186,n453:0.0016206300319152973):0.00000100000050002909,(n277:0.0009714251661280143,(n331:0.0009637411383989436,n31:0.0009960002321075527):0.00000100000050002909):0.00047966793237670473):0.0005016200232306557,n17:0.003281663282671513):0.00000100000050002909,((n292:0.007620532706405728,((n67:0.00000100000050002909,n432:0.0010114008300539947):0.002047464236421462,n105:0.004500602737991205):0.002044951606771196):0.00000100000050002909,(n213:0.004595527968448499,(n400:0.012820893857600065,((n402:0.001741300395789428,n77:0.0011085172955354002):0.003966379053152198,(n420:0.00340899043408221,n319:0.0025733813916438654):0.002994109803236256):0.0005810422266711658):0.00009313830731786204):0.0034044873374688128):0.00019716966003159142):0.0006033405725483233):0.00033130022818546133):0.00000100000050002909,((((((n16:0.011113327490546106,(((((n457:0.0023469962407241954,((n124:0.0015257584211325302,n123:0.00000100000050002909):0.0009575393639747883,(n363:0.00000100000050002909,(n470:0.00000100000050002909,n350:0.00000100000050002909):0.0014342292236809821):0.00000100000050002909):0.00000100000050002909):0.0011388929474956393,(n13:0.0023979019523823124,(n47:0.00000100000050002909,n24:0.00000200000100005818):0.0032948576195859997):0.00000100000050002909):0.0005160126988669421,((n404:0.0020132612068372493,n294:0.00000100000050002909):0.002970732355704328,n333:0.0005551216270638301):0.00000100000050002909):0.000573217333427558,((n232:0.004222830596169783,((n148:0.0014369667797074694,(n482:0.0004784163089979814,n176:0.00000200000100005818):0.00000100000050002909):0.00133742336834215,n412:0.005373094323285321):0.00000100000050002909):0.0015028018946828504,(n4:0.003513321659136188,n474:0.0017272062095971146):0.0027998026557980865):0.00000100000050002909):0.0006087446996832556,((n233:0.007079667549726418,(n223:0.01006402369097836,n466:0.003346200450735598):0.00000100000050002909):0.0006071764975395658,((n354:0.007781851862134134,(n116:0.002878375997827001,((n118:0.0031854698661799895,n465:0.0005231104939648504):0.0007942506384757612,n477:0.0014604742908904138):0.00000100000050002909):0.0003774848907710917):0.0027645613141090877,n68:0.0033950791719418068):0.0007822371567003982):0.00023421898139522058):0.00000100000050002909):0.0005585088664695032,(n147:0.004570866492986034,((((n456:0.002935760593938798,n411:0.006062586030672084):0.0034964796828244804,(n215:0.0015362607155890821,n290:0.003419033702556147):0.003036904628207987):0.0005419801633865517,n249:0.005152460890945088):0.00000100000050002909,((n303:0.0033974783662891824,n458:0.00504205699712904):0.0025049461949934178,n61:0.004967881190391423):0.00000100000050002909):0.0007715202773873667):0.0006085879772846245):0.00028009068794101295,(n341:0.01050560476216484,(n193:0.00000100000050002909,(n6:0.00000100000050002909,(n29:0.00000100000050002909,n167:0.00000100000050002909):0.0040822707460345204):0.00000200000100005818):0.0040017474450789485):0.0015049973554320073):0.00000100000050002909,((n433:0.005766699974214651,n376:0.005671539569271362):0.0018058997930870597,n159:0.013962229248807509):0.0004065922200660458):0.0002955536849381356,(((n330:0.007420554998934726,((n428:0.005432144909551264,n179:0.0012525082466128344):0.010690327904660377,(n101:0.0038208144437668567,(n413:0.006441439839396347,n38:0.0019430467140930151):0.0004199492923154281):0.0003986417524869917):0.0019887425588574733):0.0002083705675366707,n449:0.005287197048444926):0.00000100000050002909,(n389:0.006974362759336604,(n151:0.008461606227842151,n373:0.00380292447074634):0.0007238490855649418):0.0016706547880941912):0.00037169301099884385):0.00000100000050002909,(n302:0.0015831970596468098,((n76:0.0011436150932829549,n20:0.0027302147533156216):0.004402007880394981,n184:0.00588888954473901):0.01571079290115278):0.0036907481298811763):0.0003402857785431203):0.0007318235364686434):0.0003495888396810481,(n448:0.005462218251996807,n21:0.003037379453275162):0.00028676013966246594):0.003536171600510232,n33:0.015531898791095991):0.0018818698504597855,(n454:0.010878517593893917,(n257:0.010637554943794425,n87:0.009567065564209252):0.003392031450059564):0.0004035190844382156):0.002820921858909438,n393:0.010812114655025021):0.0001757572489482682,(((((n74:0.010579684130397178,n143:0.014310773832496765):0.002353980638035586,(n279:0.011745319747314777,((n264:0.007111139361323682,n463:0.004283989891952225):0.0030259661164210626,n385:0.007004255659676947):0.0034414692029779313):0.0016568394244723824):0.00000100000050002909,n430:0.022147724294051114):0.0009060673296511298,((n253:0.011083447573146638,n431:0.011145965278298158):0.0017978335247451932,n86:0.016588165436197146):0.004478071909169451):0.0012236569681461098,n406:0.016791580174070134):0.0020146574864641623):0.03723465959653066,n65:0.07283700746964138):0.008213319243747515):0.0507814779575303;
[truncated: 5,869,290 more chars]
